# Supplementary material for: Discovery of new Cdc2-like kinase 4 (CLK4) inhibitors via pharmacophore exploration combined with flexible docking-based ligand/receptor contact fingerprints and machine learning
Source: Royal Society of Chemistry journal article supplement (doi:10.1039/d2ra00136e), 2022-01-01
Supplement: d2ra00136e1.pdf [file d2ra00136e1.pdf]

**Table S1.** The structures of CLK4 inhibitors utilized in modelling.

| Compound | R <sub>1</sub>                                                                      | R <sub>2</sub>                                                                      | IC <sub>50</sub> (nM) | Reference |
|----------|-------------------------------------------------------------------------------------|-------------------------------------------------------------------------------------|-----------------------|-----------|
|          | 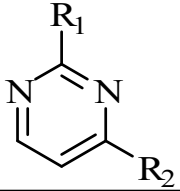   |                                                                                     |                       |           |
| 1        |    |    | 319                   | 7         |
| 2        |    |    | 92                    | 7         |
| 3        |    |    | 6,806                 | 7         |
| 4        |    |    | 3,858                 | 7         |
| 5        |    |    | 14                    | 7         |
| 6*       |  |  | 18                    | 7         |
| 7*       |  |  | 4                     | 7         |
| 8        |  |  | 9                     | 7         |
| 9        |  |  | 16                    | 7         |
| 10*      |  |  | 13                    | 7         |
| 11       |  |  | 30                    | 7         |
| 12       |  |  | 123                   | 7         |
| 13*      |  |  | 60                    | 7         |

| Compound | R1 | R2 | IC <sub>50</sub> (nM) | Reference |
|----------|----|----|-----------------------|-----------|
| 14       |    |    | 86                    | 7         |
| 15       |    |    | 42                    | 7         |
| 16*      |    |    | 75                    | 7         |
| 17       |    |    | 5450                  | 7         |

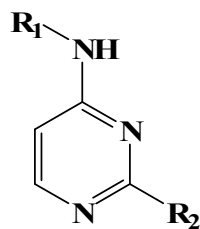

| Compound | R1 | R2 | IC <sub>50</sub> (nM) | Reference |
|----------|----|----|-----------------------|-----------|
| 18       |    |    | 1294                  | 7         |
| 19*      |    |    | 574                   | 7         |
| 20       |    |    | 241                   | 7         |
| 21       |    |    | 9284                  | 7         |
| 22       |    |    | 526                   | 7         |
| 23       |    |    | 68                    | 7         |

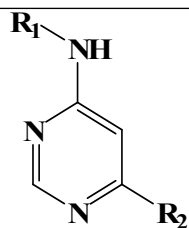

| Compound | R1 | R2 | IC <sub>50</sub> (nM) | Reference |
|----------|----|----|-----------------------|-----------|
| 24       |    |    | 7535                  | 7         |

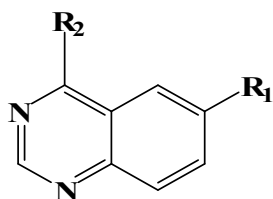

| Compound | R1 | R2 | IC <sub>50</sub> (nM) | Reference |
|----------|----|----|-----------------------|-----------|
| 25       |    |    | 1122                  | 8         |
| 26       |    |    | 126                   | 8         |
| 27       |    |    | 631                   | 8         |
| 28*      |    |    | 224                   | 8         |
| 29       |    |    | 282                   | 8         |
| 30       |    |    | 3550                  | 8         |
| 31       |    |    | 100                   | 8         |
| 32       |    |    | 447                   | 8         |

| Compound | R <sub>1</sub>                                                                      | R <sub>2</sub>                                                                      | IC <sub>50</sub> (nM) | Reference |
|----------|-------------------------------------------------------------------------------------|-------------------------------------------------------------------------------------|-----------------------|-----------|
| 33       | 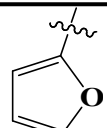   |    | 794                   | 8         |
| 34*      |    |    | 891                   | 8         |
| 35       |    |    | 708                   | 8         |
| 36       |    |    | 126                   | 8         |
| 37       |    |    | 141                   | 8         |
| 38       |   |   | 178                   | 8         |
| 39       |  |  | 1000                  | 8         |
| 40       |  |  | 63                    | 8         |
| 41       |  |  | 111                   | 8         |
| 42       |  |  | 1000                  | 8         |
| 43       |  |  | 178                   | 8         |

| Compound | R <sub>1</sub>                                                                    | R <sub>2</sub>                                                                    | IC <sub>50</sub> (nM) | Reference |
|----------|-----------------------------------------------------------------------------------|-----------------------------------------------------------------------------------|-----------------------|-----------|
| 44       | 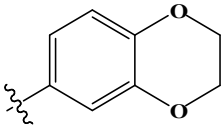 |  | 501                   | 8         |
| 45       |  |  | 501                   | 8         |
| 46       |  |  | 891                   | 8         |
| 47       |  |  | 63                    | 8         |
| 48       |  |  | 141                   | 8         |

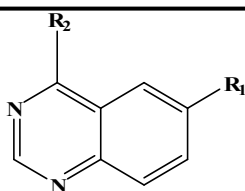

| Compound | R <sub>1</sub>                                                                      | R <sub>2</sub>                                                                      | IC <sub>50</sub> (nM) | Reference |
|----------|-------------------------------------------------------------------------------------|-------------------------------------------------------------------------------------|-----------------------|-----------|
| 49*      | 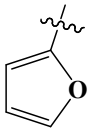 |  | 250                   | 8         |
| 50*      |  |  | 158                   | 8         |

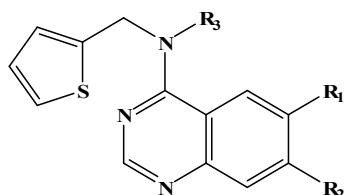

| Compound | R <sub>1</sub>                                                                      | R <sub>2</sub> | R <sub>3</sub> | IC <sub>50</sub> (nM) | Reference |
|----------|-------------------------------------------------------------------------------------|----------------|----------------|-----------------------|-----------|
| 51*      | 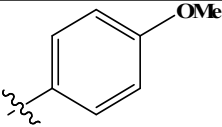 | H              | H              | 331                   | 9         |
| 52       |  | H              | H              | 3675                  | 9         |

| Compound | R1                                                                                | R2 | R3 | IC <sub>50</sub> (nM) | Reference |
|----------|-----------------------------------------------------------------------------------|----|----|-----------------------|-----------|
| 53*      | 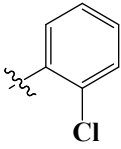 | H  | H  | 7943                  | 9         |
| 54*      |  | H  | H  | 3981                  | 9         |
| 55       |  | H  | H  | 7943                  | 9         |
| 56*      |  | H  | H  | 128                   | 9         |
| 57*      |  | H  | H  | 1642                  | 9         |

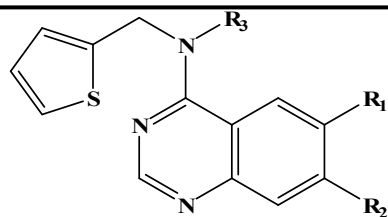

| Compound | R <sub>1</sub>                                                                      | R <sub>2</sub> | R <sub>3</sub> | IC <sub>50</sub> (nM) | Reference |
|----------|-------------------------------------------------------------------------------------|----------------|----------------|-----------------------|-----------|
| 58       | 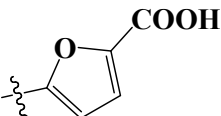 | H              | H              | 199                   | 9         |
| 59       |  | H              | H              | 241                   | 9         |

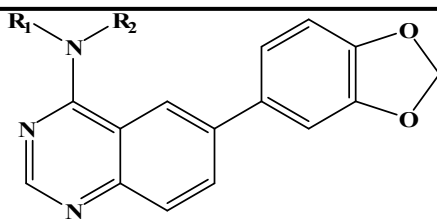

| Compound | R <sub>1</sub>                  | R <sub>2</sub>                                                                      | IC <sub>50</sub> (nM) | Reference |
|----------|---------------------------------|-------------------------------------------------------------------------------------|-----------------------|-----------|
| 60       | CH <sub>3</sub>                 | 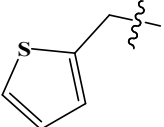 | 12                    | 9         |
| 61       | CH <sub>2</sub> CH <sub>3</sub> |  | 14                    | 9         |
| 62*      | H                               |  | 117                   | 9         |

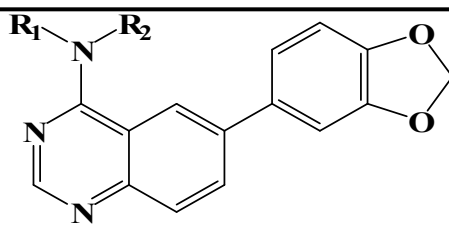

| Compound | R <sub>1</sub>  | R <sub>2</sub> | IC <sub>50</sub> (nM) | Reference |
|----------|-----------------|----------------|-----------------------|-----------|
| 63       | CH <sub>3</sub> |                | 29                    | 9         |
| 64       | H               |                | 35                    | 9         |
| 65       | H               |                | 79                    | 9         |
| 66       | CH <sub>3</sub> |                | 36                    | 9         |
| 67*      | H               |                | 42                    | 9         |
| 68       | H               |                | 47                    | 9         |
| 69       | H               |                | 15                    | 9         |
| 70       | H               |                | 40                    | 9         |
| 71       | CH <sub>3</sub> |                | 11                    | 9         |
| 72       | H               |                | 50                    | 9         |
| 73       | CH <sub>3</sub> |                | 20                    | 9         |
| 74       | CH <sub>3</sub> |                | 37                    | 9         |
| 75*      | H               |                | 34                    | 9         |
| 76       | CH <sub>3</sub> |                | 120                   | 9         |

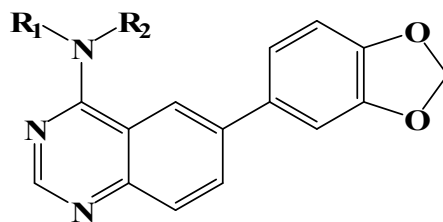

| Compound | R <sub>1</sub>  | R <sub>2</sub> | IC <sub>50</sub> (nM) | Reference |
|----------|-----------------|----------------|-----------------------|-----------|
| 77       | H               |                | 161                   | 9         |
| 78       | CH <sub>3</sub> |                | 45                    | 9         |
| 79       | H               |                | 141                   | 9         |
| 80       | H               |                | 257                   | 9         |
| 81       | H               |                | 29                    | 9         |
| 82*      | H               |                | 90                    | 9         |
| 83       | H               |                | 70                    | 9         |

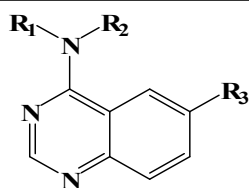

| Compound | R <sub>1</sub>  | R <sub>2</sub> | R <sub>3</sub> | IC <sub>50</sub> (nM) | Reference |
|----------|-----------------|----------------|----------------|-----------------------|-----------|
| 84       | H               |                |                | 249                   | 9         |
| 85       | CH <sub>3</sub> |                |                | 269                   | 9         |
| 86       | CH <sub>3</sub> |                |                | 81                    | 9         |



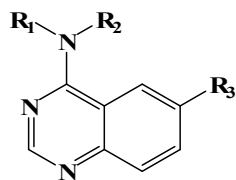

| Compound | R <sub>1</sub> | R <sub>2</sub> | R <sub>3</sub> | IC <sub>50</sub> (nM) | Reference |
|----------|----------------|----------------|----------------|-----------------------|-----------|
| 87       | H              |                |                | 88                    | 9         |
| 88       | H              |                |                | 1666                  | 9         |
| 89       | H              |                |                | 136                   | 9         |
| 90       | H              |                |                | 229                   | 9         |
| 91       | H              |                |                | 104                   | 9         |

\* These compounds were used as testing compounds in ML-QSAR modelling.

**Table S2.** Training subsets employed in exploring the pharmacophoric space of CLK4 inhibitors.

| Subset | Most active <sup>a</sup>                                         | Moderately active                   | Least active <sup>b</sup>               | No. of compounds | Activity spread |
|--------|------------------------------------------------------------------|-------------------------------------|-----------------------------------------|------------------|-----------------|
| 1      | 2, 10, 14, 15                                                    | 4,12, 27, 32, 37, 44                | 21, 24, 53, 55                          | 14               | 2.5             |
| 2      | 10                                                               | 27, 32, 48, 44                      | 21, 53, 55                              | 8                | 2.5             |
| 3      | 60, 63, 66, 71, 73, 74,<br>78                                    | 85                                  | 3, 4, 17, 21, 24,<br>52, 53, 54, 55     | 17               | 2.5             |
| 4      | 31, 40, 43, 47, 62, 65,<br>67, 68, 76, 83, 85                    | -                                   | 4, 52, 53, 54, 55                       | 16               | 2.5             |
| 5      | 26, 31, 36, 40, 47, 56,<br>62, 64, 65, 67, 68, 69,<br>70, 75, 81 | 43, 52                              | 3, 17, 21, 24,<br>53, 55                | 23               | 2.5             |
| 6      | 11, 12, 13, 20                                                   | 1, 18, 33                           | 3, 4, 17, 21, 24, 30,<br>52, 53, 54, 55 | 17               | 2.0             |
| 7      | 5, 6, 7, 8, 9                                                    | 1, 2, 12, 14, 15, 16, 22,<br>23, 36 | 18, 21, 52, 53, 54,<br>55, 57, 88       | 22               | 2.5             |
| 8      | 26, 31, 36, 40, 47, 48,<br>56, 62, 64, 65, 67, 68,<br>70, 75, 81 | -                                   | 3, 17, 21, 24,<br>52, 53, 55            | 22               | 2.0             |

<sup>a, b</sup> Potency categories <sup>10-20</sup>.

**Table S3.** Training sets and HYPOGEN run parameters employed for exploring CLK4 inhibitors pharmacophoric space.

| Run Number | Training set <sup>a</sup> | Number of compounds | Selected Features <sup>b</sup>                          | Min-Max Features <sup>c</sup> | Spacing <sup>d</sup> |
|------------|---------------------------|---------------------|---------------------------------------------------------|-------------------------------|----------------------|
| 1          | <b>1</b>                  | 14                  | HBA (1-4), HBD (0-1), Hbic (1-3), RingArom (1-3)        | 4-5                           | 100                  |
| 2          |                           | 14                  | HBA (1-4), HBD (0-1), Hbic (1-3), RingArom (1-3), 10 EV | 4-5                           | 100                  |
| 3          |                           | 14                  | HBA (1-4), HBD (0-1), Hbic (1-3), RingArom (1-3)        | 4-5                           | 300                  |
| 4          |                           | 14                  | HBA (1-4), HBD (0-1), Hbic (1-3), RingArom (1-3), 10 EV | 4-5                           | 300                  |
| 5          |                           | 14                  | HBA (1-4), HBD (0-1), Hbic (1-3), RingArom (1-3)        | 5-5                           | 100                  |
| 6          |                           | 14                  | HBA (1-4), HBD (0-1), Hbic (1-3), RingArom (1-3), 10 EV | 5-5                           | 100                  |
| 7          |                           | 14                  | HBA (1-4), HBD (0-1), Hbic (1-3), RingArom (1-3)        | 5-5                           | 300                  |
| 8          |                           | 14                  | HBA (1-4), HBD (0-1), Hbic (1-3), RingArom (1-3), 10 EV | 5-5                           | 300                  |
| 1          | <b>2</b>                  | 8                   | HBA (1-4), HBD (0-1), Hbic (1-3), RingArom (1-3)        | 4-5                           | 100                  |
| 2          |                           | 8                   | HBA (1-4), HBD (0-1), Hbic (1-3), RingArom (1-3), 10 EV | 4-5                           | 100                  |
| 3          |                           | 8                   | HBA (1-4), HBD (0-1), Hbic (1-3), RingArom (1-3)        | 4-5                           | 300                  |
| 4          |                           | 8                   | HBA (1-4), HBD (0-1), Hbic (1-3), RingArom (1-3), 10 EV | 4-5                           | 300                  |
| 5          |                           | 8                   | HBA (1-4), HBD (0-1), Hbic (1-3), RingArom (1-3)        | 5-5                           | 100                  |
| 6          |                           | 8                   | HBA (1-4), HBD (0-1), Hbic (1-3), RingArom (1-3), 10 EV | 5-5                           | 100                  |
| 7          |                           | 8                   | HBA (1-4), HBD (0-1), Hbic (1-3), RingArom (1-3)        | 5-5                           | 300                  |
| 8          |                           | 8                   | HBA (1-4), HBD (0-1), Hbic (1-3), RingArom (1-3), 10 EV | 5-5                           | 300                  |
| 1          | <b>3</b>                  | 17                  | HBA (1-4), Hbic (1-3), RingArom (1-3)                   | 4-5                           | 100                  |
| 2          |                           | 17                  | HBA (1-4), Hbic (1-3), RingArom (1-3), 10 EV            | 4-5                           | 100                  |
| 3          |                           | 17                  | HBA (1-4), Hbic (1-3), RingArom (1-3)                   | 4-5                           | 300                  |
| 4          |                           | 17                  | HBA (1-4), Hbic (1-3), RingArom (1-3), 10 EV            | 4-5                           | 300                  |
| 5          |                           | 17                  | HBA (1-4), Hbic (1-3), RingArom (1-3)                   | 5-5                           | 100                  |
| 6          |                           | 17                  | HBA (1-4), Hbic (1-3), RingArom (1-3), 10 EV            | 5-5                           | 100                  |
| 7          |                           | 17                  | HBA (1-4), Hbic (1-3), RingArom (1-3)                   | 5-5                           | 300                  |
| 8          |                           | 17                  | HBA (1-4), Hbic (1-3), RingArom (1-3), 10 EV            | 5-5                           | 300                  |
| 1          | <b>4</b>                  | 16                  | HBA (1-4), HBD (0-1), Hbic (1-3), RingArom (1-3)        | 4-5                           | 100                  |
| 2          |                           | 16                  | HBA (1-4), HBD (0-1), Hbic (1-3), RingArom (1-3), 10 EV | 4-5                           | 100                  |
| 3          |                           | 16                  | HBA (1-4), HBD (0-1), Hbic (1-3), RingArom (1-3)        | 4-5                           | 300                  |
| 4          |                           | 16                  | HBA (1-4), HBD (0-1), Hbic (1-3), RingArom (1-3), 10 EV | 4-5                           | 300                  |
| 5          |                           | 16                  | HBA (1-4), HBD (0-1), Hbic (1-3), RingArom (1-3)        | 5-5                           | 100                  |
| 6          |                           | 16                  | HBA (1-4), HBD (0-1), Hbic (1-3), RingArom (1-3), 10 EV | 5-5                           | 100                  |
| 7          |                           | 16                  | HBA (1-4), HBD (0-1), Hbic (1-3), RingArom (1-3)        | 5-5                           | 300                  |
| 8          |                           | 16                  | HBA (1-4), HBD (0-1), Hbic (1-3), RingArom (1-3), 10 EV | 5-5                           | 300                  |

<sup>a</sup>Training subsets as in Table S2. <sup>b</sup>HBA: Hydrogen Bond Acceptor, HBD: Hydrogen Bond Donor, RingArom: Ring Aromatic, Hbic: Hydrophobic. EV: maximum number of allowed exclusion spheres. Numbers in brackets refer to the allowed ranges of corresponding features in each pharmacophore modeling run. <sup>c</sup>Min-Max refers to the allowed range of pharmacophoric features in each model. <sup>d</sup>Spacing refers to the maximum interfeature distance in picometers. Other parameters were set to their default values

**Table S3.** Training sets and HYPOGEN run parameters employed for exploring CLK4 inhibitors pharmacophoric space.

| Run Number | Training set <sup>a</sup> | Number of compounds | Selected Features <sup>b</sup>                          | Min-Max Features <sup>c</sup> | Spacing <sup>d</sup> |
|------------|---------------------------|---------------------|---------------------------------------------------------|-------------------------------|----------------------|
| 1          | <b>5</b>                  | 23                  | HBA (1-4), HBD (0-1), Hbic (1-3), RingArom (1-3)        | 4-5                           | 100                  |
| 2          |                           | 23                  | HBA (1-4), HBD (0-1), Hbic (1-3), RingArom (1-3), 10 EV | 4-5                           | 100                  |
| 3          |                           | 23                  | HBA (1-4), HBD (0-1), Hbic (1-3), RingArom (1-3)        | 4-5                           | 300                  |
| 4          |                           | 23                  | HBA (1-4), HBD (0-1), Hbic (1-3), RingArom (1-3), 10 EV | 4-5                           | 300                  |
| 5          |                           | 23                  | HBA (1-4), HBD (0-1), Hbic (1-3), RingArom (1-3)        | 5-5                           | 100                  |
| 6          |                           | 23                  | HBA (1-4), HBD (0-1), Hbic (1-3), RingArom (1-3), 10 EV | 5-5                           | 100                  |
| 7          |                           | 23                  | HBA (1-4), HBD (0-1), Hbic (1-3), RingArom (1-3)        | 5-5                           | 300                  |
| 8          |                           | 23                  | HBA (1-4), HBD (0-1), Hbic (1-3), RingArom (1-3), 10 EV | 5-5                           | 300                  |
| 1          | <b>6</b>                  | 17                  | HBA (1-4), HBD (0-1), Hbic (1-3), RingArom (1-3)        | 4-5                           | 100                  |
| 2          |                           | 17                  | HBA (1-4), HBD (0-1), Hbic (1-3), RingArom (1-3), 10 EV | 4-5                           | 100                  |
| 3          |                           | 17                  | HBA (1-4), HBD (0-1), Hbic (1-3), RingArom (1-3)        | 4-5                           | 300                  |
| 4          |                           | 17                  | HBA (1-4), HBD (0-1), Hbic (1-3), RingArom (1-3), 10 EV | 4-5                           | 300                  |
| 5          |                           | 17                  | HBA (1-4), HBD (0-1), Hbic (1-3), RingArom (1-3)        | 5-5                           | 100                  |
| 6          |                           | 17                  | HBA (1-4), HBD (0-1), Hbic (1-3), RingArom (1-3), 10 EV | 5-5                           | 100                  |
| 7          |                           | 17                  | HBA (1-4), HBD (0-1), Hbic (1-3), RingArom (1-3)        | 5-5                           | 300                  |
| 8          |                           | 17                  | HBA (1-4), HBD (0-1), Hbic (1-3), RingArom (1-3), 10 EV | 5-5                           | 300                  |
| 1          | <b>7</b>                  | 22                  | HBA (0-5), HBD (0-5), Hbic (0-5)                        | 4-5                           | 100                  |
| 2          |                           | 22                  | HBA (0-5), HBD (0-5), Hbic (0-5), 10 EV                 | 4-5                           | 100                  |
| 3          |                           | 22                  | HBA (0-5), HBD (0-5), Hbic (0-5)                        | 4-5                           | 300                  |
| 4          |                           | 22                  | HBA (0-5), HBD (0-5), Hbic (0-5), 10 EV                 | 4-5                           | 300                  |
| 5          |                           | 22                  | HBA (0-5), HBD (0-5), Hbic (0-5)                        | 5-5                           | 100                  |
| 6          |                           | 22                  | HBA (0-5), HBD (0-5), Hbic (0-5), 10 EV                 | 5-5                           | 100                  |
| 7          |                           | 22                  | HBA (0-5), HBD (0-5), Hbic (0-5)                        | 5-5                           | 300                  |
| 8          |                           | 22                  | HBA (0-5), HBD (0-5), Hbic (0-5), 10 EV                 | 5-5                           | 300                  |
| 1          | <b>8</b>                  | 22                  | HBA (1-4), HBD (0-1), Hbic (1-3), RingArom (1-3)        | 4-5                           | 100                  |
| 2          |                           | 22                  | HBA (1-4), HBD (0-1), Hbic (1-3), RingArom (1-3), 10 EV | 4-5                           | 100                  |
| 3          |                           | 22                  | HBA (1-4), HBD (0-1), Hbic (1-3), RingArom (1-3)        | 4-5                           | 300                  |
| 4          |                           | 22                  | HBA (1-4), HBD (0-1), Hbic (1-3), RingArom (1-3), 10 EV | 4-5                           | 300                  |
| 5          |                           | 22                  | HBA (1-4), HBD (0-1), Hbic (1-3), RingArom (1-3)        | 5-5                           | 100                  |
| 6          |                           | 22                  | HBA (1-4), HBD (0-1), Hbic (1-3), RingArom (1-3), 10 EV | 5-5                           | 100                  |
| 7          |                           | 22                  | HBA (1-4), HBD (0-1), Hbic (1-3), RingArom (1-3)        | 5-5                           | 300                  |
| 8          |                           | 22                  | HBA (1-4), HBD (0-1), Hbic (1-3), RingArom (1-3), 10 EV | 5-5                           | 300                  |

<sup>a</sup>Training subsets as in Table S2. <sup>b</sup>HBA: Hydrogen Bond Acceptor, HBD: Hydrogen Bond Donor, RingArom: Ring Aromatic, Hbic: Hydrophobic. EV: maximum number of allowed exclusion spheres. Numbers in brackets refer to the allowed ranges of corresponding features in each pharmacophore modeling run. <sup>c</sup>Min-Max refers to the allowed range of pharmacophoric features in each model. <sup>d</sup>Spacing refers to the maximum interfeature distance in picometers. Other parameters were set to their default values.

**Table S4.** The performance of the best representatives (cluster centres) of clustered pharmacophore hypothesis generated for CLK4 inhibitors.

| Training Subset | Run <sup>a</sup> | Hypothesis <sup>b</sup>  | Pharmacophoric Features in Generated Hypothesis | Total cost | Cost of null hypothesis | Residual Cost <sup>c</sup> | R <sub>run</sub> <sup>d</sup> | F <sub>total</sub> <sup>e</sup> | Cat-Scramble |
|-----------------|------------------|--------------------------|-------------------------------------------------|------------|-------------------------|----------------------------|-------------------------------|---------------------------------|--------------|
| 1               | 2                | 9                        | HBA, Hbic, 2×RingArom, EV                       | 68.5       | 73.7                    | 5.2                        | 0.94                          | 30.9                            | 90%          |
|                 | 4                | 5                        | HBA, Hbic, 2×RingArom, EV                       | 67.3       | 73.7                    | 6.4                        | 0.92                          | 4.35                            | 90%          |
|                 | 2                | 10                       | HBA, 2×Hbic, RingArom                           | 68.6       | 73.7                    | 5.1                        | 0.94                          | 41.4                            | 90%          |
|                 | 5                | 10                       | HBA, 3×Hbic, RingArom                           | 68.1       | 73.7                    | 5.6                        | 0.89                          | 20.0                            | 90%          |
|                 | 5                | 1                        | HBA, 3×Hbic, RingArom                           | 65.5       | 73.7                    | 8.2                        | 0.95                          | 2.3                             | 90%          |
|                 | 7                | 1                        | HBA, 3×Hbic, RingArom                           | 65.1       | 73.7                    | 8.6                        | 0.91                          | 0.58                            | 80%          |
|                 | 6                | 2                        | HBA, 3×Hbic, RingArom                           | 65.4       | 73.7                    | 8.3                        | 0.95                          | 4.8                             | 90%          |
|                 | 3                | 2                        | HBA, 2×Hbic, RingArom                           | 66.0       | 73.7                    | 7.7                        | 0.95                          | 1.88                            | 90%          |
|                 | 3                | 6                        | HBA, 2×Hbic, RingArom                           | 68.6       | 73.7                    | 5.1                        | 0.91                          | 0.77                            | 90%          |
|                 | 4                | 7                        | HBA, 2×Hbic, RingArom, 3×EV                     | 68.0       | 73.7                    | 5.7                        | 0.90                          | 0.59                            | 90%          |
| 1               | 8                | HBA, HBD, Hbic, RingArom | 67.8                                            | 73.7       | 5.9                     | 0.95                       | 1.48                          | 90%                             |              |
| 2               | 2                | 7                        | HBA, Hbic, 2×RingArom, 5×EV                     | 52.8       | 53.5                    | 0.7                        | 0.97                          | 8.98                            | 90%          |
|                 | 2                | 8                        | 2×HBA, Hbic, RingArom, 2×EV                     | 52.9       | 53.5                    | 0.6                        | 0.97                          | 6.8                             | 90%          |
|                 | 7                | 8                        | HBA, 3×Hbic, RingArom                           | 49.5       | 53.5                    | 4                          | 0.95                          | 5.9                             | 90%          |
|                 | 8                | 9                        | HBA, 3×Hbic, RingArom                           | 49.2       | 53.5                    | 4.3                        | 0.94                          | 3.8                             | 90%          |
|                 | 8                | 5                        | HBA, 3×Hbic, RingArom                           | 49.0       | 53.5                    | 4.5                        | 0.97                          | 2.2                             | 90%          |
|                 | 5                | 2                        | HBA, 3×Hbic, RingArom                           | 50.5       | 53.5                    | 3.0                        | 0.97                          | 1.4                             | 90%          |
|                 | 5                | 3                        | HBA, 3×Hbic, RingArom                           | 50.8       | 53.5                    | 2.7                        | 0.96                          | 0.09                            | 90%          |
|                 | 5                | 5                        | HBA, 3×Hbic, RingArom                           | 50.9       | 53.5                    | 2.6                        | 0.97                          | 5.27                            | 90%          |
|                 | 1                | 5                        | 2×HBA, Hbic, RingArom                           | 52.6       | 53.5                    | 0.9                        | 0.98                          | 32.1                            | 90%          |
| 1               | 7                | 2×HBA, Hbic, RingArom    | 52.7                                            | 53.5       | 0.8                     | 0.98                       | 2.55                          | 90%                             |              |
| 3               | 3                | 7                        | HBA, Hbic, 2×RingArom                           | 72.1       | 127.3                   | 55.2                       | 0.99                          | 14.9                            | 90%          |
|                 | 3                | 10                       | HBA, Hbic, 2×RingArom                           | 72.3       | 127.3                   | 55.0                       | 0.99                          | 3.3                             | 90%          |
|                 | 4                | 4                        | HBA, Hbic, 2×RingArom, EV                       | 71.9       | 127.3                   | 55.4                       | 0.99                          | 9.8                             | 90%          |
|                 | 1                | 2                        | HBA, Hbic, 2×RingArom                           | 73.9       | 127.3                   | 53.4                       | 0.99                          | 20.1                            | 90%          |
|                 | 1                | 3                        | 2×HBA, Hbic, RingArom                           | 74.0       | 127.3                   | 53.3                       | 0.99                          | 7.8                             | 90%          |
|                 | 1                | 7                        | 2×HBA, Hbic, RingArom                           | 74.5       | 127.3                   | 52.8                       | 0.98                          | 13.0                            | 90%          |
|                 | 8                | 3                        | HBA, 3×Hbic, RingArom, 2×EV                     | 69.8       | 127.3                   | 57.5                       | 0.98                          | 10                              | 90%          |
|                 | 8                | 4                        | HBA, 3×Hbic, RingArom                           | 70         | 127.3                   | 57.3                       | 0.99                          | 18.3                            | 90%          |
|                 | 6                | 7                        | 2×HBA, Hbic, RingArom, 2×EV                     | 74.4       | 127.3                   | 52.9                       | 0.98                          | 7.89                            | 90%          |

**Table S4.** The performance of the best representatives (cluster centres) of clustered pharmacophore hypothesis generated for CLK4 inhibitors.

| Training Subset | Run <sup>a</sup>     | Hypothesis <sup>b</sup> | Pharmacophoric Features in Generated Hypothesis | Total cost  | Cost of null hypothesis | Residual Cost <sup>c</sup> | R <sub>run</sub> <sup>d</sup> | F <sub>total</sub> <sup>e</sup> | Cat-Scramble |
|-----------------|----------------------|-------------------------|-------------------------------------------------|-------------|-------------------------|----------------------------|-------------------------------|---------------------------------|--------------|
|                 | 6                    | 8                       | HBA, Hbic, 2×RingArom                           | 74.4        | 127.3                   | 52.9                       | 0.99                          | 15.15                           | 90%          |
| 4               | 3                    | 4                       | HBA, 2×Hbic, RingArom                           | 72.1        | 78.7                    | 6.6                        | 0.97                          | 4.75                            | 90%          |
|                 | 3                    | 6                       | 2×HBA, Hbic, RingArom                           | 73.6        | 78.7                    | 5.1                        | 0.91                          | 14.3                            | 90%          |
|                 | 2                    | 1                       | HBA, 2×Hbic, RingArom                           | 73.9        | 78.7                    | 4.8                        | 0.97                          | 17.5                            | 90%          |
|                 | 2                    | 2                       | HBA, 2×Hbic, RingArom                           | 74.7        | 78.7                    | 4.0                        | 0.95                          | 12.9                            | 90%          |
|                 | 2                    | 3                       | 2×HBA, Hbic, RingArom                           | 74.8        | 78.7                    | 3.9                        | 0.95                          | 16.29                           | 90%          |
|                 | 8                    | 8                       | HBA, 3×Hbic, RingArom                           | 64.5        | 78.7                    | 14.2                       | 0.78                          | 10.66                           | 90%          |
|                 | 5                    | 10                      | HBA, 3×Hbic, RingArom                           | 72.8        | 78.7                    | 5.9                        | 0.91                          | 5.15                            | 90%          |
|                 | 5                    | 7                       | HBA, 3×Hbic, RingArom                           | 72.6        | 78.7                    | 6.1                        | 0.91                          | 25.5                            | 90%          |
|                 | 5                    | 1                       | HBA, 3×Hbic, RingArom                           | 71.8        | 78.7                    | 6.9                        | 0.93                          | 15.4                            | 90%          |
|                 | 1                    | 2                       | HBA, 2×Hbic, RingArom                           | 74.7        | 78.7                    | 4.0                        | 0.95                          | 19.0                            | 90%          |
|                 | 1                    | 10                      | 2×HBA, Hbic, RingArom                           | 75.4        | 78.7                    | 3.3                        | 0.93                          | 12.0                            | 90%          |
|                 | 4                    | 10                      | 2×HBA, Hbic, RingArom                           | 73.8        | 78.7                    | 4.9                        | 0.90                          | 1.1                             | 90%          |
| 5               | 1                    | 6                       | HBA, Hbic, 2×RingArom                           | 100.3       | 127.7                   | 27.4                       | 0.96                          | 15.6                            | 90%          |
|                 | 2                    | 7                       | HBA, Hbic, 2×RingArom                           | 99.8        | 127.7                   | 27.9                       | 0.97                          | 13.1                            | 90%          |
|                 | <b>2<sup>f</sup></b> | <b>8</b>                | <b>HBA, 2×Hbic, RingArom, 3× EV</b>             | <b>99.8</b> | <b>127.7</b>            | <b>27.9</b>                | <b>0.97</b>                   | <b>23.4</b>                     | <b>90%</b>   |
|                 | 8                    | 1                       | HBA, 3× Hbic, RingArom, EV                      | 90.7        | 127.7                   | 37.0                       | 0.97                          | 2.1                             | 90%          |
|                 | 8                    | 2                       | HBA, 3× Hbic, RingArom, EV                      | 93.1        | 127.7                   | 34.6                       | 0.95                          | 1.7                             | 90%          |
|                 | 7                    | 7                       | HBA, 3× Hbic, RingArom                          | 100.9       | 127.7                   | 26.8                       | 0.86                          | 0.76                            | 90%          |
|                 | 6                    | 8                       | HBA, 3× Hbic, RingArom, 3× EV                   | 98.3        | 127.7                   | 29.4                       | 0.94                          | 29.2                            | 90%          |
|                 | 6                    | 3                       | HBA, 3× Hbic, RingArom, 4× EV                   | 97.4        | 127.7                   | 30.3                       | 0.95                          | 14.8                            | 90%          |
|                 | 6                    | 7                       | HBA, 3× Hbic, RingArom, EV                      | 98.2        | 127.7                   | 29.5                       | 0.94                          | 0.19                            | 90%          |
|                 | 4                    | 2                       | 2×HBA, Hbic, RingArom                           | 92.9        | 127.7                   | 34.8                       | 0.97                          | 5.7                             | 90%          |
|                 | 1                    | 7                       | 2×HBA, Hbic, RingArom                           | 100.4       | 127.7                   | 27.3                       | 0.96                          | 14                              | 90%          |
|                 | 1                    | 1                       | 2×HBA, Hbic, RingArom                           | 99.8        | 127.7                   | 27.9                       | 0.97                          | 28.5                            | 90%          |
| 6               | 4                    | 3                       | HBA, Hbic, 2×RingArom, 2× EV                    | 75.6        | 80.8                    | 5.2                        | 0.96                          | 13.8                            | 90%          |
|                 | 4                    | 8                       | HBA, Hbic, 2× RingArom                          | 76.4        | 80.8                    | 4.4                        | 0.94                          | 2.6                             | 90%          |
|                 | 1                    | 1                       | HBA, Hbic, 2× RingArom                          | 77.6        | 80.8                    | 3.2                        | 0.94                          | 0.06                            | 80%          |
|                 | 8                    | 5                       | HBA, Hbic, 2×RingArom, 2× EV                    | 76.6        | 80.8                    | 4.2                        | 0.87                          | 1.7                             | 90%          |
|                 | 4                    | 10                      | 2×HBA, 3× Hbic, RingArom, 4× EV                 | 76.5        | 80.8                    | 4.3                        | 0.94                          | 12.8                            | 90%          |
|                 | 3                    | 1                       | 2×HBA, Hbic, RingArom                           | 75.7        | 80.8                    | 5.1                        | 0.95                          | 1.1                             | 90%          |
|                 | <b>2<sup>f</sup></b> | <b>7</b>                | <b>HBA, HBD, Hbic, RingArom, 4× EV</b>          | <b>78.0</b> | <b>80.8</b>             | <b>2.8</b>                 | <b>0.93</b>                   | <b>4.9</b>                      | <b>90%</b>   |
|                 | 1                    | 9                       | HBA, HBD, Hbic, RingArom                        | 78.8        | 80.8                    | 2.0                        | 0.91                          | 0.01                            | 90%          |
|                 | 2                    | 8                       | HBA, HBD, Hbic, RingArom, EV                    | 78.0        | 80.8                    | 2.8                        | 0.93                          | 1.5                             | 90%          |

**Table S4.** The performance of the best representatives (cluster centres) of clustered pharmacophore hypothesis generated for CLK4 inhibitors.

| Training Subset | Run <sup>a</sup>     | Hypothesis <sup>b</sup> | Pharmacophoric Features in Generated Hypothesis | Total cost  | Cost of null hypothesis | Residual Cost <sup>c</sup> | R <sub>run</sub> <sup>d</sup> | F <sub>total</sub> <sup>e</sup> | Cat-Scramble |
|-----------------|----------------------|-------------------------|-------------------------------------------------|-------------|-------------------------|----------------------------|-------------------------------|---------------------------------|--------------|
|                 | 2                    | 3                       | HBA, HBD, Hbic, RingArom, EV                    | 77.1        | 80.8                    | 3.7                        | 0.95                          | 3.8                             | 90%          |
|                 | 4                    | 6                       | 2×HBA, 2×Hbic                                   | 97.9        | 124.8                   | 26.9                       | 0.91                          | 8.3                             | 90%          |
|                 | 4                    | 5                       | 2×HBA, 2×Hbic                                   | 98.7        | 124.8                   | 26.1                       | 0.89                          | 2.7                             | 90%          |
|                 | 4                    | 8                       | 2×HBA, 2×Hbic, EV                               | 99.2        | 124.8                   | 25.6                       | 0.89                          | 7.8                             | 90%          |
|                 | 3                    | 9                       | 2×HBA, 3×Hbic                                   | 100.1       | 124.8                   | 24.7                       | 0.88                          | 9.2                             | 90%          |
|                 | 8                    | 5                       | HBA, HBD, 3×Hbic, 2×EV                          | 92.6        | 124.8                   | 32.2                       | 0.90                          | 6.6                             | 90%          |
|                 | 7                    | 3                       | HBA, HBD, 3×Hbic                                | 91.8        | 124.8                   | 33.0                       | 0.92                          | 1.4                             | 90%          |
|                 | 7                    | 10                      | HBA, HBD, 3×Hbic                                | 95.7        | 124.8                   | 29.1                       | 0.87                          | 0.48                            | 90%          |
|                 | 6                    | 5                       | HBA, HBD, 3×Hbic, 3×EV                          | 97.9        | 124.8                   | 26.9                       | 0.92                          | 6.1                             | 90%          |
| 7               | 6                    | 2                       | HBA, HBD, 3×Hbic, 2×EV                          | 96.3        | 124.8                   | 28.5                       | 0.93                          | 3.1                             | 90%          |
|                 | 1                    | 6                       | HBA, HBD, 3×Hbic                                | 99.9        | 124.8                   | 24.9                       | 0.91                          | 1.3                             | 90%          |
|                 | 5                    | 8                       | HBA, HBD, 3×Hbic                                | 98.3        | 124.8                   | 26.5                       | 0.91                          | 0.96                            | 90%          |
|                 | 3                    | 10                      | HBA, HBD, 2×Hbic                                | 100.5       | 124.8                   | 24.3                       | 0.87                          | 0.07                            | 90%          |
|                 | 4                    | 7                       | HBA, HBD, 2×Hbic, 2×EV                          | 99.1        | 124.8                   | 25.7                       | 0.89                          | 0.56                            | 90%          |
|                 | 4                    | 10                      | HBA, HBD, 2×Hbic, EV                            | 99.4        | 124.8                   | 25.4                       | 0.89                          | 0.01                            | 90%          |
|                 | 2                    | 2                       | 2×HBA, HBD, Hbic, EV                            | 97.3        | 124.8                   | 27.5                       | 0.94                          | 22.5                            | 90%          |
|                 | 1                    | 10                      | 2×HBA, HBD, Hbic                                | 100.6       | 124.8                   | 24.2                       | 0.89                          | 1.0                             | 90%          |
|                 | 1                    | 7                       | HBA, Hbic, 2×RingArom                           | 93.6        | 117.7                   | 26.1                       | 0.98                          | 15.6                            | 90%          |
|                 | 2                    | 8                       | HBA, Hbic, 2×RingArom                           | 93.6        | 117.7                   | 24.1                       | 0.98                          | 14.9                            | 90%          |
|                 | 3                    | 3                       | HBA, 2×Hbic, RingArom                           | 90.8        | 117.7                   | 26.9                       | 0.98                          | 3.6                             | 90%          |
|                 | 2                    | 4                       | HBA, 2×Hbic, RingArom                           | 93.3        | 117.7                   | 24.4                       | 0.98                          | 3.6                             | 90%          |
| 8               | 6                    | 3                       | HBA, 3×Hbic, RingArom                           | 90.3        | 117.7                   | 27.4                       | 0.95                          | 10.8                            | 90%          |
|                 | 6                    | 9                       | HBA, 3×Hbic, RingArom                           | 94.1        | 117.7                   | 23.6                       | 0.90                          | 4.5                             | 90%          |
|                 | 5                    | 9                       | HBA, 3×Hbic, RingArom                           | 94.6        | 117.7                   | 23.1                       | 0.92                          | 11.2                            | 90%          |
|                 | 3                    | 1                       | 2×HBA, Hbic, RingArom                           | 90.5        | 117.7                   | 27.2                       | 0.98                          | 5.4                             | 90%          |
|                 | <b>3<sup>f</sup></b> | <b>8</b>                | <b>HBA, HBD, Hbic, RingArom</b>                 | <b>91.3</b> | <b>117.7</b>            | <b>26.4</b>                | <b>0.97</b>                   | <b>1.0</b>                      | <b>90%</b>   |

<sup>a</sup>Correspond to runs in Table S3.

<sup>b</sup>Best models from their respective clusters, as judged based on F-statistic generated by correlating fit values of the whole list of collected compounds with the corresponding bioactivities (table S1). Numbers correspond to rank of each hypothesis in each particular CATALYST automatic pharmacophore generating run.

<sup>c</sup>The difference between the total cost and the cost of the corresponding null hypothesis.

<sup>d</sup>The correlation coefficients between bioactivity estimates and bioactivities of corresponding training compounds in the particular subset.

<sup>e</sup>Fisher statistic calculated based on the linear regression between the fit values of collected inhibitors (1-91, table S1) against pharmacophore hypothesis (employing the "best fit" option) and their respective CLK4 inhibitors bioactivities.

<sup>f</sup>Bolded models represent the criteria of pharmacophores that emerged in the in the successful ML-QSAR models.

**Table S5.** The chemical structures of the ROC-testing set in SMILES format and their corresponding bioactivities.

| ChEMBL code   | Smiles                                                                                                                                                                                                           | IC <sub>50</sub> or Ki | Activity Class |
|---------------|------------------------------------------------------------------------------------------------------------------------------------------------------------------------------------------------------------------|------------------------|----------------|
| CHEMBL1980407 | <chem>[H]n5c(C([H])=C4c3c(c([H])c([H])c(c2c([H])nc([H])c(OC([H])([H])[C@]([H])(N([H])[H])C([H])([H])c1c([H])c([H])c([H])c([H])c1[H])c2[H])c3[H])N([H])C4=O)c([H])c([H])c5[H]</chem>                              | 0.3162                 | Active         |
| CHEMBL1965660 | <chem>O=C(N([H])[H])c2c([H])c(c1nc(nc([H])c1[H])N([H])[H])n([H])c2c3c([H])c([H])c([Cl])c([H])c3[Cl]</chem>                                                                                                       | 0.631                  | Active         |
| CHEMBL1965660 | <chem>O=C(N([H])[H])c2c([H])c(c1nc(nc([H])c1[H])N([H])[H])n([H])c2c3c([H])c([H])c([Cl])c([H])c3[Cl]</chem>                                                                                                       | 0.631                  | Active         |
| CHEMBL2007574 | <chem>[Cl]c1nc(nc(c1[H])c3c([H])n([H])c2nc([H])c([H])c([H])c23)N([H])[H]</chem>                                                                                                                                  | 0.631                  | Active         |
| CHEMBL1973720 | <chem>[Cl]c1nc(nc(c1[H])c3c([H])n([H])c2nc([H])c([H])c([H])c23)N([H])[C@@]4([H])C([H])([H])C([H])([H])[C@@]([H])(N([H])[H])C([H])([H])C4([H])[H]</chem>                                                          | 1                      | Active         |
| CHEMBL1977138 | <chem>N#Cc4c([H])c([H])c3nc([H])n(c2nc(N([H])[C@]([H])(c1c([H])c([H])c([H])c([H])c1[F])C([H])([H])[H])c([H])nc2[H])c3c4[H]</chem>                                                                                | 1                      | Active         |
| CHEMBL1973720 | <chem>[Cl]c1nc(nc(c1[H])c3c([H])n([H])c2nc([H])c([H])c([H])c23)N([H])[C@@]4([H])C([H])([H])C([H])([H])[C@@]([H])(N([H])[H])C([H])([H])C4([H])[H]</chem>                                                          | 1                      | Active         |
| CHEMBL1981133 | <chem>[H]n1c([H])c(c2c1c([H])c([H])c([H])c2[H])C([H])([H])[C@]([H])(N([H])[H])C([H])([H])Oc5c([H])nc([H])c(c4c([H])c([H])c3c([H])nc([H])c([H])c3c4[H])c5[H]</chem>                                               | 1                      | Active         |
| CHEMBL1990162 | <chem>N#Cc5c([H])c([H])c(C(=O)N([H])c4nn([H])c3c([H])c([H])c(c1nn(c1[H])C([H])([H])c2c([H])c([H])c([H])c([H])c2[H])c([H])c34)c([H])c5[H]</chem>                                                                  | 1.259                  | Active         |
| CHEMBL1996980 | <chem>O=C(N([H])[C@]4([H])C([H])([H])C([H])([H])[C@]([H])(N([H])c1nc([Cl])c([H])c(n1)c3c([H])n([H])c2nc([H])c([H])c([H])c23)C([H])([H])C4([H])[H])C([H])([H])N([H])C([H])([H])[H]</chem>                         | 1.259                  | Active         |
| CHEMBL1987448 | <chem>[H]n2c([H])c(c1c([H])c(nc([Cl])c1[H])N([H])[H])c3c2nc([H])c([H])c3[H]</chem>                                                                                                                               | 1.585                  | Active         |
| CHEMBL1983575 | <chem>O=C(N([H])N=C([H])c1c([H])c([Br])c(O[H])c([Br])c1[H])c2c([H])c([H])c([H])c([H])c2[H]</chem>                                                                                                                | 1.585                  | Active         |
| CHEMBL1967252 | <chem>[H]n1nc(c3c1c([H])c([H])c(c2c([H])c([H])c([H])nc2[H])c3[H])C([H])([H])[H]</chem>                                                                                                                           | 1.995                  | Active         |
| CHEMBL1980562 | <chem>O=[S](=O)(N([H])[C@]4([H])C([H])([H])C([H])([H])[C@]([H])(N([H])c1nc([Cl])c([H])c(n1)c3c([H])n([H])c2nc([H])c([H])c([H])c23)C([H])([H])C4([H])[H])C([H])([H])[H]</chem>                                    | 1.995                  | Active         |
| CHEMBL1982271 | <chem>O=C(N([H])[C@]4([H])C([H])([H])C([H])([H])[C@]([H])(N([H])c1nc([Cl])c([H])c(n1)c3c([H])n([H])c2nc([H])c([H])c([H])c23)C([H])([H])C4([H])[H])C([H])([H])N(C([H])([H])[H])C([H])([H])[H]</chem>              | 1.995                  | Active         |
| CHEMBL1980995 | <chem>O=C8c2c(c1c7c(n5c1c4c2c3c([H])c([H])c([H])c([H])c3n4[C@@]6([H])O[C@]5(C([H])([H])[H])[C@@]([H])(OC([H])([H])[H])[C@@]([H])(N([H])C([H])([H])[H])C6([H])[H])c([H])c([H])c([H])c7[H])C([H])([H])N8[H]</chem> | 1.995                  | Active         |
| CHEMBL2002613 | <chem>O=C(c1c([H])c(OC([H])([H])[H])c([H])c(OC([H])([H])[H])c1[H])N([H])c5nn([H])c4c([H])c([H])c(c2nnn(c2[H])C([H])([H])c3c([H])c([H])c([H])c3[H])c([H])c45</chem>                                               | 2.512                  | Active         |
| CHEMBL1969151 | <chem>[Cl]c1nc(nc(c1[H])c3c([H])n([H])c2nc([H])c([H])c([H])c23)N([H])[C@@]4([H])C([H])([H])C([H])([H])[C@@]([H])(N(C([H])([H])[H])C([H])([H])[H])C4([H])[H]</chem>                                               | 2.512                  | Active         |



|               |                                                                                                                                                                  |       |        |
|---------------|------------------------------------------------------------------------------------------------------------------------------------------------------------------|-------|--------|
| CHEMBL1974935 | [H]n1c([H])c(c2c1c([H])c([H])c([H])c2[H])C([H])([H])[C@@]([H])(N([H])[H])C([H])([H])O)c4c([H])nc([H])c(C([H])=C([H])c3c([H])c([H])nc([H])c3[H])c4[H]             | 3.162 | Active |
| CHEMBL1990912 | [H]OC([H])([H])C([H])([H])N([H])c1nc([H])c3c(c1[H])c([H])c(c2c([H])c([H])c([H])nc2[H])c([H])c3[H]                                                                | 3.162 | Active |
| CHEMBL1999279 | [H]n3c([H])c(c1nc(nc([H])c1[H])N([H])C(c2c([H])c([H])c([H])c([H])c2[H])(C([H])([H])[H])C([H])([H])[H])c4c3nc([H])c([H])c4[H]                                     | 3.162 | Active |
| CHEMBL1987948 | O=[S](=O)(N([H])[C@]4([H])C([H])([H])C([H])([H])C([H])([H])[C@]([H])(N([H])c1nc([Cl])c([H])c(n1)c3c([H])n([H])c2nc([H])c([H])c([H])c23)C4([H])[H])C([H])([H])[H] | 3.162 | Active |
| CHEMBL1971951 | O=C(N([H])[H])c2c([H])c([H])c(c1nc(nc([H])c1[H])N([H])[H])c([H])c2N3C([H])([H])C([H])([H])C([H])([H])C([H])([H])C3([H])[H]                                       | 3.162 | Active |
| CHEMBL1999484 | [H]C([H])([H])N([H])c1nc(c([s]1)c2nc(nc([H])c2[H])N([H])c4c([H])c([H])c(N3C([H])([H])C([H])([H])N([H])C([H])([H])C3([H])[H])c([H])c4[H])C([H])([H])[H]           | 3.162 | Active |
| CHEMBL1983157 | [H]n3nc(N([H])[H])c2c(N([H])C([H])([H])C([H])([H])C([H])([H])C([H])([H])[H])c([H])c(c1c([H])c([H])nc([H])c1[H])c([H])c23                                         | 3.162 | Active |
| CHEMBL1977128 | N#Cc5c([H])c([H])c([H])c(C(=O)N([H])c4nn([H])c3c([H])c([H])c(c1nmm(c1[H])C([H])([H])c2c([H])c([H])c([H])c([H])c2[H])c([H])c34)c5[H]                              | 3.981 | Active |
| CHEMBL2005718 | O=[S](=O)(N([H])C([H])([H])C([H])([H])N([H])c1nc([Cl])c([H])c(c1[H])c3c([H])n([H])c2nc([H])c([H])c([H])c23)C([H])([H])[H]                                        | 3.981 | Active |
| CHEMBL1375640 | [Cl]c3c(OC([H])([H])c1nc(c([s]1)c2nc(nc([H])c2[H])N([H])[H])C([H])([H])[H])c([H])c([H])c([H])c3[H]                                                               | 3.981 | Active |
| CHEMBL1997643 | O=C(c1c(OC([H])([H])[H])c([H])c([H])c([H])c1[H])N([H])c5nn([H])c4c([H])c([H])c(c2nmm(c2[H])C([H])([H])c3c([H])c([H])c([H])c([H])c3[H])c([H])c45                  | 3.981 | Active |
| CHEMBL225519  | O=C2N([H])C([H])([H])C([H])([H])c3n([H])c(c1c([H])c([H])nc([H])c1[H])c([H])c23                                                                                   | 3.981 | Active |
| CHEMBL1996339 | [H]n2c([H])c(c1c([H])c(nc([Cl])c1[H])N([H])C([H])([H])C([H])=C([H])[H])c3c2nc([H])c([H])c3[H]                                                                    | 3.981 | Active |
| CHEMBL1982400 | [H]n2nc(c1c([H])c([H])c([H])c([H])c1[H])c5c2c([H])c([H])c(c3nmm(c3[H])C([H])([H])c4c([H])c([H])c([H])c([H])c4[H])c5[H]                                           | 3.981 | Active |
| CHEMBL1997924 | [H]n4nc(N([H])c1nc(nc2c1[s]c([H])c2[H])N([H])C([H])([H])c3c([H])c([H])c([H])c([H])c3[H])c([H])c4C5([H])C([H])([H])C5([H])[H]                                     | 3.981 | Active |
| CHEMBL1682554 | [H]n1nc([H])c4c1c([H])c([H])c(c3nc2nc([H])c([H])c([H])n2c3N([H])C([H])([H])C([H])([H])C([H])([H])C([H])([H])[H])c4[H]                                            | 3.981 | Active |
| CHEMBL1969473 | [H]n1nc([H])c5c1c([H])c([H])c(c2nmm(c2c3c([H])c([H])c([H])c([H])c3[H])C([H])([H])c4c([H])c([H])c([H])c([H])c4[H])c5[H]                                           | 5.012 | Active |
| CHEMBL1988163 | O=[S](=O)(N([H])[H])c4c([H])c([H])c([H])c(N([H])c3nc([H])c2c([H])c([H])n(c1c([H])c([H])c([H])c([H])c1[H])c2n3)c4[H]                                              | 5.012 | Active |
| CHEMBL1998121 | O=C(N([H])c2c([H])c([H])c1n([H])nc([H])c1c2[H])[C@@]([H])(c3c([H])c([H])c([Cl])c([Cl])c3[H])C([H])([H])C([H])([H])N([H])[H]                                      | 5.012 | Active |
| CHEMBL1988331 | [H]n3c([H])c(c1c([H])c(nc([Cl])c1[H])N([H])C([H])([H])c2c([H])c([H])c([H])c(c2C1([H])([H])[H])C([H])([H])[H])c4c3nc([H])c([H])c4[H]                              | 5.012 | Active |
| CHEMBL1964804 | O=[S](=O)(N([H])C([H])([H])C([H])([H])O)c3c([H])nc([H])c(c2c([H])c([H])c1c([H])nc([H])c([H])c1c2[H])c3[H])C([H])([H])[H]                                         | 5.012 | Active |

|               |                                                                                                                                                                                                                                    |       |        |
|---------------|------------------------------------------------------------------------------------------------------------------------------------------------------------------------------------------------------------------------------------|-------|--------|
| CHEMBL1974250 | <chem>O=C(N([H])C([H])([H])c1c([H])c([H])c([H])c([H])c1[H])c3c([H])n([H])n2c(=O)c([H])c(nc23)c4c([H])c([H])nc([H])c4[H]</chem>                                                                                                     | 5.012 | Active |
| CHEMBL1985723 | <chem>[H]n2c([H])c(c1c([H])c(nc([Cl])c1[H])N([H])C([H])([H])C(C([H])([H])[H])C([H])([H])[H])C([H])([H])[H])C([H])([H])N([H])[H])c3c2nc([H])c([H])c3[H]</chem>                                                                      | 5.012 | Active |
| CHEMBL1979773 | <chem>O=C(N(C([H])([H])[H])C([H])([H])C([H])([H])N([H])[H])c4c([H])c([H])c([H])c(n1nc(c([H])c1N([H])C(=O)N([H])c3c([H])c([H])c([H])c2c([H])c([H])c([H])c([H])c([H])c23)C(C([H])([H])[H])C([H])([H])[H])C([H])([H])[H])c4[H]</chem> | 5.012 | Active |
| CHEMBL1971172 | <chem>[H]n2c([H])c(c1c([H])c(nc([Cl])c1[H])N([H])C([H])([H])C(C([H])([H])[H])C([H])([H])[H])C([H])([H])[H])C([H])([H])N([H])[S](=O)(=O)C([H])([H])[H])c3c2nc([H])c([H])c3[H]</chem>                                                | 5.012 | Active |
| CHEMBL2005387 | <chem>[H]n2c([H])c(c1c([H])c(nc([Cl])c1[H])N([H])C([H])([H])C(O[H])C([H])([H])[H])C([H])([H])[H])c3c2nc([H])c([H])c3[H]</chem>                                                                                                     | 5.012 | Active |
| CHEMBL2002346 | <chem>[H]n3c([H])c(c2nc([H])nc(N([H])C([H])([H])c1c([H])c([H])c([H])c([H])c1[H])c2[H])c4c3nc([H])c([H])c4[H]</chem>                                                                                                                | 5.012 | Active |
| CHEMBL1987679 | <chem>[H]n5c4c([H])c([H])c(c3c([H])nc([H])c(OC([H])([H])[C@@]([H])N([H])[H])C([H])([H])c2c([H])n([H])c1c([H])c([H])c([H])c([H])c12)c3[H])c([H])c4oc5=O</chem>                                                                      | 5.012 | Active |
| CHEMBL1972290 | <chem>[H]n2c([H])c(c1c([H])c(nc([Cl])c1[H])N([H])C([H])([H])C([H])([H])N([H])[H])c3c2nc([H])c([H])c3[H]</chem>                                                                                                                     | 5.012 | Active |
| CHEMBL1983932 | <chem>O=C(N([H])c2c1c([H])c([H])c(OC([H])([H])[H])c([H])c1nc([H])c2[H])N([H])c3nc([Br])c([H])c([H])c3[H]</chem>                                                                                                                    | 5.012 | Active |
| CHEMBL1998068 | <chem>[H]n2c([H])c(c1c([H])c(nc([Cl])c1[H])N([H])[C@]([H])C([H])([H])OC([H])([H])[H])C([H])([H])[H])c3c2nc([H])c([H])c3[H]</chem>                                                                                                  | 6.31  | Active |
| CHEMBL1968930 | <chem>[Cl]c1nc(nc(c1[H])c3c([H])n([H])c2nc([H])c([H])c([H])c23)N([H])C([H])([H])C(C([H])([H])[H])C([H])([H])[H])C([H])([H])N([H])[H]</chem>                                                                                        | 6.31  | Active |
| CHEMBL1997129 | <chem>O=C3N([H])C([H])([H])C([H])([H])c4n([H])c(c2c([H])c([H])nc(C([H])=C([H])c1c([H])c([H])c([H])c([H])c1[H])c2[H])c([H])c34</chem>                                                                                               | 6.31  | Active |
| CHEMBL1993877 | <chem>[H]C#Cc2c([H])n(c1nc([H])nc(N([H])[H])c12)C3([H])C([H])([H])C([H])([H])C([H])([H])C3([H])[H]</chem>                                                                                                                          | 6.31  | Active |
| CHEMBL1986499 | <chem>[H]n1nc(N([H])[H])c5c1c([H])c([H])c(c2nnn(c2c3c([H])c([H])c([F])c([H])c3[H])C([H])([H])c4c([H])c([H])c([H])c4[H])c5[H]</chem>                                                                                                | 6.31  | Active |
| CHEMBL2005936 | <chem>O=C(N([H])c5nn([H])c4c([H])c([H])c(c1nnn(c1c2c([H])c([H])c([H])c([H])c2[H])C([H])([H])c3c([H])c([H])c([H])c3[H])c([H])c45)C([H])([H])C([H])([H])C([H])([H])[H]</chem>                                                        | 6.31  | Active |
| CHEMBL1995813 | <chem>[H]n3c([H])c(c1nc(nc([H])c1[H])N([H])[C@@]2([H])[C@@]([H])N([H])[H])C([H])([H])C([H])([H])C([H])([H])C2([H])[H])c4c3nc([H])c([H])c4[H]</chem>                                                                                | 6.31  | Active |
| CHEMBL1995712 | <chem>O=C(N([H])[C@]4([H])C([H])([H])C([H])([H])C([H])([H])[C@]([H])N([H])c1nc([Cl])c([H])c(n1)c3c([H])n([H])c2nc([H])c([H])c([H])c23)C4([H])[H])C([H])([H])N(C([H])([H])[H])C([H])([H])[H]</chem>                                 | 6.31  | Active |
| CHEMBL1995932 | <chem>[H]n3c([H])c(c2nc([H])nc(N([H])C([H])([H])c1c([H])c([H])c([H])c(c1[H])C([H])([H])[H])c2[H])c4c3nc([H])c([H])c4[H]</chem>                                                                                                     | 6.31  | Active |
| CHEMBL1973540 | <chem>O=C3N([H])c2c([H])c([H])c1nc([H])[s]c1c2/C3=C(/[H])N([H])c4c([H])c([H])c(c([H])c4[H])[S](=O)(=O)N([H])c5nc([H])c([H])c([H])c5[H]</chem>                                                                                      | 6.31  | Active |
| CHEMBL1972158 | <chem>[H]n1nc(N([H])[H])c5c1c([H])c([H])c(c2nnn(c2c3c([H])c([H])c([H])c([H])c3[H])C([H])([H])c4c([H])c([H])c([H])c4[H])c5[H]</chem>                                                                                                | 7.943 | Active |
| CHEMBL1983595 | <chem>O=C(N([H])c4nn([H])c3c([H])c([H])c(c1nnn(c1[H])C([H])([H])c2c([H])c([H])c([H])c([H])c2[H])c([H])c34)c5c([H])c([H])c([H])c([H])c5[H]</chem>                                                                                   | 7.943 | Active |

|               |                                                                                                                                                                                            |       |        |
|---------------|--------------------------------------------------------------------------------------------------------------------------------------------------------------------------------------------|-------|--------|
| CHEMBL1988581 | <chem>O=c1c([H])c(nc2n1c([H])c([H])c(c2O[H])C([H])([H])N(C([H])([H])[H])C([H])([H])[H])C([H])([H])[H]</chem>                                                                               | 7.943 | Active |
| CHEMBL1992922 | <chem>[H]n2c1nc([H])nc(N([H])C([H])(C([H])([H])O[H])C([H])([H])O[H])c1c(c2[H])c3c([H])c([H])c([H])c([H])c3[H]</chem>                                                                       | 7.943 | Active |
| CHEMBL1983315 | <chem>[H]n1nc(c5c1c([H])c([H])c(c2nnn(c2c3c(c([H])c([H])c([H])c3[H])C([H])([H])[H])C([H])([H])c4c([H])c([H])c([H])c4[H])c5[H])C([H])([H])[H]</chem>                                        | 7.943 | Active |
| CHEMBL1998470 | <chem>O=C(N([H])c1nc([Cl])c([H])c(c1[H])c3c([H])n([H])c2nc([H])c([H])c([H])c23)C([H])([H])C([H])([H])C([H])([H])[H]</chem>                                                                 | 7.943 | Active |
| CHEMBL1975440 | <chem>O=C(N([H])[H])c4c([H])c([H])c(N([H])c3nc([H])nc2n([H])c([H])c(c1c([H])c([H])c([H])c([H])c1[H])c23)c([H])c4[H]</chem>                                                                 | 10    | Active |
| CHEMBL226232  | <chem>O=C2N([H])C([H])([H])C([H])([H])c3n([H])c(c1c([H])c([H])nc([Cl])c1[H])c([H])c23</chem>                                                                                               | 10    | Active |
| CHEMBL1996447 | <chem>[H]n3nc(N([H])[H])c2c(OC([H])([H])C([H])([H])C([H])([H])C([H])([H])C([H])([H])c([H])c(c1c([H])c([H])nc([H])c1[H])c([H])c23</chem>                                                    | 10    | Active |
| CHEMBL1985654 | <chem>[H]n2c([H])c(c1c([H])c(nc([Cl])c1[H])N(C([H])([H])C([H])([H])OC([H])([H])[H])C([H])([H])C([H])([H])OC([H])([H])[H])c3c2nc([H])c([H])c3[H]</chem>                                     | 10    | Active |
| CHEMBL1991410 | <chem>O=C(N([H])c1nc([Cl])c([H])c(c1[H])c3c([H])n([H])c2nc([H])c([H])c([H])c23)c4c([F])c([H])c([H])c([H])c4[F]</chem>                                                                      | 10    | Active |
| CHEMBL1983855 | <chem>[H]n1nc(c3c1c([H])c([H])c(c2c([H])nc([H])c(OC([H])([H])C([H])([H])N([H])C([H])([H])[H])c2[H])c3[H])C([H])([H])[H]</chem>                                                             | 10    | Active |
| CHEMBL2003637 | <chem>O=[N+]([O-])c4c([H])c([H])c([H])c(c2nnc1c([H])c([H])c(nn12)N3C([H])([H])C([H])([H])C([H])([H])C([H])([H])C3([H])[H])c4[H]</chem>                                                     | 10    | Active |
| CHEMBL1977223 | <chem>O=C(N([H])c4nn([H])c3c([H])c([H])c(c1nnn(c1[H])C([H])([H])c2c([H])c([H])c([H])c([H])c2[H])c([H])c34)C([H])([H])C([H])([H])C([H])([H])[H]</chem>                                      | 10    | Active |
| CHEMBL1190711 | <chem>O=C(c1c(nc([H])c([H])c1[H])N([H])c3nc(c2c([H])c([H])c(OC([H])([H])[H])c(OC([H])([H])[H])c2[H])c([H])c4nc([H])c([H])n34)N([H])[H]</chem>                                              | 10    | Active |
| CHEMBL1682552 | <chem>[H]n1nc([H])c5c1c([H])c([H])c(c3nc2nc([H])c([H])c([H])n2c3N([H])C4([H])C([H])([H])C([H])([H])C([H])([H])C([H])([H])C4([H])c5[H]</chem>                                               | 10    | Active |
| CHEMBL1995811 | <chem>O=C(N([H])c4nn([H])c3c([H])c([H])c(c1nnn(c1[H])C([H])([H])c2c([H])c([H])c([H])c([H])c2[H])c([H])c34)c5c([H])c([F])c([H])c([H])c5[F]</chem>                                           | 10    | Active |
| CHEMBL2007002 | <chem>[H]n2nc(C(=O)N([H])c1c([H])c([H])c([H])c([H])c1[H])c4c2c([H])c([H])c(c3c([H])c(OC([H])([H])[H])c(O[H])c([H])c3[H])c4[H]</chem>                                                       | 10    | Active |
| CHEMBL1989646 | <chem>[H]n1nc(N([H])[H])c4c1c([H])c([H])c(c2nnn(c2C([H])([H])[H])C([H])([H])c3c([H])c([H])c([H])c([H])c3[H])c4[H]</chem>                                                                   | 10    | Active |
| CHEMBL1983715 | <chem>O=C(N4C([H])([H])C([H])([H])N(c3c([H])c([H])c(N([H])c1nc([H])c([H])c(n1)c2[s]c(nc2C([H])([H])[H])N([H])C([H])([H])C([H])([H])c([H])c3[H])C([H])([H])C4([H])[H])C([H])([H])[H]</chem> | 10    | Active |
| CHEMBL1682358 | <chem>[H]n1nc(N([H])[H])c4c1c([H])c([H])c(c2onc(c2[H])C([H])([H])c3c([H])c([H])c([H])c([H])c3[H])c4[H]</chem>                                                                              | 10    | Active |
| CHEMBL1992937 | <chem>O=[N+]([O-])c3c([H])c([H])c2nc(N([H])c1nc([H])c(c([H])c1[H])C([H])([H])[H])n([H])c2c3[H]</chem>                                                                                      | 10    | Active |
| CHEMBL1996066 | <chem>N#Cc4c([H])c([H])c3nc(N([H])[H])n(c2nc(c1c([H])c([H])c([H])c([H])c1[H])c([H])c([H])[s]2)c3c4[H]</chem>                                                                               | 10    | Active |

|               |                                                                                                                                                                         |       |        |
|---------------|-------------------------------------------------------------------------------------------------------------------------------------------------------------------------|-------|--------|
| CHEMBL2006450 | O=C(N([H])c1nc([Cl])c([H])c(c1[H])c3c([H])n([H])c2nc([H])c([H])c([H])c23)C([H])([H])C([H])([H])C([H])([H])C([H])([H])[H]                                                | 12.59 | Active |
| CHEMBL1999811 | O=C(N([H])N=C([H])c1c([H])c([H])c(O[H])c([H])c1O[H])N([H])c3c([H])c([H])c([H])c2n[s]nc23                                                                                | 12.59 | Active |
| CHEMBL2003229 | [H]n3nc(N([H])[H])c2c(N(C([H])([H])[H])C([H])([H])[H])c([H])c(c1c([H])c([H])nc([H])c1[H])c([H])c23                                                                      | 12.59 | Active |
| CHEMBL1966343 | [H]n1nc(N([H])[H])c3c1c([H])c([H])c(c2onc(c2[H])C([H])([H])C([H])(C([H])([H])[H])C([H])([H])[H])c3[H]                                                                   | 12.59 | Active |
| CHEMBL1965702 | [Cl]c1nc(nc(c1[H])c3c([H])n([H])c2nc([H])c([H])c([H])c23)N([H])[C@@]4([H])C([H])([H])C([H])([H])C([H])([H])[C@@]([H])(N(C([H])([H])[H])C([H])([H])[H])C4([H])[H]        | 12.59 | Active |
| CHEMBL396523  | O=C(O[H])c1c([H])c([H])c([H])c([H])c1N([H])c2nc(nc([H])c2[H])N([H])c4c([H])c([H])c3n([H])nc([H])c3c4[H]                                                                 | 12.59 | Active |
| CHEMBL2002456 | [H]n3nc(N([H])[H])c2c(OC(C([H])([H])[H])C([H])([H])[H])C([H])([H])[H])c([H])c(c1c([H])c([H])nc([H])c1[H])c([H])c23                                                      | 12.59 | Active |
| CHEMBL1241473 | O=[N+](O-<br>)c1c([H])nc(nc1N([H])c2c([H])c([H])c([H])c([H])c2C(=O)N([H])[H])N([H])c3c([H])c(OC([H])([H])[H])c(OC([H])([H])[H])c(OC                                     | 12.59 | Active |
| CHEMBL1975128 | [H]n1nc(N([H])[H])c4c1c([H])c([H])c(c2nnn(c2[I])C([H])([H])c3c([H])c([H])c([H])c([H])c3[H])c4[H]                                                                        | 12.59 | Active |
| CHEMBL1966816 | O=C(N([H])c1nc(c([H])c([H])c1[H])C([F])([F])[F])N([H])c3c([H])c([H])nc2c([F])c([H])c([H])c([H])c23                                                                      | 12.59 | Active |
| CHEMBL1682540 | [H]n1nc([H])c4c1c([H])c([H])c(c3nc2nc([H])c([H])c([H])n2c3[H])c4[H]                                                                                                     | 12.59 | Active |
| CHEMBL2003682 | O=c2c([H])c(nc(N([H])C([H])([H])c1c([H])c([F])c([H])c([F])c1[H])n2[H])c3c([H])c([H])nc([H])c3[H]                                                                        | 12.59 | Active |
| CHEMBL1976090 | [H]N([H])c1nc([H])nc2c1[s]c3nc([H])nc(N([H])[H])c23                                                                                                                     | 12.59 | Active |
|               |                                                                                                                                                                         |       |        |
| CHEMBL1979176 | O=C(N([H])c2c1c([H])c([H])c(OC([H])([H])[H])c([H])c1nc([H])c2[H])N([H])c3nc([H])c([H])c(c3[H])C([F])([F])[F]                                                            | 15.85 | Active |
| CHEMBL1996791 | [I]c1nn(c2nc([H])nc(N([H])[H])c12)[C@]3([H])C([H])([H])C([H])([H])[C@]([H])(O[H])C([H])([H])C3([H])[H]                                                                  | 15.85 | Active |
| CHEMBL1993584 | [H]n1c([H])c(c2c1c([H])c([H])c([H])c2[H])C([H])([H])[C@]([H])(O[H])C([H])([H])Oc4c([H])nc([H])c(C([H])=C([H])c3c([H])c([H])nc([H])c3[H])c4[H]                           | 15.85 | Active |
| CHEMBL1987535 | O=C(N([H])C([H])([H])C([H])([H])c1[s]c([H])c([H])c1[H])N4C([H])([H])C([H])=C(c3c([H])n([H])c2nc([H])c([H])c([H])c23)C([H])([H])C4([H])[H]                               | 15.85 | Active |
| CHEMBL2006765 | O=C(N([H])C([H])([H])C([H])([H])C([H])([H])[H])c3c([H])c([H])c(N([H])c2nc(N([H])C([H])([H])C([F])([F])[F])c1c([H])c([H])n([H])c1n2)c([H])c3[H]                          | 15.85 | Active |
| CHEMBL1967992 | N#Cc2c([H])c([H])c(c1c([H])c([H])nc([H])c1[H])c([H])c2N([H])C([H])([H])c3c([H])c([H])c([H])c([H])c3[H]                                                                  | 15.85 | Active |
| CHEMBL1973516 | N#Cc1c([H])nc(nc1N([H])c3c([H])c([H])c2n([H])nc([H])c2c3[H])N([H])c5c([H])c([H])c(N4C([H])([H])C([H])([H])N(C([H])([H])C([H])([H])[H])C([H])([H])C4([H])[H])c([H])c5[H] | 15.85 | Active |

|               |                                                                                                                                                                                                                                               |       |        |
|---------------|-----------------------------------------------------------------------------------------------------------------------------------------------------------------------------------------------------------------------------------------------|-------|--------|
| CHEMBL458997  | O=C(N([H])C([H])([H])[H])c1c([H])c([H])c([H])c([H])c1N([H])c2nc(nc([H])c2[Cl])N([H])c4c([H])c([H])c(N3C([H])([H])C([H])([H])OC([H])([H])C3([H])[H])c([H])c4OC([H])([H])[H]                                                                    | 15.85 | Active |
| CHEMBL210887  | O=C(N([H])c2nc1c([H])c([H])c([H])c([H])c1n2C([H])([H])C([H])([H])C([H])([H])O[H])c3c([H])c([H])c([H])c([N+](=O)[O-])c3[H]                                                                                                                     | 15.85 | Active |
| CHEMBL1982957 | O=C(N([H])[H])c4c([H])c([H])c([H])c(c3c([H])nc2n([H])c([H])c(c1c([H])c([H])c([H])c([H])c1[H])c2c3[H])c4[H]                                                                                                                                    | 15.85 | Active |
| CHEMBL1976455 | O=C(N([H])c1nc([H])c([H])nc1[H])N([H])c3c([H])c([H])nc2c([H])c([H])c(c([H])c23)C([F])([F])[F]                                                                                                                                                 | 19.95 | Active |
| CHEMBL189963  | O=C(c2c(c1c([H])nc(nc1n(c2=O)C3([H])C([H])([H])C([H])([H])C([H])([H])C3([H])[H])N([H])c4nc([H])c(c([H])c4[H])N5C([H])([H])C([H])([H])N([H])C([H])([H])C5([H])[H])C([H])([H])C([H])([H])C([H])([H])[H]                                         | 19.95 | Active |
| CHEMBL461876  | [F]c5c([H])c([H])c([H])c(N([H])c1nc(nc2c1c([H])c([H])n2[H])N([H])c3c(OC([H])([H])[H])c([H])c4c(c3[H])N(C(=O)C([H])([H])N(C([H])([H])[H])C([H])([H])C4([H])[H])c5C(=O)N([H])[H]                                                                | 19.95 | Active |
| CHEMBL2000071 | [H]n2c1nc([H])nc(N([H])C([H])([H])C([H])([H])C([H])([H])O[H])c1c(c2[H])c3c([H])c([H])c([H])c([H])c3[H]                                                                                                                                        | 19.95 | Active |
| CHEMBL340384  | O=C(N([H])[H])c4c([H])n(c1c([H])c([H])c(O[H])c([H])c1[Cl])c3c([H])c(c2c([H])c([H])nc([H])c2[H])c([H])c([H])c3c4=O                                                                                                                             | 19.95 | Active |
| CHEMBL1993904 | O=C(N([H])[H])c1[s]c5c(c1[H])c(c4c([H])c([H])c(N([H])c3nc2c([H])c([H])c([H])c([H])c2o3)c([H])c4[H])c([H])nc5N([H])[H]                                                                                                                         | 19.95 | Active |
| CHEMBL509032  | [Cl]c1c([H])nc(nc1N([H])c2c([H])c([H])c([H])c2[S](=O)(=O)C([H])(C([H])([H])[H])C([H])([H])[H])N([H])c5c(OC([H])([H])c([H])c([H])c(N4C([H])([H])C([H])([H])C@]([H])(N3C([H])([H])C([H])([H])N(C([H])([H])[H])C([H])([H])C3([H])[H])C([H])([H]) | 19.95 | Active |
| CHEMBL1968459 | [H]n2c([H])c(c1nc([H])nc(N([H])C([H])([H])C([H])([H])C([H])([H])C([H])([H])[H])c1[H])c3c2nc([H])c([H])c3[H]                                                                                                                                   | 19.95 | Active |
| CHEMBL1991674 | [Cl]c2nc(nc(N([H])[C@@]1([H])C([H])([H])C([H])([H])[C@@]([H])(O[H])C([H])([H])C1([H])[H])c2[H])c4c([H])n([H])c3nc([H])c([H])c([H])c34                                                                                                         | 19.95 | Active |
| CHEMBL1958401 | O=c2c([H])c(nc(N([H])C1([H])C([H])([H])C([H])([H])C([H])([H])C([H])([H])C1([H])[H])n2[H])c3c([H])c([H])nc([H])c3[H]                                                                                                                           | 19.95 | Active |
| CHEMBL1973359 | O=C(N([H])[H])c3c([H])c([H])c2nc(c1oc(c([H])c1[H])N+)(=O)[O-])c([H])n2c3[H]                                                                                                                                                                   | 19.95 | Active |
| CHEMBL1973516 | N#Cc1c([H])nc(nc1N([H])c3c([H])c([H])c2n([H])nc([H])c2c3[H])N([H])c5c([H])c([H])c(N4C([H])([H])C([H])([H])N(C([H])([H])C([H])([H])[H])C([H])([H])C4([H])[H])c([H])c5[H]                                                                       | 19.95 | Active |
| CHEMBL1985406 | O=C(N([H])c3nn([H])c2c([H])c([H])c(c1c([H])c([H])c([H])c([F])c1[F])c([H])c23)C([H])([H])C([H])([H])C([H])([H])[H]                                                                                                                             | 19.95 | Active |
| CHEMBL1971289 | O=C1C([S]/C(=N\H)N1[H])=C([H])c2c([H])c([H])c(OC([H])([H])C([H])([H])[H])c([H])c2O[H]                                                                                                                                                         | 19.95 | Active |
| CHEMBL189963  | O=C(c2c(c1c([H])nc(nc1n(c2=O)C3([H])C([H])([H])C([H])([H])C([H])([H])C3([H])[H])N([H])c4nc([H])c(c([H])c4[H])N5C([H])([H])C([H])([H])N([H])C([H])([H])C5([H])[H])C([H])([H])C([H])([H])C([H])([H])[H]                                         | 19.95 | Active |
| CHEMBL1985095 | O=C(N([H])[H])C([H])([H])n5c([H])c(c4c([H])c(c1[s]c2c(c1[H])c([H])c([H])c([H])c2[H])c3n([H])nc([H])c3c4[H])c6nc(nc([H])c56)N([H])[H]                                                                                                          | 25.12 | Active |
| CHEMBL1993722 | [H]n1nc(N([H])[H])c2c1c([H])c([H])c([H])c2c4c([H])c([H])c(N([H])C(=O)N([H])c3c([H])c(C(=O)O[H])c([H])c([H])c3[F])c([H])c4[H]                                                                                                                  | 25.12 | Active |
| CHEMBL1991725 | O=C(N([H])[C@]([H])(C([H])([H])O)c3c([H])nc([H])c(c2c([H])c([H])c1c([H])nc([H])c([H])c1c2[H])c3[H])C([H])([H])c5c([H])n([H])c4c([H])c([H])c([H])c([H])c45)C([H])([H])N(C([H])([H])[H])C([H])([H])[H]                                          | 25.12 | Active |

|               |                                                                                                                                                                                                              |       |        |
|---------------|--------------------------------------------------------------------------------------------------------------------------------------------------------------------------------------------------------------|-------|--------|
| CHEMBL1989293 | <chem>O=C3N([H])c1c([H])c([H])c([H])c([H])c1N([H])c4c([H])c(c2c([H])c([H])nc([H])c2[F])c([H])c([H])c34</chem>                                                                                                | 25.12 | Active |
| CHEMBL2000354 | <chem>O=C2C([S]/C(=N)c1c([H])c([H])c([H])c([H])c1[H])N2[H])=C([H])c3c([H])c([H])c(OC([H])([H])[H])c(O[H])c3[H]</chem>                                                                                        | 25.12 | Active |
| CHEMBL1979690 | <chem>[Cl]c1c([H])nc(nc1N([H])c3c([H])c([H])c2n([H])nc([H])c2c3[H])N([H])c5c([H])c([H])c(N4C([H])([H])C([H])([H])N(C([H])([H])[H])C([H])([H])C4([H])[H])c([H])c5[H]</chem>                                   | 25.12 | Active |
| CHEMBL1973868 | <chem>[H]Oc3c([H])nc2c([H])c([H])c(c1c([H])c([H])nc([H])c1[H])c([H])c2c3[H]</chem>                                                                                                                           | 25.12 | Active |
| CHEMBL1967998 | <chem>[Cl]c1c([H])nc(nc1N([H])c3c([H])c([H])c2n([H])nc([H])c2c3[H])N([H])c5c([H])c([H])c(N4C([H])([H])C([H])([H])N(C([H])([H])C([H])([H])[H])C([H])([H])C4([H])[H])c([H])c5[H]</chem>                        | 25.12 | Active |
| CHEMBL1973098 | <chem>[S]=C2[S]/C(=C([H])c1c([H])c(OC([H])([H])[H])c(O[H])c([H])c1[H])C(=O)N2[H]</chem>                                                                                                                      | 25.12 | Active |
| CHEMBL1983589 | <chem>[Cl]c2nc(nc(N([H])[C@@]1([H])C([H])([H])C([H])([H])[C@@]([H])N([H])[H])C([H])([H])C1([H])[H])c2[H])c4c([H])n([H])c3nc([H])c([H])c([H])c34</chem>                                                       | 25.12 | Active |
| CHEMBL1993413 | <chem>O=C(N([H])c1nc([Cl])c([H])c(c1[H])c3c([H])n([H])c2nc([H])c([H])c([H])c23)c4c([H])c([H])c([H])c([H])c4[H]</chem>                                                                                        | 25.12 | Active |
| CHEMBL1991734 | <chem>[H]C([H])([H])N3c1c([H])c([H])c(N([H])[H])c([H])c1C([H])(c2c([H])c([H])c([H])c([H])c2[H])c4c([H])c(N([H])[H])c([H])c([H])c34</chem>                                                                    | 25.12 | Active |
| CHEMBL1977749 | <chem>[H]C([H])=C([H])C([H])([H])c2c([H])c([H])c([H])c1c(=NO[H])c([H])c(oc12)c3c([H])c([H])c([H])c([H])c3[H]</chem>                                                                                          | 25.12 | Active |
| CHEMBL1982660 | <chem>O=C(N([H])c2c1c([H])c([H])c(OC([H])([H])[H])c([H])c1nc([H])c2[H])N([H])c3nc(c([H])c([H])c3[H])C([F])([F])[F]</chem>                                                                                    | 25.12 | Active |
| CHEMBL1993661 | <chem>O=[S](=O)(N([H])C([H])([H])[H])c1c([H])c([H])c([H])c1N([H])c2nc(nc([H])c2[Cl])N([H])c3c([H])c(OC([H])([H])[H])c(OC([H])([H])[H])c(OC([H])([H])[H])c3[H]</chem>                                         | 25.12 | Active |
| CHEMBL2004631 | <chem>[H]n1nc(N([H])[H])c5c1c([H])c([H])c(c2nnn(c2C3([H])C([H])([H])C3([H])[H])C([H])([H])c4c([H])c([H])c([H])c([H])c4[H])c5[H]</chem>                                                                       | 25.12 | Active |
| CHEMBL1983348 | <chem>N#CC([H])([H])C([H])([H])N(C(=O)c4c([H])c([H])c3nc(c2nn([H])c1c([H])c([H])c([H])c([H])c12)n([H])c3c4[H])C([H])([H])C([H])([H])C([H])([H])C([H])([H])[H]</chem>                                         | 25.12 | Active |
| CHEMBL1971029 | <chem>O=[S](=O)(N([H])C([H])([H])[H])c1c([H])c([H])c([H])c1N([H])c2nc(nc([H])c2[Br])N([H])c4c([H])c(N3C([H])([H])C([H])([H])N(C(=O)C([H])([H])[H])C([H])([H])C3([H])[H])c([H])c([H])c4OC([H])([H])[H]</chem> | 25.12 | Active |
| CHEMBL2000029 | <chem>[H]n1nc(N([H])[H])c5c1c([H])c([H])c(c2nnn(c2c3c(c([H])c([H])c([H])c3[H])C([H])([H])[H])C([H])([H])c4c([H])c([H])c([H])c([H])c4[H])c5[H]</chem>                                                         | 25.12 | Active |
| CHEMBL1982660 | <chem>O=C(N([H])c2c1c([H])c([H])c(OC([H])([H])[H])c([H])c1nc([H])c2[H])N([H])c3nc(c([H])c([H])c3[H])C([F])([F])[F]</chem>                                                                                    | 25.12 | Active |
| CHEMBL1990708 | <chem>O=C(OC([H])([H])C([H])([H])[H])c2c([H])n([H])n1c(=O)c([H])c(nc12)c3c([H])c([H])nc([H])c3[H]</chem>                                                                                                     | 25.12 | Active |
| CHEMBL1682553 | <chem>[H]n1nc([H])c4c1c([H])c([H])c(c3nc2nc([H])c([H])c([H])n2c3N([H])C([H])(C([H])([H])[H])C([H])([H])[H])c4[H]</chem>                                                                                      | 31.62 | Active |
| CHEMBL1969843 | <chem>[H]n1nc([H])c2c1c([H])c([H])c(c2[H])c3nnn(c3[H])C([H])([H])C4([H])C([H])([H])C([H])([H])OC([H])([H])C4([H])[H]</chem>                                                                                  | 31.62 | Active |
| CHEMBL1983534 | <chem>[H]c1c([H])c([H])c(c([H])c1[H])C([H])([H])N([H])c4nc3c([H])c([H])c(c2c([H])c([H])nc([H])c2[H])c([H])c3[s]4</chem>                                                                                      | 31.62 | Active |

|               |                                                                                                                                                                                                    |       |        |
|---------------|----------------------------------------------------------------------------------------------------------------------------------------------------------------------------------------------------|-------|--------|
| CHEMBL1985681 | <chem>N#Cc1c([H])c([H])c4c(c1[H])[C@]([H])(c2nc3c(c([H])c2[H])[C@@]([H])(O[H])C([H])([H])C([H])([H])C3([H])[H])C(=O)N4[H])</chem>                                                                  | 31.62 | Active |
| CHEMBL1997534 | <chem>O=C(N([H])[C@]([H])(c1c([H])c([H])c([H])c(OC([H])([H])[H])c1[H])C([H])([H])[H])c2[s]c(c(c2[H])C([H])([H])[H])c4c([H])c([H])c3n([H])nc(c3c4[H])C([H])([H])[H]</chem>                          | 31.62 | Active |
| CHEMBL1995211 | <chem>[H]n2c1nc([H])nc(N([H])C(C([H])([H])[H])(C([H])([H])[H])C([H])([H])[H])c1c(c2[H])c3c([H])c([H])c([H])c([H])c3[H]</chem>                                                                      | 31.62 | Active |
| CHEMBL1879463 | <chem>O=c1n(c6c(n1c2c([H])c([H])c(c([H])c2[H])C(C#N)(C([H])([H])[H])C([H])([H])[H])c5c([H])c(c4c([H])nc3c([H])c([H])c([H])c([H])c3c4[H])c([H])c([H])c5nc6[H])C([H])([H])[H]</chem>                 | 31.62 | Active |
| CHEMBL592030  | <chem>[H]n1nc([H])c4c1c(c([H])c(c2c([H])n(c3c2nc(nc3[H])N([H])[H])C([H])([H])C([H])([H])C([H])([H])N([H])[H])c4[H])c5[s]c6c(c5[H])c([H])c([H])c([H])c6[H]</chem>                                   | 31.62 | Active |
| CHEMBL1986767 | <chem>O=c2c([H])c(nc1c(c([H])n(n12)C([H])([H])[H])c3c([H])c([H])c([H])c([H])c3[H])c4c([H])c([H])nc([H])c4[H]</chem>                                                                                | 31.62 | Active |
| CHEMBL1994438 | <chem>[Cl]c1nc(nc(c1[H])c3c([H])n([H])c2nc([H])c([H])c([H])c23)N([H])[C@@]4([H])[C@]([H])(N([H])[H])C([H])([H])C([H])([H])C([H])([H])C4([H])[H]</chem>                                             | 31.62 | Active |
| CHEMBL1974617 | <chem>[H]n1nc([H])c3c1c([H])c([H])c(c2onc(c2[H])C([H])([H])O[H])c3[H]</chem>                                                                                                                       | 31.62 | Active |
| CHEMBL1970522 | <chem>O=C2C([S]/C(=N\c1c([H])c([H])c([H])c1[H])N2[H])=C([H])c3c([H])c(OC([H])([H])[H])c(O[H])c([H])c3[H]</chem>                                                                                    | 31.62 | Active |
| CHEMBL1994830 | <chem>[Cl]c4c([H])c([H])c(Oc2c1c([H])c([s]c1c([H])nc2[H])c3nnc(o3)N([H])[H])c([H])c4[H]</chem>                                                                                                     | 31.62 | Active |
| CHEMBL2001288 | <chem>[I]c1nn(c2nc([H])nc(N([H])[H])c12)[C@]3([H])O[C@]([H])(C([H])([H])O[H])[C@]([H])(O[H])[C@@]3([H])O[H]</chem>                                                                                 | 31.62 | Active |
| CHEMBL1971519 | <chem>[H]n1nc(N([H])[H])c2c1c([H])c([H])c([H])c2c3c([H])c([H])c([F])c([H])c3[H]</chem>                                                                                                             | 39.81 | Active |
| CHEMBL2003817 | <chem>O=C(N([H])c1nc([H])c([H])nc1[H])N([H])c3c([H])c([H])nc2c([H])c(c([H])c([H])c23)C([F])([F])[F]</chem>                                                                                         | 39.81 | Active |
| CHEMBL1976936 | <chem>[Cl]c2nc(nc(N([H])[C@@]1([H])C([H])([H])C([H])([H])C([H])([H])[C@@]([H])(O[H])C1([H])[H])c2[H])c4c([H])n([H])c3nc([H])c([H])c([H])c34</chem>                                                 | 39.81 | Active |
| CHEMBL1993648 | <chem>[F]c3c([H])c([H])c([H])c(c2c([H])n([H])c1nc([H])c([H])c([H])c12)c3[H]</chem>                                                                                                                 | 39.81 | Active |
| CHEMBL2000114 | <chem>[H]n1c([H])c([S]C([H])([H])[H])c2c1nc([H])nc2N([H])C([H])([H])C([H])([H])C([H])([H])O[H]</chem>                                                                                              | 39.81 | Active |
| CHEMBL1989136 | <chem>O=C3N([H])c1c([H])c([H])c([H])c([H])c1N([H])c4c([H])c(c2c([H])c([H])nc([H])c2[H])c([H])c([H])c34</chem>                                                                                      | 39.81 | Active |
| CHEMBL1988141 | <chem>O=C(N([H])c2c([H])c([H])c(C(=O)N1C([H])([H])C([H])([H])N([H])C([H])([H])C1([H])[H])c(O[H])c2[H])C([H])([H])C([H])([H])H]</chem>                                                              | 39.81 | Active |
| CHEMBL1982413 | <chem>[Cl]c2c([H])c(c1c(nc([H])c([H])c1[H])c2O[H])C([H])([H])N(C([H])([H])[H])C3([H])C([H])([H])C([H])([H])C([H])([H])C([H])([H])C3([H])[H]</chem>                                                 | 50.12 | Active |
| CHEMBL2002479 | <chem>[Cl]c2c([H])c([H])c1nc(oc1c2[H])N([H])c5c([H])c([H])c(c3c4c(c([H])c(OC([H])([H])C([H])([H])C([H])([H])N([H])[H])c3[H])C(=O)N([H])C4([H])[H])c([H])c5[H]</chem>                               | 50.12 | Active |
| CHEMBL2005886 | <chem>[H]n2c1c([H])c(c([H])c(c1nc2c4c(N([H])C([H])([H])[C@]([H])(O[H])c3c([H])c([H])c([H])c([Cl])c3[H])c([H])c([H])n([H])c4=O)C([H])([H])[H])N5C([H])([H])C([H])([H])OC([H])([H])C5([H])[H]</chem> | 50.12 | Active |

|               |                                                                                                                                                                                               |       |        |
|---------------|-----------------------------------------------------------------------------------------------------------------------------------------------------------------------------------------------|-------|--------|
| CHEMBL243298  | <chem>O=C(O[H])c1c([H])c([H])c([H])c([H])c1N([H])c2nc(nc([H])c2[H])N([H])c3c([H])c([H])c([H])c([F])c3[H]</chem>                                                                               | 50.12 | Active |
| CHEMBL1982610 | <chem>O=c3n([H])c([H])c([I])c2nc(c1c([H])c([H])c([H])c([Cl])c1[H])c([H])n23</chem>                                                                                                            | 50.12 | Active |
| CHEMBL1973808 | <chem>O=C(N([H])c2c([H])c([H])c1n([H])nc([H])c1c2[H])c3c([H])c([H])c([Cl])c([H])c3[H]</chem>                                                                                                  | 50.12 | Active |
| CHEMBL2004515 | <chem>[H]n2c([H])c([H])c1c(nc([H])nc12)c4c([H])c([H])c3OC([H])([H])Oc3c4[H]</chem>                                                                                                            | 50.12 | Active |
| CHEMBL1994693 | <chem>O=C(N([H])c4c([H])c([H])c3c2c([s]c1nc([H])nc(N([H])[H])c12)C([H])([H])C([H])([H])c3c4[H])N([H])c5c([H])c([H])c([H])c([H])c5[H]</chem>                                                   | 50.12 | Active |
| CHEMBL1987745 | <chem>O=C3N([H])c1c([H])c([H])c([H])c([H])c1N([H])c4c([H])c(c2c([H])c([H])nc([H])c2[Cl])c([H])c([H])c34</chem>                                                                                | 63.1  | Active |
| CHEMBL1972988 | <chem>[Cl]c1nc([H])nc(c1[H])c3c([H])n([H])c2nc([H])c([H])c([H])c23</chem>                                                                                                                     | 63.1  | Active |
| CHEMBL1975534 | <chem>[I]c2c([H])n(c1nc([H])nc(c12)N([H])[H])C([H])([H])[C@@]([H])(O[H])[C@@]([H])(O[H])C([H])([H])N([H])[H]</chem>                                                                           | 63.1  | Active |
| CHEMBL1084546 | <chem>O=C4N([H])c3c([H])c([H])c(N([H])c2nc(N([H])C([H])([H])c1c(nc([H])c([H])c1[H])N(C([H])([H])[H])[S](=O)(=O)C([H])([H])[H])c(c([H])n2)C([F])([F])[F])c([H])c3C4([H])[H]</chem>             | 63.1  | Active |
| CHEMBL1997335 | <chem>[H]n2nc(c1c([H])c([H])c(OC([H])([H])[H])c(OC([H])([H])[H])c1[H])c4c([H])c([H])c(OC([H])([H])[H])c3c([H])c([H])c([H])c2c34</chem>                                                        | 63.1  | Active |
| CHEMBL1870106 | <chem>O=C(c2c([H])nc([H])c1nc(n(c12)C([H])([H])C([H])([H])[H])c3nonc3N([H])[H])N4C([H])([H])C([H])([H])[C@]([H])(N([H])[H])C4([H])[H]</chem>                                                  | 63.1  | Active |
| CHEMBL1964937 | <chem>O=C(N([H])[C@]([H])(c1c([H])c([H])c([H])c([H])c1[H])C([H])([H])O[H])N4C([H])([H])C([H])=C(c3c([H])n([H])c2nc([H])c([H])c([H])c23)C([H])([H])C4([H])[H]</chem>                           | 63.1  | Active |
| CHEMBL2006299 | <chem>O=C(N([H])C([H])([H])c1c([H])c([H])c([H])c(OC([H])([H])[H])c1[H])c3c([H])c([H])c(c2c([H])c([H])nc([H])c2[H])c([H])c3[H]</chem>                                                          | 63.1  | Active |
| CHEMBL226403  | <chem>O=C4N([H])C([H])([H])C([H])([H])c5n([H])c(c3c([H])c([H])nc(c2c([H])nc1c([H])c([H])c([H])c([H])c1c2[H])c3[H])c([H])c45</chem>                                                            | 63.1  | Active |
| CHEMBL340921  | <chem>O=C(c2c([H])n(c1c(c([H])c(O[H])c([H])c1[H])C([H])([H])[H])c4c(c2=O)c([H])c([H])c(c3c([H])c([H])nc([H])c3[H])c4[H])N([H])[H]</chem>                                                      | 63.1  | Active |
| CHEMBL1988608 | <chem>O=C(N([H])c1c([H])c([H])c([H])c(c1[H])C([H])([H])N([H])c4c(N([H])c3c([H])c([H])c2n([H])nc([H])c2c3[H])c(=O)c4=O)C([H])([H])[H]</chem>                                                   | 63.1  | Active |
| CHEMBL1966040 | <chem>[F]C([F])([F])c1c([H])c([H])c([H])c(c1[H])C([H])([H])N([H])c2nc([H])nc(c2[H])c4c([H])n([H])c3nc([H])c([H])c([H])c34</chem>                                                              | 63.1  | Active |
| CHEMBL2005216 | <chem>O=[S](=O)(N([H])[C@]4([H])C([H])([H])C([H])([H])[C@]([H])(N([H])c1nc(nc([Cl])c1[H])c3c([H])n([H])c2nc([H])c([H])c([H])c23)C([H])([H])C4([H])[H])C([H])([H])[H]</chem>                   | 63.1  | Active |
| CHEMBL526133  | <chem>O=c4nc(c2c([H])c([H])c1n([H])nc([H])c1c2[H])c([H])c(c3c([H])c([H])c([H])c([H])c3[H])n4[H]</chem>                                                                                        | 63.1  | Active |
| CHEMBL1986530 | <chem>O=C(c1c([H])c(c([H])c([H])c1[F])C([H])([H])c2nn([H])c(=O)c3c2C([H])([H])C([H])([H])C([H])([H])C3([H])[H])N5C([H])([H])C([H])([H])N(c4nc([H])c([H])c([H])n4)C([H])([H])C5([H])[H]</chem> | 63.1  | Active |
| CHEMBL1725279 | <chem>[H]Oc3c1c([H])c([H])c([H])c([H])c1c2N=Nc4c2c3c([H])c([H])c4[H]</chem>                                                                                                                   | 63.1  | Active |



|               |                                                                                                                                                               |       |        |
|---------------|---------------------------------------------------------------------------------------------------------------------------------------------------------------|-------|--------|
| CHEMBL1985367 | [H]C([H])([H])c3c([H])c([H])nc(N([H])c1nc(nc(c1[H])C([H])([H])[H])c2c([H])c([H])c([H])c([H])c2[H])c3[H]                                                       | 63.1  | Active |
| CHEMBL1986756 | O=C(N([H])c2c1c([H])c([H])c(c([H])c1nc([H])c2[H])C([H])([H])C([H])([H])[H])N([H])c3nc(c([H])c([H])c3[H])C([F])([F])[F]                                        | 63.1  | Active |
| CHEMBL2006778 | O=C(N([H])C([H])([H])[H])C([H])=C([H])c4c([H])nc(N([H])[H])c3c(c2c([H])c([F])c1n([H])c(c([H])c1c2[H])C([H])([H])[H])c([H])s)c34                               | 63.1  | Active |
| CHEMBL1981511 | O=C4c2c([H])c([H])c(c1c([H])c(nc([H])c1[H])C([H])([H])[H])c([H])c2N([H])c3c([H])c([H])c([H])c([H])c3N4[H]                                                     | 63.1  | Active |
| CHEMBL2007296 | O=C(N([H])[C@]([H])(c1c([H])c([H])c([H])cOC([H])([H])C([H])([H])C([H])([H])[H])c1[H])C([H])([H])[H])c3c([H])c([H])c(c2c([H])c([H])nc([H])c2[H])c([H])c3[H]    | 63.1  | Active |
| CHEMBL1682545 | [H]n1nc([H])c4c1c([H])c([H])c(c2nc([s]c2[H])N([H])c3c([H])c([H])c([H])c([H])c3[H])c4[H]                                                                       | 79.43 | Active |
| CHEMBL1990482 | O=C(N([H])[H])c2c([H])c([H])c([H])c1n([H])c(nc12)c3c([H])c([H])nc([H])c3[H]                                                                                   | 79.43 | Active |
| CHEMBL482967  | [H]C([H])([H])c1nc([s]c1c2nc(nc([H])c2[H])N([H])c4c([H])c([H])c(N3C([H])([H])C([H])([H])OC([H])([H])C3([H])[H])c([H])c4[H])N([H])[H]                          | 79.43 | Active |
| CHEMBL1984363 | O=C(N([H])c1c([H])c(c([F])c([H])c1[H])C([H])([H])[H])C([H])([H])c4c([H])c([H])c(c3c([H])c([H])c([H])c2n([H])nc(N([H])[H])c23)c([H])c4[H]                      | 79.43 | Active |
| CHEMBL2003341 | O=C(N([H])[C@@]([H])(c1c([H])c([Cl])c([H])c([Cl])c1[H])C([H])([H])O[H])c3c([H])c([H])c(c2c([H])c([H])nc([H])c2[H])c([H])c3[H]                                 | 79.43 | Active |
| CHEMBL1972355 | [H]n1c(nc2c([H])c([H])c([H])c([H])c12)c4c(OC([H])([H])[H])c3c(oc(c([H])c3=O)C([H])([H])[H])c([H])c4O[H]                                                       | 79.43 | Active |
| CHEMBL220057  | O=C(N([H])c1c([H])c([H])c([H])c(c1[H])C([H])([H])[H])N([H])c4c([H])c([H])c(c3c([H])c([H])c([H])c2n([H])nc(N([H])[H])c23)c([H])c4[H]                           | 79.43 | Active |
| CHEMBL1992634 | [Br]c3c([H])nc2n([H])c([H])c(c1c([H])c([H])c([H])c([H])c1[H])c2c3[H]                                                                                          | 79.43 | Active |
| CHEMBL1970104 | [H]n3nc(c2nc1c([H])c([H])c(c([H])c1n2[H])C(C([H])([H])[H])C([H])([H])[H])C([H])([H])[H])c4c3c([H])c([H])c([H])c4[H]                                           | 79.43 | Active |
| CHEMBL1992536 | [H]n1nc([H])c4c1c([H])c([H])c(N([H])c3c(N([H])C([H])([H])c2c([H])c([H])c(OC([H])([H])[H])c([H])c2[H])c(=O)c3=O)c4[H]                                          | 79.43 | Active |
| CHEMBL1983945 | [H]n1c([H])c(c2c1c([H])c([H])c([H])c2[H])C([H])([H])[C@@]([H])(N([H])[H])C(=O)N([H])c4c([H])nc([H])c(C([H])=C([H])c3c([H])c([H])nc([H])c3[H])c4[H]            | 79.43 | Active |
| CHEMBL243518  | O=C(O[H])c3c(N([H])c1nc(nc([H])c1[H])N([H])c2c([H])c([H])c(c([F])c2[H])C([H])([H])[H])c([H])c([H])c([H])c3[H]                                                 | 79.43 | Active |
| CHEMBL1998611 | O=C(N([H])[H])c2[s]c1c([Br])c([H])c([H])c([Cl])c1c2N([H])[H]                                                                                                  | 79.43 | Active |
| CHEMBL1970104 | [H]n3nc(c2nc1c([H])c([H])c(c([H])c1n2[H])C(C([H])([H])[H])C([H])([H])[H])C([H])([H])[H])c4c3c([H])c([H])c([H])c4[H]                                           | 79.43 | Active |
| CHEMBL1974328 | O=C(c1nc([H])c(nc1N([H])c2c([H])c([H])c([H])c(c2[H])C([H])([H])[H])N([H])[C@@]3([H])C([H])([H])C([H])([H])C([H])([H])C([H])([H])[C@]3([H])N([H])[H])N([H])[H] | 79.43 | Active |
| CHEMBL1997041 | [H]n3c2nc([H])nc(c1c([H])c(c([F])c([H])c1[H])C([H])([H])[H])c2c([H])c3[H]                                                                                     | 79.43 | Active |

|               |                                                                                                                                                                                                 |       |        |
|---------------|-------------------------------------------------------------------------------------------------------------------------------------------------------------------------------------------------|-------|--------|
| CHEMBL1965631 | <chem>O=C(N([H])c4nn([H])c3c([H])c([H])c(c1nnn(c1[H])C([H])([H])c2c([H])c([H])c([H])c([H])c2[H])c([H])c34)C([H])([H])N(C([H])([H])C([H])([H])H)</chem>                                          | 79.43 | Active |
| CHEMBL1968868 | <chem>N#Cc1nc(c([H])c([H])c1[H])N([H])C(=O)N([H])c3c([H])c([H])nc2c([H])c(c([H])c([H])c23)C([F])([F])[F]</chem>                                                                                 | 79.43 | Active |
| CHEMBL1973142 | <chem>O=C(N([H])c2c([s]c1c([H])c([H])c([Cl])c([Cl])c12)C(=O)N([H])H)C([H])([H])H</chem>                                                                                                         | 79.43 | Active |
| CHEMBL223360  | <chem>[F]c1c([H])c([H])c(c([H])c1N([H])C(=O)N([H])c4c([H])c([H])c(c3c([H])c([H])c([H])c2n([H])nc(N([H])H)c23)c([H])c4[H])C([H])([H])H</chem>                                                    | 79.43 | Active |
| CHEMBL1976134 | <chem>[H]n4nc([H])c3c([H])c([H])c(c2c([H])c1c([H])c([H])n([H])c1nc2[H])c([H])c34</chem>                                                                                                         | 79.43 | Active |
| CHEMBL2001641 | <chem>[H]n1nc([H])c3c1c([H])c([H])c(n2nnc(c2[H])C(O[H])(C([H])([H])H)C([H])([H])H)c3[H]</chem>                                                                                                  | 79.43 | Active |
| CHEMBL1965845 | <chem>O=C(N([H])C@([H])(c1c([H])c([H])c([H])c(OC([H])([H])H)c1[H])C([H])([H])H)N4C([H])([H])C([H])=C(c3c([H])n([H])c2nc([H])c([H])c([H])c23)C([H])([H])C4([H])H</chem>                          | 79.43 | Active |
| CHEMBL2007375 | <chem>O=C(N([H])c2c([H])c([H])nc1c([H])c([H])c(C#CC([H])([H])H)c([H])c12)N([H])c3nc(c([H])c([H])c3[H])C([F])([F])[F]</chem>                                                                     | 79.43 | Active |
| CHEMBL1988662 | <chem>[H]n3nc(N([H])H)c2c(OC([H])([H])C([H])([H])C([H])([H])N(C([H])([H])H)C([H])([H])H)c([H])c(c1c([H])c([H])nc([H])c1[H])c23</chem>                                                           | 79.43 | Active |
| CHEMBL1996702 | <chem>O=C(c4c([H])c([H])c3N([H])c2c(c([H])c([H])c(c1c([H])c(OC([H])([H])H)c(O[H])c([H])c1[H])c2[H])C(=O)N([H])c3c4[H])N([H])C([H])([H])C([H])([H])C([H])([H])N(C([H])([H])H)C([H])([H])H</chem> | 79.43 | Active |
| CHEMBL2005528 | <chem>O=C(OC([H])([H])C([H])([H])H)c2c([H])c([H])c1n([H])c3c(c1c2[H])C([H])([H])C([H])([H])N([H])C3=O</chem>                                                                                    | 79.43 | Active |
| CHEMBL21156   | <chem>[F]c3c([H])c([H])c2c1nc(n([H])c1c4c(c2c3[H])c(=O)n([H])c([H])c4[H])C(C([H])([H])H)(C([H])([H])H)C([H])([H])H</chem>                                                                       | 79.43 | Active |
| CHEMBL583144  | <chem>O=c1n([H])c([H])nc2c1[s]c3c([Cl])c([H])c([H])c([Cl])c23</chem>                                                                                                                            | 89.6  | Active |
| CHEMBL2002599 | <chem>O=C(N([H])c1nc([H])c([H])nc1[H])N([H])c5c([H])c([H])nc4c([H])c([H])cN3C([H])([H])[C@@]2([H])C([H])([H])OC([H])([H])[C@@]2([H])C3([H])H)c([H])c45</chem>                                   | 100   | Active |
| CHEMBL1964444 | <chem>O=C(N([H])c2c([H])c([H])nc1c([H])c([H])c(c([H])c12)C([H])([H])H)N([H])c3nc(c([H])c([H])c3[H])C([F])([F])[F]</chem>                                                                        | 100   | Active |
| CHEMBL244378  | <chem>O=C(O[H])c1c([H])c([H])c([H])c([H])c1N([H])c2nc(nc([H])c2[H])N([H])c4c([H])c([H])c3c([H])nn([H])c3c4[H]</chem>                                                                            | 100   | Active |
| CHEMBL2003286 | <chem>O=C2[S]/C(=C/[H])c1c([H])c(OC([H])([H])H)c(O[H])c([H])c1[H])C(=O)N2[H]</chem>                                                                                                             | 100   | Active |
| CHEMBL1982982 | <chem>O=C(N([H])H)c2c([H])c([H])c(c1c([H])c([H])nc([H])c1[H])c([H])c2N([H])C([H])([H])c3c([H])c([H])c([H])c([F])c3[H]</chem>                                                                    | 100   | Active |
| CHEMBL1164265 | <chem>[F]c1c(c([Cl])c([F])c([H])c1[H])C([H])([H])N5c4c(nc([H])c(c2c([H])c([H])c(nc2[H])N3C([H])([H])C([H])([H])N(C([H])([H])H)C([H])([H])C3([H])H)c4[H])N([H])C([H])([H])C5([H])H</chem>        | 100   | Active |
| CHEMBL1993424 | <chem>O=[S](=O)N([H])H)c4c([H])c([H])c([H])c(N([H])c2nc([H])c1c([H])c([H])n(c1n2)C([H])([H])c3c([H])c([H])c([H])c([H])c3[H])c4[H]</chem>                                                        | 100   | Active |
| CHEMBL1964692 | <chem>O=C(N([H])c3c([H])c([H])c(c2c1c(nn(c1c([H])nc2[H])C([H])([H])H)N([H])H)c([H])c3[H])N([H])c4c([H])c([H])c([H])c(c4[H])C([F])([F])[F]</chem>                                                | 100   | Active |

|               |                                                                                                                                                                                                                    |        |        |
|---------------|--------------------------------------------------------------------------------------------------------------------------------------------------------------------------------------------------------------------|--------|--------|
| CHEMBL583144  | O=c1n([H])c([H])nc2c1[s]c3c([Cl])c([H])c([H])c([Cl])c23                                                                                                                                                            | 100    | Active |
| CHEMBL1967544 | O=[S](=O)(c2c1c([H])c([H])c([H])c(NC([H])([H])[H])C([H])([H])[H])c1c([H])c([H])c2[H])N(c5c([H])nc([H])c(c4c([H])c([H])c3c([H])nc([H])c([H])c3c4[H])c5[H])C([H])([H])C([H])([H])N([H])[H]                           | 100    | Active |
| CHEMBL2007603 | O=C(N([H])c1nc(c([H])c([H])c1[H])C([F])([F])[F])N([H])c3c([H])c([H])nc2c([H])c([H])c([F])c([H])c23                                                                                                                 | 100    | Active |
| CHEMBL1965131 | O=C(c1c([H])c([H])c(c([H])c1[H])C([H])([H])[H])N([H])c3c([s]c2c([H])c([H])c([Cl])c([Cl])c23)C(=O)N([H])[H]                                                                                                         | 100    | Active |
| CHEMBL1965169 | [Br]c3nc2c([H])c(c1c([H])c([H])c(c([H])c1[H])C([H])([H])[H])n([H])c2nc3[H]                                                                                                                                         | 100    | Active |
| CHEMBL1971606 | O=C(N([H])[C@]([H])(c1c([H])c([H])c([H])c(OC([H])([H])C([H])([H])C([H])([H])[H])c1[H])C([H])([H])[H])c3c([H])c([H])c(c2c([H])c([H])nc([H])c2[F])c([H])c3[H]                                                        | 100    | Active |
| CHEMBL1967878 | [F]c1c([H])nc(nc1N([H])[C@]3([H])[C@]2([H])C([H])=C([H])[C@@]([H])(C2([H])[H])[C@]3([H])C(=O)N([H])[H])N([H])c4c([H])c(c(c([H])c4[H])N5C([H])([H])C([H])([H])N(C([H])([H])[H])C([H])([H])C5([H])[H])C([H])([H])[H] | 100    | Active |
| CHEMBL522892  | [F]c5c4c(c(c3nc2c([H])c([H])c(N1C([H])([H])C([H])([H])N(C([H])([H])[H])C([H])([H])C1([H])[H])c([H])c2n3[H])c(=O)n([H])c4c([H])c([H])c5[H])N([H])[H]                                                                | 100    | Active |
| CHEMBL2003271 | O=C(N([H])[H])c2[s]c1c([H])c([H])c([Cl])c([Cl])c1c2N([H])C(=O)c3c([H])c([H])c([Cl])c([H])c3[H]                                                                                                                     | 100    | Active |
| CHEMBL497151  | O=c4nc(c1[s]c3c(c1[H])c(Oc2c([H])c([H])c([I])c([H])c2[H])c([H])nc3[H])n([H])o4                                                                                                                                     | 125.89 | Active |
| CHEMBL1982992 | [Cl]c3c([H])[s]c2nc([H])nc(N([H])c1c([H])c([H])c([H])c(O[H])c1[H])c23                                                                                                                                              | 125.89 | Active |
| CHEMBL1989471 | [H]n2c1nc([H])c([H])c(c1c(=O)c3c2c([H])c(c([H])c3[H])C([H])(C([H])([H])[H])C([H])([H])[H])C([H])([H])[H]                                                                                                           | 125.89 | Active |
| CHEMBL1977681 | O=C(N([H])C([H])([H])[H])c1[s]c2c(c1[H])c(nn2[H])c3c([H])c([H])c([H])c([H])c3[F]                                                                                                                                   | 125.89 | Active |
| CHEMBL1988537 | O=C(c1c([H])c([H])c(OC([H])([H])[H])c([H])c1[H])N3c2c([H])c([H])c([H])c([H])c2[S]c4c([Cl])c([H])nc([H])c34                                                                                                         | 125.89 | Active |
| CHEMBL1990254 | O=C(N([H])[C@@]([H])(c1c([H])c([H])c([H])c([H])c1[H])C([H])([H])N([H])[H])c3c([H])c([H])c(c2c([H])c([H])nc([H])c2[H])c([H])c3[H]                                                                                   | 125.89 | Active |
| CHEMBL1971943 | [H]n1c([H])c(c2c1nc([H])c([H])c2Oc4c([F])c([H])c(N([H])c3nc(nc([Cl])c3[H])N([H])[H])c([H])c4[F])C([H])([H])[H]                                                                                                     | 125.89 | Active |
| CHEMBL1990254 | O=C(N([H])[C@@]([H])(c1c([H])c([H])c([H])c([H])c1[H])C([H])([H])N([H])[H])c3c([H])c([H])c(c2c([H])c([H])nc([H])c2[H])c([H])c3[H]                                                                                   | 125.89 | Active |
| CHEMBL360847  | O=C6C3=C(c1c([H])n(c2c1c([H])c([H])c([H])c2[H])C([H])([H])C([H])([H])[C@@]([H])(OC([H])([H])C([H])([H])n4c([H])c3c5c4c([H])c([H])c([H])c5[H])C([H])([H])N(C([H])([H])[H])C([H])([H])[H])C(=O)N6[H]                 | 125.89 | Active |
| CHEMBL196363  | O=C(N([H])c1c([H])c([H])c([H])c(c1[H])C([H])([H])[H])N([H])c4c([H])c([H])c(c3c([H])[s]c2nc([H])nc(N([H])[H])c23)c([H])c4[H]                                                                                        | 125.89 | Active |
| CHEMBL475251  | [F]c1c([H])nc(nc1N([H])c3nc2c(OC(C(=O)N2[H])(C([H])([H])[H])C([H])([H])[H])c([H])c3[H])N([H])c4c([H])c(OC([H])([H])[H])c(OC([H])([H])[H])c(OC([H])([H])[H])c4[H]                                                   | 125.89 | Active |
| CHEMBL1994241 | N#C/C(=C/[H])c1c([H])c(OC([H])([H])[H])c(O[H])c([H])c1[Br]c3nc2c([H])c([H])c([H])c([H])c2n3[H]                                                                                                                     | 125.89 | Active |

|               |                                                                                                                                                      |        |        |
|---------------|------------------------------------------------------------------------------------------------------------------------------------------------------|--------|--------|
| CHEMBL2000345 | N#C/C(=C(\[H])c1c([H])c(OC([H])([H])[H])c(O[H])c([H])c1[Br])c3nc2c([H])c(c([H])c([H])c2n3[H])C([H])([H])[H]                                          | 125.89 | Active |
| CHEMBL1992371 | O=C(N([H])c1nc([H])c([H])nc1[H])N([H])c3c([H])c([H])c([H])c2c(O[H])c([H])c([H])c([H])c23                                                             | 125.89 | Active |
| CHEMBL1986666 | O=C(O[H])c1c([H])c([H])c([H])c([H])c1N([H])c2nc([H])nc(n2)N([H])c4c([H])c([H])c3c([H])nn([H])c3c4[H]                                                 | 125.89 | Active |
| CHEMBL1975900 | O=c3c(N([H])C([H])([H])c1c([H])c([H])c([Cl])c([Cl])c1[H])c(N([H])c2c([H])c([H])nc([H])c2[H])c3=O                                                     | 125.89 | Active |
| CHEMBL2002099 | N#CC([H])([H])[C@@]([H])(n1nc([H])c(c1[H])c3nc([H])nc2n([H])c([H])c([H])c23)[C@@]4([H])C([H])([H])C([H])([H])C([H])([H])C4([H])[H]                   | 125.89 | Active |
| CHEMBL242865  | O=C(O[H])c1c([H])c([H])c([H])c([H])c1N([H])c2nc(nc([H])c2[H])N([H])c3c([H])c([H])c([N+](=O)[O-])c([H])c3[H]                                          | 125.89 | Active |
| CHEMBL1242373 | O=C(N([H])c1c([H])c([H])c([H])c(c1[H])C([H])([H])[H])N([H])c2c([H])c([H])c4c(c2[H])C([H])([H])C([H])([H])c5[s]c3nc([H])nc(N([H])[H])c3c45            | 125.89 | Active |
| CHEMBL1981215 | O=C(N([H])c1nc(c([H])c([H])c1[H])C([F])([F])[F])N([H])c3c([H])c([H])nc2c([H])c(OC([F])([F])[H])c([H])c([H])c23                                       | 125.89 | Active |
| CHEMBL2004156 | O=c4c([H])c(c1c([H])c([H])c([H])c([F])c1[H])n([H])c3c(c2c([H])c([H])c([F])c([H])c2[H])c([H])nn34                                                     | 158.49 | Active |
| CHEMBL2002992 | O=C(N([H])c2c([H])c([H])nc1n([H])c([H])c([H])c12)[C@@]3([H])C([H])([H])C([H])([H])[C@]([H])([C@@]([H])N([H])[H])C([H])([H])[H])C([H])([H])C3([H])[H] | 158.49 | Active |
| CHEMBL1997846 | [Cl]c1nc(nc(c1[H])N([H])C2([H])C([H])([H])C([H])([H])C([H])([H])C([H])([H])C2([H])[H])c4c([H])n([H])c3nc([H])c([H])c([H])c34                         | 158.49 | Active |
| CHEMBL1516890 | O=C4/C(=C(\[H])c1c([H])n(c2c1c([H])c([H])c([H])c2[H])C([H])([H])[H])c3nc([H])c([H])c([H])c3N4[H]                                                     | 158.49 | Active |
| CHEMBL1993335 | [Br]c4nc3c([H])c(c1c([H])n(c2c1c([H])c([F])c([H])c2[H])C([H])([H])[H])n([H])c3nc4[H]                                                                 | 158.49 | Active |
| CHEMBL1973893 | O=[S](=O)(N([H])c3c([H])c([H])c(c2c([H])c([H])c1n([H])nc(N([H])C(=O)C([H])([H])[H])c1c2[H])c([H])c3[H])C([H])([H])C([H])([H])C([H])([H])[H]          | 158.49 | Active |
| CHEMBL1967513 | O=C(N([H])c1nc(c([H])c([H])c1[H])C([F])([F])[F])N([H])c3c([H])c([H])nc2c([H])c([H])c([Cl])c([H])c23                                                  | 158.49 | Active |
| CHEMBL1979970 | O=C(N([H])c3nn([H])c2nnc(c1c([H])c([H])c([H])c([F])c1[F])c([H])c23)C([H])([H])C([H])([H])C([H])([H])[H]                                              | 158.49 | Active |
| CHEMBL1975927 | [H]C([H])([H])Oc4c([H])c([H])c(n1c([H])c([H])c2c([H])nc(nc12)N([H])c3c([H])c(OC([H])([H])[H])c(OC([H])([H])[H])c(OC([H])([H])[H])c3[H])c([H])c4[H]   | 158.49 | Active |
| CHEMBL1998545 | O=C(N([H])[C@]([H])(C([H])([H])O[H])C([H])([H])c1c([H])c([H])c([H])c([H])c1[H])c3c([H])c([H])c(c2c([H])c([H])nc([H])c2[H])c([H])c3[H]                | 158.49 | Active |
| CHEMBL1989518 | [H]N([H])C([H])([H])C([H])([H])Oc2c([H])nc([H])c(C([H])=C([H])c1c([H])c([H])nc([H])c1[H])c2[H]                                                       | 158.49 | Active |
| CHEMBL1973483 | O=C(N([H])c1nc(c([H])c([H])c1[H])C([F])([F])[F])N([H])c3c([H])c([H])nc2c([H])c(c([H])c([H])c23)C([F])([F])[F]                                        | 158.49 | Active |
| CHEMBL1987430 | O=C(N([H])c2c([H])c([H])nc1c([H])c([H])c(c([H])c12)C([H])([H])C([H])([H])C([H])([H])[H])N([H])c3nc(c([H])c([H])c3[H])C([F])([F])[F]                  | 158.49 | Active |

|               |                                                                                                                                                                                                                                                       |        |        |
|---------------|-------------------------------------------------------------------------------------------------------------------------------------------------------------------------------------------------------------------------------------------------------|--------|--------|
| CHEMBL1978195 | <chem>O=C(N([H])[H])c1[s]c3c(c1[H])c(c2c([H])c([H])c([Br])c([H])c2[H])c([H])nc3[H]</chem>                                                                                                                                                             | 158.49 | Active |
| CHEMBL2007559 | <chem>O=C(N([H])C([H])([H])C([H])([H])C([H])([H])[H])c3c([H])c([H])c(N([H])c2nc(N([H])C([H])([H])C([F])([F])[F])c1[s]c([H])c([H])c1n2)c([H])c3[H]</chem>                                                                                              | 158.49 | Active |
| CHEMBL2006237 | <chem>O=C(c4c3nc(c2nc(N([H])C([H])([H])C([H])([H])C([H])([H])N1C([H])([H])C([H])([H])N(C([H])([H])[H])C([H])([H])C1([H])[H])c([H])c([H])c2[H])n([H])c3c([H])c([H])c4[H])N([H])[H]</chem>                                                              | 158.49 | Active |
| CHEMBL2004443 | <chem>O=c4c([H])c(c1c([H])c([H])c([F])c([H])c1[H])n([H])c3c(c2c([H])c([H])c([F])c([H])c2[H])c([H])nn34</chem>                                                                                                                                         | 158.49 | Active |
| CHEMBL2000894 | <chem>O=C(c2c([H])n(c1c(c([H])c(O[H])c([H])c1[H])C([H])([H])[H])c4c(c2=O)c([H])c([H])c(c3c([H])c([H])nc([H])c3[H])c4[H])N([H])N([H])[H]</chem>                                                                                                        | 158.49 | Active |
| CHEMBL1974310 | <chem>O=C(N([H])[H])c1[s]c3c(c1[H])c(c2c([H])c([H])c([F])c([H])c2[H])c([H])nc3[H]</chem>                                                                                                                                                              | 158.49 | Active |
| CHEMBL1972489 | <chem>O=C(N([H])c2c([H])c([H])c1c([H])nn([H])c1c2[H])c3c([H])c([H])c([Cl])c([H])c3[H]</chem>                                                                                                                                                          | 158.49 | Active |
| CHEMBL1983268 | <chem>O=C(c2c([H])c([H])c(N1C([H])([H])C([H])([H])N(C([H])([H])[H])C([H])([H])C1([H])[H])c([H])c2N([H])C3([H])C([H])([H])C([H])([H])OC([H])([H])C3([H])[H])N([H])c5nn([H])c4c([H])c([H])c(c([H])c45)C([H])([H])c6c([H])c([F])c([H])c([F])c6[H]</chem> | 199.53 | Active |
| CHEMBL116070  | <chem>O=C(N([H])[H])c1[s]c3c(c1[H])c(Oc2c([H])c([H])c([Br])c([H])c2[H])c([H])nc3[H]</chem>                                                                                                                                                            | 199.53 | Active |
| CHEMBL1980671 | <chem>O=C2c1c(nc([H])nc1N([H])c3c(N2[H])c([H])c([H])c([H])c3[H])N([H])[H]</chem>                                                                                                                                                                      | 199.53 | Active |
| CHEMBL1982135 | <chem>O=C(N([H])c1c(c([H])c([H])c([H])c1[H])C([H])([H])[H])N([H])c2c([H])c([H])c4c(c2[H])C([H])([H])C([H])([H])c5[s]c3nc([H])nc(N([H])[H])c3c45</chem>                                                                                                | 199.53 | Active |
| CHEMBL1461728 | <chem>O=C(N([H])c2c([H])c([H])c1n([H])nc([H])c1c2[H])c3c([H])c([H])c([H])c([F])c3[H]</chem>                                                                                                                                                           | 199.53 | Active |
| CHEMBL1982924 | <chem>O=C(c1c([H])c([H])c([H])c(OC([H])([H])[H])c1[H])N([H])c4c([H])nc3n([H])c([H])c(c2c([H])c([H])c([H])c([H])c2[H])c3c4[H]</chem>                                                                                                                   | 199.53 | Active |
| CHEMBL1997764 | <chem>O=C(c1c([H])c([H])c(OC([H])([H])[H])c([H])c1[H])N([H])c4c([H])nc3n([H])c([H])c(c2c([H])c([H])c([H])c([H])c2[H])c3c4[H]</chem>                                                                                                                   | 199.53 | Active |
| CHEMBL191003  | <chem>O=[S](=O)(c3c([H])c([H])c(N([H])c1nc(N([H])[H])n(n1)C(=O)c2c([F])c([H])c([H])c([H])c2[F])c([H])c3[H])N([H])[H]</chem>                                                                                                                           | 199.53 | Active |
| CHEMBL1974664 | <chem>[H]n2c1c(nc([H])nc1c3c2c([H])c([H])c([H])c3[H])N([H])N=C([H])c4c([H])c([H])c(OC([H])([H])[H])c(OC([H])([H])[H])c4[H]</chem>                                                                                                                     | 199.53 | Active |
| CHEMBL411903  | <chem>O=C(N([H])c3c([H])c([H])c(/C2=N/c1c(nc([H])nc1N([H])C([H])([H])C2([H])[H])N([H])[H])c([H])c3[H])N([H])c4c([H])c(c([H])c([H])c4[F])C([F])([F])[F]</chem>                                                                                         | 199.53 | Active |
| CHEMBL443962  | <chem>[Br]c3c2nc([H])c(c1c([H])c([H])c(OC([H])([H])[H])c([H])c1[H])c([H])n2nc3[H]</chem>                                                                                                                                                              | 199.53 | Active |
| CHEMBL1986603 | <chem>O=C(N([H])c1noc(c1[H])C([H])([H])[H])C([H])([H])C([H])([H])N([H])C(=O)N([H])c2nc(c([s]2)c4c([H])c([H])c(n3nc([H])c([H])c3[H])c([H])c4[H])C([H])([H])[H]</chem>                                                                                  | 199.53 | Active |
| CHEMBL2005478 | <chem>[Br]c4nc3c([H])c(c2c1c(c([H])c([H])c(OC([H])([H])[H])c1[H])n(c2[H])C([H])([H])[H])n([H])c3nc4[H]</chem>                                                                                                                                         | 199.53 | Active |
| CHEMBL1981782 | <chem>O=C(N([H])C([H])([H])c1c([H])c([H])c([Cl])c([Cl])c1[H])N([H])c3c([H])c([H])c2n([H])nc([H])c2c3[H]</chem>                                                                                                                                        | 199.53 | Active |

|               |                                                                                                                                                                                                                                  |        |        |
|---------------|----------------------------------------------------------------------------------------------------------------------------------------------------------------------------------------------------------------------------------|--------|--------|
| CHEMBL1988805 | <chem>N#Cc3c([H])c([H])c2nc(N([H])[H])n(c1nc([H])c([H])[s]1)c2c3[H]</chem>                                                                                                                                                       | 199.53 | Active |
| CHEMBL1968406 | <chem>O=C(N([H])c1c([H])c([H])c([H])c(c1[H])C([H])([H])C([H])([H])[H])N([H])c2c([H])c([H])c4c(c2[H])C([H])([H])C([H])([H])c5[s]c3nc([H])nc(N([H])[H])c3c45</chem>                                                                | 199.53 | Active |
| CHEMBL1972454 | <chem>O=C(n1nc([H])c2c([H])c(N([H])[H])c([H])c([H])c12)C([H])([H])[H]</chem>                                                                                                                                                     | 199.53 | Active |
| CHEMBL41783   | <chem>O=C(N([H])c3nn([H])c2nnc(c1c([H])c([H])c([H])c([F])c1[F])c([H])c23)C([H])([H])C([H])([H])C([H])([H])N(C([H])([H])[H])C([H])([H])[H]</chem>                                                                                 | 199.53 | Active |
| CHEMBL1976220 | <chem>O=C(N([H])c3c([H])c([H])c(c2c([H])[s]c1c([H])c([H])nc(N([H])[H])c12)c([H])c3[H])N([H])c4c([H])c([H])c([H])c([Br])c4[H]</chem>                                                                                              | 199.53 | Active |
| CHEMBL508928  | <chem>O=C(N([H])c1c([H])c([H])c([H])c(c1[H])C([H])([H])[H])N([H])c5c([H])c([H])c(c4c([H])nc3c(c2c([H])nn(c2[H])C([H])([H])[H])c([H])nn3c4N([H])[H])c([H])c5[H]</chem>                                                            | 199.53 | Active |
| CHEMBL2004872 | <chem>O=C(N([H])[C@@]([H])c1c([H])c([H])c([H])c(OC([H])([H])[H])c1[H])C([H])([H])[H])c3c([H])c([H])c(c2nc([H])nc([H])c2[H])c([H])c3[H]</chem>                                                                                    | 199.53 | Active |
| CHEMBL1983111 | <chem>O=C(N([H])C([H])([H])C(=O)N4[C@@]5([H])c3c(c([H])c(N([H])c1nc([H])c(c(n1)N([H])[C@@]2([H])C([H])([H])C([H])([H])C2([H])[H])C([F])([F])[F])c([H])c3[H])[C@@]4([H])C([H])([H])C5([H])[H])C([H])([H])[H]</chem>               | 199.53 | Active |
| CHEMBL1969372 | <chem>[F]c4c([H])c([H])c(c2nc1c([H])nc([H])c([H])n1c2c3nc(nc([H])c3[H])N([H])C([H])([H])C([H])([H])OC([H])([H])[H])c([H])c4[H]</chem>                                                                                            | 199.53 | Active |
| CHEMBL1969301 | <chem>O=C(N([H])c3nc2c([H])c(N(C(=O)C1([H])C([H])([H])C([H])([H])C([H])([H])C([H])([H])C1([H])[H])C([H])([H])[H])c([H])c([H])c2n3C([H])([H])C([H])([H])C([H])([H])C([H])([H])C([H])([H])c4c([H])c([H])c([H])c(C#N)c4[H]</chem>   | 199.53 | Active |
| CHEMBL2004892 | <chem>O=[S](=O)(N([H])c3c([H])c([H])c(c2c([H])c([H])c1n([H])nc(N([H])[H])c1c2[H])c([H])c3[H])C([H])([H])[H]</chem>                                                                                                               | 199.53 | Active |
| CHEMBL1994555 | <chem>O=C(c3c([H])c([H])c(c2c(c1nc([H])c([H])nc1n2[H])C([H])([H])C([H])([H])[H])c([H])c3[H])C([H])([H])[H]</chem>                                                                                                                | 251.19 | Active |
| CHEMBL2000393 | <chem>O=c2n([H])c1c([H])nc(nc1n2[C@]3([H])c4c(OC([H])([H])C3([H])[H])c([F])c([H])c([H])c4[H])n5c([H])nc6c([H])c([H])c([F])c([H])c56</chem>                                                                                       | 251.19 | Active |
| CHEMBL1682546 | <chem>[H]n1nc([H])c4c1c([H])c([H])c(c2nc([s]c2[H])N([H])C([H])([H])c3c([H])c([H])c([H])c([H])c3[H])c4[H]</chem>                                                                                                                  | 251.19 | Active |
| CHEMBL1997611 | <chem>O=C(OC([H])([H])C([H])([H])[H])c3nc2c(=O)n([H])c1c([H])c([N+](=O)[O-])c(N([H])C(=O)C([H])([H])[H])c([H])c1n2c3C([H])([H])[H]</chem>                                                                                        | 251.19 | Active |
| CHEMBL1979252 | <chem>O=c3c(N([H])C([H])([H])c1c([H])c([H])c([H])c(c1[H])C([F])([F])[F])c(N([H])c2c([H])c([H])nc([H])c2[H])c3=O</chem>                                                                                                           | 251.19 | Active |
| CHEMBL2002649 | <chem>[H]n1c([H])c(nc1[H])C([H])=C3c2c(c([H])c([H])c(OC([H])([H])[H])c2[H])N([H])C3=O</chem>                                                                                                                                     | 251.19 | Active |
| CHEMBL1966842 | <chem>O=C(N([H])c5c([H])c([H])c([H])c(c2nc1[s]c([H])c([H])n1c2c3nc(nc([H])c3[H])N([H])c4c(OC([H])([H])[H])c([H])c([H])c(c4[H])C([H])([H])N(C([H])([H])[H])C([H])([H])[H])c5[H])C([H])([H])c6c([H])c([H])c([H])c([H])c6[H]</chem> | 251.19 | Active |
| CHEMBL1975121 | <chem>O=C(N([H])[C@]([H])c1c([H])c([H])c([H])c(OC([H])([H])[H])c1[H])C([H])([H])[H])c3c([H])c([H])c(c2c([H])c([H])nc([H])c2[H])c([H])c3[H]</chem>                                                                                | 251.19 | Active |
| CHEMBL1992581 | <chem>O=C(N([H])c1c([H])c([H])c([S]C([F])([F])[H])c([H])c1[H])C([H])([H])c3c([H])c([H])c(c2c([H])c([H])c([H])nc2[H])c([H])c3[H]</chem>                                                                                           | 251.19 | Active |
| CHEMBL1975647 | <chem>O=C(N([H])c1nc([H])c([H])nc1[H])N([H])c3c([H])c([H])nc2c([F])c([H])c([H])c([H])c23</chem>                                                                                                                                  | 251.19 | Active |

|               |                                                                                                                                                                                                                        |        |        |
|---------------|------------------------------------------------------------------------------------------------------------------------------------------------------------------------------------------------------------------------|--------|--------|
| CHEMBL1978014 | <chem>O=C(n3nc(N([H])([H])c4c([H])c(c1nnn(c1[H])C([H])([H])c2c([H])c([H])c([H])c([H])c2[H])c([H])c([H])c34)C5([H])C([H])([H])C([H])([H])N(C([H])([H])C([H])([H])C5([H])[H])</chem>                                     | 251.19 | Active |
| CHEMBL1972258 | <chem>[H]N([H])C([H])([H])C([H])([H])C([H])([H])Oc2c([H])nc([H])c(C([H])=C([H])c1c([H])c([H])nc([H])c1[H])c2[H]</chem>                                                                                                 | 251.19 | Active |
| CHEMBL1977346 | <chem>O=C2N([H])c1c([H])c([H])c([H])c([H])c1N([H])c3nnc([I])c([H])c23</chem>                                                                                                                                           | 251.19 | Active |
| CHEMBL1964413 | <chem>[F]C([F])([F])c1c([H])c([H])c(c(c1[H])C([F])([F])F)C([H])([H])n2nnc(c2[H])c4c([H])c([H])c3n([H])nc([H])c3c4[H]</chem>                                                                                            | 251.19 | Active |
| CHEMBL1991356 | <chem>O=c3c2c([H])c(c1c([H])c([H])c([H])c(OC([H])([H])[H])c1[H])c([H])n2c4c(n3[H])c([H])c([H])c([H])c4[H]</chem>                                                                                                       | 251.19 | Active |
| CHEMBL2000934 | <chem>O=C(N([H])c2c([H])c([H])nc1c([H])c([H])c(c([H])c12)C([H])([H])C([H])([H])N([H])c3nc(c([H])c([H])c3[H])C([F])([F])F</chem>                                                                                        | 251.19 | Active |
| CHEMBL1988838 | <chem>O=[S](=O)(c3c([H])c([H])c([H])c(N([H])c1nc([H])c(c(n1)N([H])c2c([H])c([H])c(OC([H])([H])C(=O)N([H])[H])c([H])c2[H])C([H])([H])c3[H])N([H])[H]</chem>                                                             | 251.19 | Active |
| CHEMBL1965570 | <chem>O=C(N([H])c4c([H])c([H])c(c2c([H])[s]c1c(c([H])nc(N([H])[H])c12)c3c([H])c([H])oc3[H])c([H])c4[H])N([H])c5c([H])c([H])c([H])c([H])c5[F]</chem>                                                                    | 251.19 | Active |
| CHEMBL213505  | <chem>O=C(N([H])c3c([H])c([H])c(c2noc1nc([H])nc(N([H])[H])c12)c([H])c3[H])N([H])c4c([H])c([H])c([H])c(c4[H])C([F])([F])F</chem>                                                                                        | 251.19 | Active |
| CHEMBL546797  | <chem>[H]n1c(nc2c([H])c([H])c([H])c([H])c12)C(=NO[H])c4nc3c([H])c([H])c([H])c([H])c3n4[H]</chem>                                                                                                                       | 251.19 | Active |
| CHEMBL2007064 | <chem>[H]n1c(c(c(c1C([H])=C2C(=O)N([H])c3c([H])c([H])c([H])c([H])c23)C([H])([H])[H])C([H])([H])C([H])([H])C(=O)O[H])C([H])([H])</chem>                                                                                 | 251.19 | Active |
| CHEMBL574738  | <chem>O=C(N([H])c1c([H])c([H])c(c(c1[H])C([F])([F])F)C([H])([H])N2C([H])([H])C([H])([H])N(C([H])([H])C([H])([H])C([H])([H])C2([H])[H])N([H])c4c([H])c([H])c(Oc3nc([H])nc(c3[H])N([H])C([H])([H])[H])c([H])c4[H]</chem> | 316.23 | Active |
| CHEMBL1978099 | <chem>O=C(N([H])C([H])([H])[H]C([H])([H])Oc3c([H])c([H])c(N([H])c1nc(nc([H])c1[F])N([H])c2c([H])c([H])c(c(c2[H])[S](=O)(=O)N([H])[H])C([H])([H])[H])c([H])c3[H]</chem>                                                 | 316.23 | Active |
| CHEMBL1986143 | <chem>O=C(N([H])[C@@]([H])(c1c([H])c([H])c([H])c([H])c1[H])C([H])([H])C([H])([H])O[H])c3c([H])c([H])c(c2c([H])c([H])nc([H])c2[H])c([H])c3[H]</chem>                                                                    | 316.23 | Active |
| CHEMBL226471  | <chem>O=C3N([H])C([H])([H])C([H])([H])c4n([H])c(c2c([H])c([H])nc(c1c([H])c([H])c([H])c([H])c1[F])c2[H])c([H])c34</chem>                                                                                                | 316.23 | Active |
| CHEMBL2006580 | <chem>[Cl]c3c([H])[s]c2nc([H])nc(N([H])c1c([H])c([H])c(O[H])c([H])c1[H])c23</chem>                                                                                                                                     | 316.23 | Active |
| CHEMBL1991188 | <chem>O=C(N([H])[C@@]([H])(c1c([H])c([H])c([H])c(OC([H])([H])[H])c1[H])C([H])([H])[H])c3c([H])c([H])c(c2c([H])c([H])nc([H])c2[F])c([H])c3OC([H])([H])[H]</chem>                                                        | 316.23 | Active |
| CHEMBL1998829 | <chem>O=C(N([H])c3c([H])nc2n([H])c([H])c(c1c([H])c([H])c([H])c([H])c1[H])c2c3[H])c4c([H])c([H])c([Cl])c([H])c4[H]</chem>                                                                                               | 316.23 | Active |
| CHEMBL1994526 | <chem>O=C(N([H])c1c([H])c([H])nc([H])c1[H])[C@@]2([H])C([H])([H])C([H])([H])[C@@]([H])([C@@]([H])N([H])[H])C([H])([H])[H]C([H])([H])C2([H])[H]</chem>                                                                  | 316.23 | Active |
| CHEMBL1964687 | <chem>O=C(N([H])c1c([H])c(c([H])c(c1[H])C([H])([H])[H])C([H])([H])[H])N([H])c2c([H])c([H])c4c(c2[H])C([H])([H])C([H])([H])c5[s]c3nc([H])nc(N([H])[H])c3c45</chem>                                                      | 316.23 | Active |
| CHEMBL2001149 | <chem>[H]n1c(nc2c([H])c([H])c(O[H])c([H])c12)c6c([H])c([H])c([S]c5c([H])c([H])c(c4nc3c([H])c([H])c(O[H])c([H])c3n4[H])c([H])c5[H])c([H])c6[H]</chem>                                                                   | 316.23 | Active |

|               |                                                                                                                                                                                       |        |        |
|---------------|---------------------------------------------------------------------------------------------------------------------------------------------------------------------------------------|--------|--------|
| CHEMBL1999718 | N#Cc1c([H])c([H])c(nc1[H])N([H])C(=O)N([H])c3c([H])c([H])nc2c([H])c(c([H])c([H])c23)C([F])([F])[F]                                                                                    | 316.23 | Active |
| CHEMBL178737  | O=C3N([H])C(=O)C(c2c([H])nc1c([H])c([H])c([H])c([H])n12)=C3c5c([H])n7c4c(c([H])c([H])c([H])c45)C([H])([H])N(C(=O)N6C([H])([H])C([H])([H])OC([H])([H])C6([H])[H])C([H])([H])C7([H])[H] | 316.23 | Active |
| CHEMBL1997197 | [H]C([H])([H])Oc1c([H])c([H])c([H])c([H])c1C([H])([H])N([H])C(=N[H])N([H])c2nc([H])c([H])c(n2)c3[s]c([H])c([H])c3[H]                                                                  | 316.23 | Active |
| CHEMBL2007479 | O=C(c1[s]c(nc1N([H])[H])N([H])C([H])([H])C([H])([H])C([H])([H])C([H])([H])C([H])([H])c2c([H])c([H])c([H])c([H])c2[H]                                                                  | 316.23 | Active |
| CHEMBL243088  | O=C(O[H])c1c([H])c([H])c([H])c([H])c1N([H])c2nc(nc([H])c2[H])N([H])c3c([H])c([H])c([H])c(O[H])c3[H]                                                                                   | 316.23 | Active |
| CHEMBL2004615 | O=C(c2c([S]C([H])([H])[H])nn(c1nc([H])c([H])c([H])c1[H])c2N([H])[H])N([H])[H]                                                                                                         | 316.23 | Active |
| CHEMBL482538  | [H]n3c2nc([H])c([H])c(c1c([H])c([H])c([H])c([H])c1[H])c2c([H])c3[H]                                                                                                                   | 316.23 | Active |
| CHEMBL1994724 | O=C(N([H])[C@]([H])(c1c([H])c([H])c([H])c(OC([H])([H])[H])c1[H])C([H])([H])[H])c2[s]c(c([H])c2[H])c3c([H])c([H])nc([H])c3[H]                                                          | 316.23 | Active |
| CHEMBL1976240 | O=C(N([H])[C@]([H])(c1c([H])c([H])c([H])c(OC([H])([H])[H])c1[H])C([H])([H])N([H])[H])c3c([H])c([H])c(c2c([H])c([H])nc([H])c2[H])c([H])c3[H]                                           | 316.23 | Active |
| CHEMBL1973860 | [H]OC([H])([H])C([H])([H])N([H])c1nc([H])c3c(c1[H])c([H])c(c2c([H])c([H])[s]c2[H])c([H])c3[H]                                                                                         | 316.23 | Active |
| CHEMBL38380   | O=[S](=O)(c2c([H])c([H])c([H])c1c([H])nc([H])c([H])c12)N3C([H])([H])C([H])([H])C([H])([H])N([H])C([H])([H])C3([H])[H]                                                                 | 316.23 | Active |
| CHEMBL1990415 | O=C(N([H])c3nn([H])c2nc1c([H])c([H])c([H])c([H])c1c([H])c23)c4c([H])c([H])nc([H])c4[H]                                                                                                | 316.23 | Active |
| CHEMBL2002099 | N#CC([H])([H])[C@@]([H])(n1nc([H])c(c1[H])c3nc([H])nc2n([H])c([H])c([H])c23)[C@@]4([H])C([H])([H])C([H])([H])C([H])([H])C4([H])[H]                                                    | 316.23 | Active |
| CHEMBL1988153 | [F]C([F])([F])c4c([H])c([H])c(Oc2c1c([H])c([s]c1c([H])nc2[H])c3nnc(o3)C([H])([H])[H])c([H])c4[H]                                                                                      | 316.23 | Active |
| CHEMBL1974416 | O=C(N([H])c3c([H])nc2n([H])c([H])c(c1c([H])c([H])c([H])c([H])c1[H])c2c3[H])c4c([H])c([H])c([H])c([F])c4[F]                                                                            | 316.23 | Active |
| CHEMBL211378  | O=C(N([H])c1c([H])c([H])c([H])c(c1[H])C([H])([H])[H])N([H])c4c([H])c([H])c(c3noc2nc([H])nc(N([H])[H])c23)c([H])c4[H]                                                                  | 316.23 | Active |
| CHEMBL2001477 | O=C(N([H])[H])c2c([H])c([H])c(c1c([H])c([H])nc([H])c1[H])c([H])c2N([H])C([H])([H])c3c([H])c([H])c([H])c([H])c3[H]                                                                     | 316.23 | Active |
| CHEMBL1973016 | O=[S](=O)(c3c([H])c([H])c([H])c(C(=O)N([H])c2nc1c([H])c([H])c([H])c([H])c1n2C([H])([H])C([H])([H])C([H])([H])O[H])c3[H])C([H])([H])[H]                                                | 316.23 | Active |
| CHEMBL38380   | O=[S](=O)(c2c([H])c([H])c([H])c1c([H])nc([H])c([H])c12)N3C([H])([H])C([H])([H])C([H])([H])N([H])C([H])([H])C3([H])[H]                                                                 | 316.23 | Active |
| CHEMBL2006564 | O=C(N(c4c([H])c([H])c(N([H])c3nc(N([H])C1([H])C([H])([H])C1([H])[H])c2nc([H])n([H])c2n3)c([H])c4[H])C([H])([H])C([H])([H])C([H])([H])C([H])([H])C([H])[H]                             | 398.11 | Active |
| CHEMBL514499  | [F]C([F])([F])c1c(c([H])c([H])c([H])c1[H])C([H])([H])Oc2c([H])c([s]c2C(=O)N([H])[H])n4c([H])nc3c([H])c(OC([H])([H])[H])c(OC([H])([H])[H])c34                                          | 398.11 | Active |



|               |                                                                                                                                                                                                                                    |        |        |
|---------------|------------------------------------------------------------------------------------------------------------------------------------------------------------------------------------------------------------------------------------|--------|--------|
| CHEMBL1993781 | [H]N([H])[C@]([H])(C([H])([H])OC([H])([H])c1c([H])c([H])c([H])c([H])c1[H])C([H])([H])Oc3c([H])nc([H])c(C([H])=C([H])c2c([H])c([H])nc([H])c2[H])c3[H]                                                                               | 398.11 | Active |
| CHEMBL1967531 | O=C(N([H])c3c([H])c([H])c(c2c([H])s]c1nc([H])nc(N([H])[H])c12)c([H])c3[H])N([H])c4c([H])c([H])c([H])c([H])c4[H]                                                                                                                    | 398.11 | Active |
| CHEMBL1972221 | O=[S](=O)(N([H])c3c([H])c([H])c(c2c([H])c([H])c1n([H])nc(N([H])C(=O)C([H])([H])C([H])([H])c1c2[H])c([H])c3[H])C([H])([H])C([H])([H])C([H])([H])H                                                                                   | 398.11 | Active |
| CHEMBL1984296 | O=C(N([H])c1c(c([H])c([H])c(c1[H])C([H])([H])[H])C([H])([H])[H])c3c([H])c(nc2c([H])c([H])c([H])c([H])c23)c4oc([H])c([H])c4[H]                                                                                                      | 398.11 | Active |
| CHEMBL1996587 | [F]c5c([H])c([H])c(c1nc4n(c1c3nn2c(nnc2c([H])c3[H])C(C([H])([H])[H])(C([H])([H])[H])C([H])([H])O[H])C([H])([H])C([H])([H])C4([H])[H])c([F])c5[H]                                                                                   | 398.11 | Active |
| CHEMBL2002736 | [H]n2nc(N([H])[H])c1c(O[C@]([H])(C([H])([H])OC([H])([H])C([H])([H])[H])C([H])([H])[H])c([H])c([H])c([H])c12                                                                                                                        | 398.11 | Active |
| CHEMBL1984760 | O=C(N([H])C([H])([H])C([H])([H])C([H])([H])[H])c3c([H])c([H])c(N([H])c2nc(c1c([H])c([H])n([H])c1n2C([H])([H])C([H])([H])C([F])([F])[F])c([H])c3[H]                                                                                 | 398.11 | Active |
| CHEMBL1991818 | [H]C([H])([H])C([H])([H])N3c1c([H])c(N([H])[H])c([H])c([H])c1c2c([H])c([H])c(N([H])[H])c([H])c2[C@]3(O[H])c4c([H])c([H])c([H])c([H])c4[H]                                                                                          | 398.11 | Active |
| CHEMBL1994538 | O=C(N([H])c1nc([H])c([H])nc1[H])N([H])c3c([H])c([H])nc2c(c([H])c([H])c([H])c23)C([F])([F])[F]                                                                                                                                      | 398.11 | Active |
| CHEMBL1996979 | O=C(N([H])c3c([H])nc2n([H])c([H])c(c1c([H])c([H])c([H])c([H])c1[H])c2c3[H])c4c([F])c([H])c([H])c([H])c4[F]                                                                                                                         | 398.11 | Active |
| CHEMBL1982506 | O=C3c2c(nc([H])c1c([H])c(OC([H])([H])[H])c(OC([H])([H])[H])c([H])c12)C(=O)N3[H]                                                                                                                                                    | 398.11 | Active |
| CHEMBL1999414 | O=C(N([H])C([H])([H])C([H])([H])C([H])([H])N(C([H])([H])C([H])([H])[H])C([H])([H])C([H])([H])[H])c4c([H])nc(N([H])[H])c3c(c2c([H])c([H])c(N([H])C(=O)N([H])c1c([H])c([H])c([H])c(c1[H])C([H])([H])[H])c([H])c2[H])c([H])c34        | 398.11 | Active |
| CHEMBL2005475 | O=C(N([H])C([H])([H])C1([H])C([H])([H])C([H])([H])C([H])([H])C([H])([H])C1([H])[H])c2[s]c3c(c2[H])c(nn3[H])c4c([H])c([H])c([H])c([H])c4[H]                                                                                         | 398.11 | Active |
| CHEMBL1997822 | O=[S](=O)(c5c([H])c([H])c(c4c3[s]c([H])c(c2c([H])c1c([H])c(n([H])c1c([H])c2[H])C([H])([H])[H])c3c(nc4[H])N([H])[H])c5[H])C([H])([H])H                                                                                              | 398.11 | Active |
| CHEMBL1974288 | O=C(N([H])[C@@]([H])(c1c([H])c([H])c([H])c([H])c1[H])C([H])([H])O[H])c3c([H])c([H])c(c2c([H])c([H])nc([H])c2[H])c([H])c3[H]                                                                                                        | 398.11 | Active |
| CHEMBL1968705 | O=C(N([H])c6c([H])c([H])c([H])c(c5nc(N([H])c2c([H])c([H])c1n([H])nc([H])c1c2[H])c4c([H])c(OC([H])([H])C([H])([H])N3C([H])([H])C([H])([H])C([H])([H])C3([H])[H])c([H])c([H])c4n5)c6[H])C([H])([H])C([H])([H])C([H])([H])H           | 398.11 | Active |
| CHEMBL1974803 | O=c3n([H])c1c([H])c([Cl])c([H])c([Cl])c1c(c2c([H])c([Cl])c([H])c([H])c2O[H])c3O[H]                                                                                                                                                 | 398.11 | Active |
| CHEMBL1993781 | [H]N([H])[C@]([H])(C([H])([H])OC([H])([H])c1c([H])c([H])c([H])c([H])c1[H])C([H])([H])Oc3c([H])nc([H])c(C([H])=C([H])c2c([H])c([H])nc([H])c2[H])c3[H]                                                                               | 398.11 | Active |
| CHEMBL1997597 | O=[S](=O)(N([H])c3c([H])c([H])c(c2c([H])c([H])c1n([H])nc(N([H])[H])c1c2[H])c([H])c3[H])C([H])([H])C([H])([H])[H]                                                                                                                   | 398.11 | Active |
| CHEMBL1987009 | O=C(N([H])C([H])([H])c1c([H])c([H])c([H])c(OC([H])([H])[H])c1[H])c2[s]c3c(c2[H])c(nn3[H])c4c([H])c([H])c([H])c([H])c4[H]                                                                                                           | 398.11 | Active |
| CHEMBL124660  | O=C(N4C([H])([H])C([H])([H])N(c1nc([H])nc3c1c([H])c(OC([H])([H])[H])c(OC([H])([H])C([H])([H])C([H])([H])N2C([H])([H])C([H])([H])C([H])([H])C2([H])[H])c3[H])C([H])([H])C4([H])[H])N([H])c5c([H])c([H])c(OC([H])(C([H])([H])[H])C([ | 398.11 | Active |

|               |                                                                                                                                                                                                   |          |          |
|---------------|---------------------------------------------------------------------------------------------------------------------------------------------------------------------------------------------------|----------|----------|
| CHEMBL1966087 | [H]/C(=C(\[H])e2c([H])nc([H])c(O[C@]1([H])C([H])([H])C([H])([H])N([H])C1([H])[H])e2[H])e3c([H])c([H])nc([H])c3[H]                                                                                 | 398.11   | Active   |
| CHEMBL1970369 | O=C(N([H])[H])[C@]4([H])C([H])([H])C([H])([H])C([H])([H])N(C(=O)c1noc(c1[H])e3c([H])c([H])e2n([H])nc([H])e2c3[H])C4([H])[H]                                                                       | 398.11   | Active   |
| CHEMBL2002702 | O=C2/C(=C(/[H])c1c(c([H])c(n1[H])C([H])([H])[H])C([H])([H])[H])c3c(N2[H])c([H])c([H])c([H])c3[H]                                                                                                  | 398.11   | Active   |
| CHEMBL262623  | [H]N([H])c1nc([H])nc3c1/N=C(\c2c([H])c([H])c([H])c2[H])C([H])([H])C([H])([H])N3[H]                                                                                                                | 398.11   | Active   |
| CHEMBL296468  | O=C(N([H])e2nc([H])c([S]C([H])([H])c1nc([H])c(o1)C(C([H])([H])[H])(C([H])([H])[H])C([H])([H])[H])s2)C3([H])C([H])([H])C([H])([H])N([H])C([H])([H])C3([H])[H]                                      | 398.11   | Active   |
| CHEMBL1984686 | [Br]c3c([H])c([H])e2c([H])nc(N([H])c1nc([H])nc([H])c1[H])c([H])e2c3[H]                                                                                                                            | 398.11   | Active   |
| CHEMBL1972568 | [H]C([H])([H])Oe2c([H])nc([H])c(C([H])=C([H])c1c([H])c([H])nc([H])c1[H])e2[H]                                                                                                                     | 398.11   | Active   |
| CHEMBL1987533 | O=C(N([H])e2c([H])c([H])c1c([H])nn([H])c1e2[H])C([H])([H])c3c([H])c([H])c([H])c([H])c3[Cl]                                                                                                        | 398.11   | Active   |
| CHEMBL1978167 | [Br]c4nc3c([H])c(c1c([H])n(c2c1c([H])c([H])c([H])e2[H])C([H])([H])[H])n([H])c3nc4[H]                                                                                                              | 398.11   | Active   |
| CHEMBL1965589 | [F]c5c([H])c([H])c(c2nc1c(nc([H])c([H])n1c2c3nc(nc([H])c3[H])N([H])C([H])([H])C4(O[H])C([H])([H])C4([H])[H])C([H])([H])[H])c([F])e5[H]                                                            | 3,162.28 | Inactive |
| CHEMBL1991395 | [F]c4c([H])c([H])c(c2nc1c([H])nc([H])c([H])n1c2c3nc(nc([H])c3[H])N([H])C([H])([H])C(C([H])([H])[H])(C([H])([H])[H])C([H])([H])O[H])c([H])e4[H]                                                    | 3,162.28 | Inactive |
| CHEMBL387971  | [H]n2nc(c1c([H])c(C#CC([H])([H])OC([H])([H])C([H])([H])OC([H])([H])[H])s1[H])c3c2c4c(C3=O)c([H])c(c([H])e4[H])C([H])([H])N5C([H])([H])C([H])([H])N(C([H])([H])[H])C([H])([H])C5([H])[H]           | 3,162.28 | Inactive |
| CHEMBL1984788 | O=C(N([H])[H])e2c([H])c([Cl])c([H])c1n([H])c(nc12)c3c([H])c([H])c(c([H])c3[F])[C@]4([H])C([H])([H])C([H])([H])C([H])([H])N([H])C4([H])[H]                                                         | 3,162.28 | Inactive |
| CHEMBL1996923 | [Cl]c2c([H])c1nnn([H])c1c([H])e2[Cl]                                                                                                                                                              | 3,162.28 | Inactive |
| CHEMBL1996473 | O=c2n([H])c1c([H])c([H])c([Br])c([H])c1n2c3c([H])c([Cl])c(O[H])c([H])c3O[H]                                                                                                                       | 3,162.28 | Inactive |
| CHEMBL2007097 | O=c2nc(N([H])[H])c1c([s]c([H])c1[H])n2[H]                                                                                                                                                         | 3,162.28 | Inactive |
| CHEMBL2001539 | [H]n1nc([H])c3c1c2c([H])c([H])s2C([H])([H])C3([H])[H]                                                                                                                                             | 3,162.28 | Inactive |
| CHEMBL2007592 | O=c3n([H])c1[s]c5c(c1c2nc(nn23)c4e([H])c([H])c([H])c([H])e4[H])C([H])([H])C([H])([H])C([H])([H])C5([H])[H]                                                                                        | 3,162.28 | Inactive |
| CHEMBL2002446 | [H]n1nc(c3c1c2c([H])c([H])c(c([H])e2C3([H])[H])C([H])([H])N4C([H])([H])C([H])([H])N(C([H])([H])[H])C([H])([H])C4([H])[H])c6c([H])s)c(C#CC([H])([H])OC([H])([H])C5([H])C([H])([H])C5([H])[H])e6[H] | 3,162.28 | Inactive |
| CHEMBL2005186 | O=C(N([H])C([H])([H])C([H])([H])C([H])([H])C([H])([H])O)c5c([H])c([H])c([H])c(c4nc(N([H])e2c([H])c([H])c1n([H])nc([H])c1c2[H])e3c([H])c([H])c([H])c([H])c3n4)e5[H]                                | 3,162.28 | Inactive |
| CHEMBL1964718 | O=C2N([H])N=C1N(C([H])=C(C([H])=C1[H])C([H])([H])[H])C2([H])[H]                                                                                                                                   | 3,162.28 | Inactive |

|               |                                                                                                                                                                                                            |          |          |
|---------------|------------------------------------------------------------------------------------------------------------------------------------------------------------------------------------------------------------|----------|----------|
| CHEMBL1980144 | <chem>O=C(N([H])c1c(c([H])c([H])c([H])c1[H])C([H])([H])[H]N([H])c4c([H])c([H])c(N([H])C(=O)c3c([H])[s]c2nc([H])nc(N([H])[H])c23)c([H])c4[H])</chem>                                                        | 3,162.28 | Inactive |
| CHEMBL1967538 | <chem>O=c3c2[s]c1n(nc1c2nc([H])n3[H])C([H])([H])[H]C([H])([H])[H]</chem>                                                                                                                                   | 3,162.28 | Inactive |
| CHEMBL2005828 | <chem>O=C(N([H])c1c([H])c([H])c(c([H])c1[H])C([H])([H])[H]N([H])c4c([H])c([H])c(c3c([H])oc2nc([H])nc(N([H])[H])c23)c([H])c4[H])</chem>                                                                     | 3,162.28 | Inactive |
| CHEMBL1966722 | <chem>O=C(N([H])N([H])C(=[S])N([H])c1c([H])c([H])c([Cl])c([H])c1[H])C(O[H])(c2c([H])c([H])c([H])c([H])c2[H])c3c([H])c([H])c([H])c([H])c3[H]</chem>                                                         | 3,162.28 | Inactive |
| CHEMBL392642  | <chem>O=[N+](O-)]c1c([H])nc(nc1N([H])C([H])([H])[C@]2([H])C([H])([H])C([H])([H])[C@]([H])(C([H])([H])N([H])[H])C([H])([H])C2([H])[H])N</chem>                                                              | 3,162.28 | Inactive |
| CHEMBL2006188 | <chem>O=C(N([H])[C@@]([H])(c1c([H])c([H])c([H])c(OC([H])([H])[H])c1[H])C([H])([H])[H]c3c([H])c([H])c(c2c([H])c([H])nc([H])c2[H])c([H])c3N([H])C([H])([H])C([H])([H])C([H])([H])N([H])[H]</chem>            | 3,162.28 | Inactive |
| CHEMBL1995736 | <chem>O=C(OC([H])([H])C([H])([H])[H]c2c([H])c([H])c([H])c1n([H])c(nc12c4c([H])c([H])c(N3C([H])([H])C([H])([H])[C@]([H])N([H])[H])C3([H])[H])c([H])c4[H])</chem>                                            | 3,162.28 | Inactive |
| CHEMBL483158  | <chem>[Cl]c3c([H])c([H])c2c1nc(nc([H])c1C([H])([H])N=C(c2c3[H])c4c([F])c([H])c([H])c([H])c4OC([H])([H])[H]N([H])c5c([H])c(OC([H])([H])[H])c(c([H])c5[H])C(=O)O[H]</chem>                                   | 3,162.28 | Inactive |
| CHEMBL375293  | <chem>[H]c4c([H])nc([H])c(N([H])c2nc([H])c(c1nc([H])nc([H])c1[H])c(n2)c3oc([H])c([H])c3[H])c4[H]</chem>                                                                                                    | 3,162.28 | Inactive |
| CHEMBL1991800 | <chem>[F]c5c([H])c([H])c(c2nc1c(nc([H])c([H])n1c2c3nc(nc([H])c3[H])N([H])C([H])([H])C(C([H])([H])[H])C([H])([H])C([H])([H])O[H])C([H])([H])C4([H])C([H])([H])C4([H])[H])c([H])c5[H]</chem>                 | 3,981.07 | Inactive |
| CHEMBL1976093 | <chem>[F]c4c([H])c([H])c(c2nc1c([H])nc([H])c([H])n1c2c3nc(nc([H])c3[H])N([H])C([H])([H])C(C([H])([H])N(C([H])([H])[H])C([H])([H])C([H])([H])C([H])([H])C([H])([H])C([H])([H])C([H])([H])c([H])c4[H]</chem> | 3,981.07 | Inactive |
| CHEMBL1984367 | <chem>O=C(N([H])C([H])([H])c1c([H])c([H])c(N(C([H])([H])[H])C([H])([H])[H])c([H])c1[H])c2[s]c3c(c2[H])c(mn3[H])c4c([H])c([H])c([H])c([H])c4[H]</chem>                                                      | 3,981.07 | Inactive |
| CHEMBL1965909 | <chem>O=C4c2c(n([H])c1c([H])c([Cl])c([H])c([H])c1c2=O)C([H])([H])[C@@]([H])(c3c([H])c([H])c([H])c([H])c3[H])C4([H])[H]</chem>                                                                              | 3,981.07 | Inactive |
| CHEMBL2007336 | <chem>O=C(c3c([H])c([H])c([H])c(c2c([H])nc1c([H])c([H])c([H])c([H])c1c2[H])c3[H])C([H])([H])[H]</chem>                                                                                                     | 3,981.07 | Inactive |
| CHEMBL1993243 | <chem>O=C(N([H])C([H])([H])[H]C([H])=C([H])c4c([H])nc(N([H])[H])c3c(c2c([H])c([H])c1OC([H])([H])Oc1c2[H])c([H])[s]c34</chem>                                                                               | 3,981.07 | Inactive |
| CHEMBL1974875 | <chem>O=C(O[H])c1c([H])[s]c2c1N([H])C([H])([H])C([H])([H])N([H])C2=O</chem>                                                                                                                                | 3,981.07 | Inactive |
| CHEMBL1987815 | <chem>O=C(N([H])[H])c2nc1n(nc([H])c1[H])c(c2[H])c3[s]c([H])c([H])c3[H]</chem>                                                                                                                              | 3,981.07 | Inactive |
| CHEMBL1979883 | <chem>O=C(N([H])c1c([H])c([H])c([H])c(c1[H])C([H])([H])[H]N([H])c4c([H])c([H])c(c3c([H])[s]c2c(C#CC([H])([H])N(C([H])([H])[H])C([H])([H])[H])c([H])nc(N([H])[H])c23)c([H])c4[H]</chem>                     | 3,981.07 | Inactive |
| CHEMBL1968515 | <chem>O=C3N([H])N=C1N(c2c(OC1([H])[H])c([H])c([H])c([H])c2[H])C3([H])[H]</chem>                                                                                                                            | 3,981.07 | Inactive |
| CHEMBL1999112 | <chem>O=C(OC([H])([H])C([H])([H])[H])C3=c2[s]c(=C([H])c1oc([H])c([H])c1[H])c(=O)n2C(N([H])[H])=C(C#N)[C@@]3([H])c4oc([H])c([H])c4[H]</chem>                                                                | 3,981.07 | Inactive |
| CHEMBL1969190 | <chem>O=C(N([H])c3c([H])c([H])c(c2c([H])c([H])c(OC([H])([H])[H])c1onc(c12)N([H])[H])c([H])c3[H])N([H])c4c([H])c([F])c([H])c([F])c4[H]</chem>                                                               | 3,981.07 | Inactive |

|               |                                                                                                                                                                                                                                                            |          |          |
|---------------|------------------------------------------------------------------------------------------------------------------------------------------------------------------------------------------------------------------------------------------------------------|----------|----------|
| CHEMBL1981492 | <chem>O=C(OC([H])([H])[H])c2c(nc1c([H])c([H])c([H])c([H])n12)N([H])[H]</chem>                                                                                                                                                                              | 3,981.07 | Inactive |
| CHEMBL1979093 | <chem>O=C(N([H])c3c([H])c([H])c(c2c([H])c([H])c(OC([H])([H])[H])c1onc(c12)N([H])[H])c([H])c3[H])N([H])c4c([H])c([H])c([F])c(c4[H])C([H])([H])[H]</chem>                                                                                                    | 3,981.07 | Inactive |
| CHEMBL1971649 | <chem>[F]c1c([H])c([H])c(c([H])c1N([H])C(=O)N([H])c4c([H])c([H])c(c3c([H])c([H])c2nc([H])c([H])nc2c3N([H])[H])c([H])c4[H])C([H])([H])[H]</chem>                                                                                                            | 3,981.07 | Inactive |
| CHEMBL1988622 | <chem>[H]/C(=C(\[H])c2nn1c(nc([H])c1[H])c([H])c2[H])c3c([H])c([H])c([H])c([H])c3[H]</chem>                                                                                                                                                                 | 3,981.07 | Inactive |
| CHEMBL1991782 | <chem>O=C1N([H])C([H])([H])c2c1c([H])c([H])c([H])c2c3[s]c([H])c([H])c3[H]</chem>                                                                                                                                                                           | 3,981.07 | Inactive |
| CHEMBL1990288 | <chem>[F]c5c([H])c([H])c(c2nc1oc([H])c([H])n1c2c3nc(nc([H])c3[H])N([H])[C@]([H])(c4c([H])c([H])c([H])c([H])c4[H])C([H])([H])[H])c([H])c5[H]</chem>                                                                                                         | 3,981.07 | Inactive |
| CHEMBL31      | <chem>[F]c1c(c(OC([H])([H])[H])c2c(c1[H])c(=O)c(C(=O)O[H])c([H])n2[C@@]3([H])C([H])([H])C3([H])[H])N4C([H])([H])C([H])([H])N([H])[C@]([H])(C([H])([H])[H])C4([H])[H]</chem>                                                                                | 3,981.07 | Inactive |
| CHEMBL1973145 | <chem>O=C(N([H])c1c([H])c([H])c([H])c(c1[H])C([H])([H])[H])N([H])c4c([H])c([H])c(c3c([H])[s]c2nc(nc(N([H])[H])c23)N([H])[H])c([H])c4[H]</chem>                                                                                                             | 3,981.07 | Inactive |
| CHEMBL1971694 | <chem>[O-][s+]1nc(N([H])C([H])([H])C([H])([H])C([H])([H])C([H])([H])[H])c(n1)N([H])c2c([H])c([H])c([F])c([H])c2[H]</chem>                                                                                                                                  | 3,981.07 | Inactive |
| CHEMBL316264  | <chem>[F]c4c([H])c([H])c(c3nc(c1c([H])c([H])c([F])c([H])c1[H])c(c2c([H])c([H])nc([H])c2[H])n3[H])c([H])c4[H]</chem>                                                                                                                                        | 3,981.07 | Inactive |
| CHEMBL1972583 | <chem>O=C(N([H])[H])c3c([H])nn2c(c1c([H])c([H])c([H])c([H])c1[H])c([H])c([H])nc23</chem>                                                                                                                                                                   | 3,981.07 | Inactive |
| CHEMBL1972937 | <chem>O=C2C([S]/C(=N\c1c([H])c([H])c([H])c1[H])N2[H])=C([H])c3c([H])c([H])c([H])c(OC([H])([H])[H])c3[H]</chem>                                                                                                                                             | 3,981.07 | Inactive |
| CHEMBL1980163 | <chem>[H]c1c([H])c([H])c(c([H])c1[H])C([H])([H])Oc4c([H])c([H])c(N([H])c3nc([H])nc2c([H])c([H])c([H])c([H])c23)c([H])c4[H]</chem>                                                                                                                          | 5,011.87 | Inactive |
| CHEMBL1972584 | <chem>O=C(N7C([H])([H])C([H])([H])N([C@@]6([H])C([H])([H])C([H])([H])[C@@]([H])(n4nc(c3c([H])c([H])c(N([H])C(=O)c2c([H])c1c([H])c([H])c([H])c([H])c1n2C([H])([H])[H])c([H])c3[H])c5c(nc([H])nc45)N([H])[H])C([H])([H])C6([H])[H])C([H])([H])C7([H])</chem> | 5,011.87 | Inactive |
| CHEMBL1976872 | <chem>O=C(N([H])c1nn2c(c1[H])c([H])c([H])c2[H])C([H])([H])[H]</chem>                                                                                                                                                                                       | 5,011.87 | Inactive |
| CHEMBL1999120 | <chem>O=c1c([H])c(c2c(n1[H])n([H])n([H])c2=O)C([H])(C([H])([H])[H])C([H])([H])[H]</chem>                                                                                                                                                                   | 5,011.87 | Inactive |
| CHEMBL2005214 | <chem>[H]n1nc(c2c1O/C(=C/C#N)[C@]2([H])c3c([H])c([H])c([H])c3[Br])N([H])[H])C([H])([H])[H]</chem>                                                                                                                                                          | 5,011.87 | Inactive |
| CHEMBL1972584 | <chem>O=C(N7C([H])([H])C([H])([H])N([C@@]6([H])C([H])([H])C([H])([H])[C@@]([H])(n4nc(c3c([H])c([H])c(N([H])C(=O)c2c([H])c1c([H])c([H])c([H])c([H])c1n2C([H])([H])[H])c([H])c3[H])c5c(nc([H])nc45)N([H])[H])C([H])([H])C6([H])[H])C([H])([H])C7([H])</chem> | 5,011.87 | Inactive |
| CHEMBL1979577 | <chem>O=C(N([H])c1c([H])c([H])c([H])c(c1[H])C([H])([H])[H])N([H])c4c([H])c([H])c(c3c([H])[s]c2c(C#CC(N([H])[H])(C([H])([H])[H])C([H])([H])[H])c([H])nc(N([H])[H])c23)c([H])c4[H]</chem>                                                                    | 5,011.87 | Inactive |
| CHEMBL1994159 | <chem>O=C(c3c([H])c([H])c([H])c(c2nn1c(nc([H])c1[H])c([H])c2[H])c3[H])C([H])([H])[H]</chem>                                                                                                                                                                | 5,011.87 | Inactive |
| CHEMBL1983195 | <chem>O=C(N(C([H])([H])C([H])([H])[H])C([H])([H])C([H])([H])[H])N([H])c3c([H])c([H])c2nc(c1oc([H])c([H])c1[H])c(nc2c3[H])c4oc([H])c([H])c4[H]</chem>                                                                                                       | 5,011.87 | Inactive |

|               |                                                                                                                                                                                          |          |          |
|---------------|------------------------------------------------------------------------------------------------------------------------------------------------------------------------------------------|----------|----------|
| CHEMBL1980376 | [H]C([H])([H])c3c([H])c([H])c([H])c(c2c([H])c([H])c([H])c1onc(N([H])[H])c12)c3[H]                                                                                                        | 5,011.87 | Inactive |
| CHEMBL1973399 | O=C(N([H])[H])c1c([H])[s]c2c1N([H])C([H])([H])C([H])([H])C2=O                                                                                                                            | 5,011.87 | Inactive |
| CHEMBL2002240 | O=C(N([H])c1nc(c(C#N)c(c1[H])N([H])[H])c3c([H])c([H])c2c([H])c([H])c([H])c([H])c2c3[H])C([H])([H])[H]                                                                                    | 5,011.87 | Inactive |
| CHEMBL1965423 | [F]c5c([H])c([H])c(c2nc1[s]c([H])c([H])n1c2c4c([H])c([H])c3nc(n(c3c4[H])C([H])([H])C([H])(C([H])([H])[H])C([H])([H])[H])N([H])[H])c([H])c5[H]                                            | 5,011.87 | Inactive |
| CHEMBL1970950 | O=C(O[H])c1c([H])c([H])c([H])c([H])c1N([H])c2nc(nc([H])c2[H])N([H])C([H])([H])c3c([H])c([H])c([H])c(O[H])c3[H]                                                                           | 5,011.87 | Inactive |
| CHEMBL1972576 | O=C(N([H])c1c([H])c([H])c(c([H])c1[H])C([H])([H])[H]N([H])c4c([H])c([H])c(N([H])C(=O)c3c([H])[s]c2nc([H])nc(N([H])[H])c23)c([H])c4[H]                                                    | 5,011.87 | Inactive |
| CHEMBL1984586 | O=C(N([H])c1c(c([H])c([H])c([H])c1[H])C([H])([H])[H]N([H])c4c([H])c([H])c(c3c([H])oc2nc([H])nc(N([H])[H])c23)c([H])c4[H]                                                                 | 5,011.87 | Inactive |
| CHEMBL1991867 | [H]n2nc(N([H])[H])c1[s]c([Cl])nc12                                                                                                                                                       | 5,011.87 | Inactive |
| CHEMBL1966279 | O=[S](=O)(N([H])C([H])([H])C([H])([H])N([H])[H])c4c([H])c([H])c([H])c(C(=O)N([H])c3c([H])c([H])c(c2nn([H])c(=O)c1c([H])c([H])c([H])c([H])c12)c([H])c3[H])c4[H]                           | 5,011.87 | Inactive |
| CHEMBL1988000 | O=C(N=c1[s]c(c(n1C([H])([H])C([H])([H])OC([H])([H])C([H])([H])C([H])([H])[H])c2c([H])c([S]C([H])([H])[H])c([H])c([H])c2[Cl]                                                              | 5,011.87 | Inactive |
| CHEMBL1965988 | O=C(N([H])c1c([H])c([H])c([H])c(c1[H])C([H])([H])[H]N([H])c4c([H])c([H])c(c3c([H])[s]c2c(C#CC([H])([H])N([H])[H])c([H])nc(N([H])[H])c23)c([H])c4[H]                                      | 5,011.87 | Inactive |
| CHEMBL1982465 | O=C(N([H])c1c([H])c([H])c([H])c(c1[H])C([H])([H])[H]N([H])c5c([H])c([H])c(c4c([H])[s]c3c(C#CC([H])([H])N2C([H])([H])C([H])([H])OC([H])([H])C2([H])[H])c([H])nc(N([H])[H])c34)c([H])c5[H] | 6,309.57 | Inactive |
| CHEMBL2002165 | O=C(N([H])c4c([H])c([H])c(c3c2c(nc([H])c(c1c([H])n(nc1[H])C([H])([H])[C@@]([H])(O[H])C([H])([H])[H])c2[s]c3[H])N([H])[H])c([H])c4[H])N([H])c5c([H])c([H])c([H])c([F])c5[H]               | 6,309.57 | Inactive |
| CHEMBL1986328 | O=C(N(C([H])([H])[H])C([H])([H])[H]N([H])c3c([H])c([H])c2nc(c1oc([H])c([H])c1[H])c(nc2c3[H])c4oc([H])c([H])c4[H]                                                                         | 6,309.57 | Inactive |
| CHEMBL1975815 | O=C4c2c(n([H])c1c([H])c([Cl])c([H])c([H])c1c2=O)C([H])([H])[C@@]([H])(c3c([H])c([H])c([F])c([H])c3[H])C4([H])[H]                                                                         | 6,309.57 | Inactive |
| CHEMBL1983630 | O=C2N([H])c1nc([H])c(c([H])c1C2([H])[H])c3c([H])c([H])c([H])c([H])c3[H]                                                                                                                  | 6,309.57 | Inactive |
| CHEMBL1990884 | O=C(c4c([H])c([H])c(c3c([H])c([H])c(N([H])c2oc1c(c([H])c(c([H])c1n2)C([H])([H])[H])C([H])([H])[H])c([F])c3[H])c4N([H])[H])N([H])[H]                                                      | 6,309.57 | Inactive |
| CHEMBL17370   | [F]c4c([H])c([H])c(c2nc(c1c([H])c([H])c([S]C([H])([H])[H])c([H])c1[H])n([H])c2c3c([H])c([H])nc([H])c3[H])c([H])c4[H]                                                                     | 6,309.57 | Inactive |
| CHEMBL1973937 | O=C(N([H])c3c([H])c([H])c(c1c([H])c([H])c(c2c1c(nn2[H])N([H])[H])C([H])([H])[H])c([H])c3[H])N([H])c4c([H])c([H])c([H])c([Br])c4[H]                                                       | 6,309.57 | Inactive |
| CHEMBL1984500 | O=C1N([H])C([H])([H])c2c([Br])c([H])c([H])c([H])c12                                                                                                                                      | 6,309.57 | Inactive |
| CHEMBL1978200 | [F]c4c([H])c([H])c(c2nc1c(nc([H])c([H])n1c2c3nc(nc([H])c3[H])N([H])C([H])([H])C([H])([H])C(O[H])C([H])([H])[H])C([H])([H])[H])C([H])([H])[H])c([F])c4[H]                                 | 6,309.57 | Inactive |

|               |                                                                                                                                                                                                                                                |          |          |
|---------------|------------------------------------------------------------------------------------------------------------------------------------------------------------------------------------------------------------------------------------------------|----------|----------|
| CHEMBL1989569 | <chem>O=C(c3c2nc(c1c([H])c([H])c([H])c(OC([H])([H])C([H])([H])N(C([H])([H])([H])C([H])([H])([H])c1[H])n([H])c2c([H])c([H])c3[H])N([H])[H])</chem>                                                                                              | 6,309.57 | Inactive |
| CHEMBL2003456 | <chem>O=c3n([H])c2c([H])c(c1c([H])c([H])c([H])c([H])c1[H])c([H])nc2n3[H]</chem>                                                                                                                                                                | 6,309.57 | Inactive |
| CHEMBL1967720 | <chem>O=C(N([H])([H])C(n1nc([H])c(c1[H])c5c([H])nc(N([H])([H])c4c(c3c([H])c([H])c(N([H])C(=O)N([H])c2c([H])c([H])c([H])c([F])c2[H])c([H])c3[H])c([H])[s]c45)(C([H])([H])[H])C([H])([H])[H])</chem>                                             | 6,309.57 | Inactive |
| CHEMBL1990432 | <chem>O=C4c2c(n([H])c1c([H])c([Cl])c([H])c([H])c1c2=O)C([H])([H])[C@@]([H])(c3c([H])c([H])c([Cl])c([H])c3[H])C4([H])[H]</chem>                                                                                                                 | 6,309.57 | Inactive |
| CHEMBL1997872 | <chem>O=C(c3c([H])c([H])c([H])c(c2c([H])nc1n([H])c([H])c([H])c1c2[H])c3[H])N4C([H])([H])C([H])([H])OC([H])([H])C4([H])[H]</chem>                                                                                                               | 6,309.57 | Inactive |
| CHEMBL354676  | <chem>O=C(N([H])c1c([H])c([H])c([H])c([H])c1[H])N([H])c2c([H])c([H])c([H])c([H])c2[H]</chem>                                                                                                                                                   | 7,943.28 | Inactive |
| CHEMBL2004311 | <chem>O=C(N([H])c1c([H])c(c([H])c(c1[H])C([H])([H])([H])C([H])([H])([H])N([H])c4c([H])c([H])c(c2c([H])c([H])c([H])c3c2C([H])([H])N([H])C3=O)c(c4[H])C([H])([H])[H])</chem>                                                                     | 7,943.28 | Inactive |
| CHEMBL1982874 | <chem>[F]c6c([H])c([H])c(c2nc1[s]c([H])c([H])n1c2c4c([H])c([H])c3nc(N([H])([H])n(c3c4[H])C([H])([H])C5([H])C([H])([H])C5([H])[H])c([H])c6[H]</chem>                                                                                            | 7,943.28 | Inactive |
| CHEMBL1984402 | <chem>O=C(c1c(nn(c(=O)c1N([H])([H])C([H])([H])([H])c2c([H])c([H])c([H])c([H])c2[H])C([H])([H])[H])</chem>                                                                                                                                      | 7,943.28 | Inactive |
| CHEMBL1975256 | <chem>O=C(c2nnc(c1nonc1N([H])([H])c2c3[s]c([H])c([H])c3[H])N([H])N=C([H])c4[s]c([H])c([H])c4[H]</chem>                                                                                                                                         | 7,943.28 | Inactive |
| CHEMBL1999778 | <chem>N#Cc1c(nc(OC([H])([H])[H])c(C#N)c1c2c([H])c([H])c([Cl])c([H])c2[Cl])N([H])[H]</chem>                                                                                                                                                     | 7,943.28 | Inactive |
| CHEMBL1964644 | <chem>O=C(N([H])C([H])([H])c1c([H])c([H])c([H])c([H])c1[H])N([H])c2nc([H])c([s]2)[N+](=O)[O-]</chem>                                                                                                                                           | 7,943.28 | Inactive |
| CHEMBL1983025 | <chem>O=C(N([H])c3c([H])c([H])c(c2c1c(nc([H])c(C#CC(N([H])([H])C([H])([H])C([H])([H])([H])C([H])([H])C([H])([H])([H])c1[s]c2[H])N([H])([H])c([H])c3[H])N([H])c4c([H])c([H])c([H])c(c4[H])C([H])([H])[H])</chem>                                | 7,943.28 | Inactive |
| CHEMBL491758  | <chem>[F]c1c([H])nc(nc1N([H])c2c([H])c([H])c([H])c([H])c2[H])N([H])c3c([H])c([H])c([H])c([H])c3[H]</chem>                                                                                                                                      | 7,943.28 | Inactive |
| CHEMBL1968926 | <chem>[H]n1nc(nc1[S]C([H])([H])c2c([H])c([H])c([H])c([H])c2[H])c3c([H])c([H])nc([H])c3[H]</chem>                                                                                                                                               | 7,943.28 | Inactive |
| CHEMBL2002450 | <chem>[H]C([H])([H])Oc3c([H])c([H])c(c1c([H])c([H])c(N([H])([H])c([H])c1[H])c2c([H])noc23</chem>                                                                                                                                               | 7,943.28 | Inactive |
| CHEMBL1984162 | <chem>[H]C([H])([H])OC([H])([H])C([H])([H])O[C@]6([H])C([H])([H])C([H])([H])[C@]([H])(n4nc(c3c([H])c([H])c(N([H])c2nc1c([H])c(c([H])c(c1o2)C([H])([H])([H])C([H])([H])[H])c([H])c3[H])c5c(nc([H])nc45)N([H])([H])C([H])([H])C6([H])[H])</chem> | 7,943.28 | Inactive |
| CHEMBL1971245 | <chem>O=C(c2nc1c([H])c([H])c([H])c([H])n1c2c3nc(nc([H])c3[H])N([H])c5c([H])c([H])c([H])c(N4C([H])([H])C([H])([H])N(C([H])([H])C([H])([H])C4([H])[H])c5[H])N([H])[H])</chem>                                                                    | 7,943.28 | Inactive |
| CHEMBL1983884 | <chem>[H]N([H])c3nc([H])nc2nc1c([H])c([H])c([H])c([H])c1n23</chem>                                                                                                                                                                             | 7,943.28 | Inactive |
| CHEMBL1970189 | <chem>[H]n1nc(c2c1O/C(=C(/C#N)[C@]2([H])c3c([H])c([H])c([H])c([H])c3[Cl])N([H])([H])C([H])([H])[H])</chem>                                                                                                                                     | 7,943.28 | Inactive |
| CHEMBL1968590 | <chem>O=C(N([H])C([H])([H])([H])C([H])=C([H])c4c([H])nc(N([H])([H])c3c(c2c([H])c([H])c1[s]c(nc1c2[H])C([H])([H])([H])c([H])[s]c34</chem>                                                                                                       | 7,943.28 | Inactive |

|               |                                                                                                                                                                                                   |          |          |
|---------------|---------------------------------------------------------------------------------------------------------------------------------------------------------------------------------------------------|----------|----------|
| CHEMBL1973211 | O=C(N([H])c1c([H])c([H])c([H])c(c1[H])C([H])([H])[H]N([H])c5c([H])c([H])c(c4c([H])[s]c3c(C#CC([H])([H])N2C([H])([H])C([H])([H])C([H])([H])C2([H])[H])c([H])nc(N([H])[H])e34c([H])c5[H]            | 7,943.28 | Inactive |
| CHEMBL117217  | O=C4c2c(nc1c([H])c([H])c([Cl])c([H])c1c2O[H])C([H])([H])[C@@]([H])(c3c([H])c([H])c([Cl])c([H])c3[Cl])C4([H])[H]                                                                                   | 7,943.28 | Inactive |
| CHEMBL354676  | O=C(N([H])c1c([H])c([H])c([H])c([H])c1[H])N([H])c2c([H])c([H])c([H])c([H])c2[H]                                                                                                                   | 7,943.28 | Inactive |
| CHEMBL1980704 | [H]C([H])([H])c5c([H])c3nnc([S]C([H])([H])c1nc2n(c1[H])c([H])c([H])c([H])c2[H])n3c4c([H])c([H])c([H])c([H])c45                                                                                    | 7,943.28 | Inactive |
| CHEMBL1393571 | N#Cc3c([H])nn2c(c1c([H])c([H])c([H])c([H])c1[H])c([H])c([H])nc23                                                                                                                                  | 10,000   | Inactive |
| CHEMBL1985042 | O=c1c([H])c(c3c(n1[H])n([H])n(c2c([H])c([H])c([H])c([H])c2[H])c3=O)C([H])([H])[H]                                                                                                                 | 10,000   | Inactive |
| CHEMBL1986781 | O=C(N5C([H])([H])C([H])([H])C([H])(N([H])c1nc([H])c([H])c(n1)c3c(nc2oc([H])c([H])n23)c4c([H])c([H])c([F])c([H])c4[H])C([H])([H])C5([H])[H])C([H])([H])[H]                                         | 10,000   | Inactive |
| CHEMBL2002182 | O=c3n([H])nc2c(c1c([H])c([H])c([H])c([H])c1[H])c([H])c([H])c([H])n23                                                                                                                              | 10,000   | Inactive |
| CHEMBL272453  | O=C(N([H])c1c([H])c([H])c(OC([H])([H])[H])c([Cl])c1[H])N([H])c4c([H])c([H])c(c3c([H])c([H])c([H])c2onc(N([H])[H])c23)c([H])c4[H]                                                                  | 10,000   | Inactive |
| CHEMBL1682558 | [F]c5c([H])c([H])c(c1nc([H])n(c1c3c([H])c([H])c2n([H])nc([H])c2c3[H])C([H])([H])C([H])([H])N4C([H])([H])C([H])([H])OC([H])([H])C4([H])[H])c([H])c5[H]                                             | 10,000   | Inactive |
| CHEMBL208637  | O=C(N([H])c1nc(OC([H])([H])C([H])([H])[H])c(C#N)c(c1[H])N([H])[H])C([H])([H])[H]                                                                                                                  | 10,000   | Inactive |
| CHEMBL1972820 | O=C(O[H])c3c([H])c([H])c(N2C(=O)c1c([H])c([H])c([H])c([H])c1C2=O)c([H])c3O[H]                                                                                                                     | 10,000   | Inactive |
| CHEMBL1970806 | O=c3n([H])c1[s]c5c(c1c2nc(n23)c4c([H])c([H])c([H])nc4[H])C([H])([H])C([H])([H])C([H])([H])C5([H])[H]                                                                                              | 10,000   | Inactive |
| CHEMBL1972849 | [F]c5c([H])c([H])c(c2nc1oc([H])c([H])n1c2c4nn3c(nnc3c([H])c4[H])C(C([H])([H])[H])C([H])([H])[H])C([H])([H])O[H])c([F])c5[H]                                                                       | 10,000   | Inactive |
| CHEMBL1970142 | O=C(N([H])C([H])([H])[H])[C@@]([H])(n1nc([H])c(c1[H])c5c([H])nc(N([H])[H])c4c(c3c([H])c([H])c(N([H])C(=O)N([H])c2c([H])c([H])c(c([H])c2[H])C([H])([H])[H])c([H])c3[H])c([H])[s]c45)C([H])([H])[H] | 10,000   | Inactive |
| CHEMBL1992306 | O=C(N([H])C([H])([H])[H])c3nc([H])c([H])c(Oc2c([H])c([H])c(N([H])C(=O)N([H])c1c([H])c([H])c([H])c(c1[H])C([F])([F])[F])c([H])c2[H])c3[H]                                                          | 10,000   | Inactive |
| CHEMBL184847  | O=C(N([H])c1c([H])c([H])c(c(c1[H])C([H])([H])[H])C([H])([H])[H])N([H])c4c([H])c([H])c(c2c([H])c([H])c([H])c3c2C([H])([H])N([H])C3=O)c([H])c4[H]                                                   | 10,000   | Inactive |
| CHEMBL1989474 | [F]c3c([H])c([H])c(c1nn(c([H])c1c2nc([H])nc([H])c2[H])C([H])([H])[H])c([H])c3[H]                                                                                                                  | 10,000   | Inactive |
| CHEMBL2004447 | [H]n1nc(c2c1O/C(=C/C#N)[C@]2([H])c3c([H])c([H])c([H])c([H])c3[F])N([H])[H])C(C([H])([H])[H])C([H])([H])[H])C([H])([H])c([H])([H])C([H])([H])C([H])([H])[H]                                        | 10,000   | Inactive |
| CHEMBL95692   | [F]c4c([H])c([H])c(c1nc([H])n(c1c2nc(OC([H])([H])[H])nc([H])c2[H])C3([H])C([H])([H])C([H])([H])N([H])C([H])([H])C3([H])[H])c([H])c4[H]                                                            | 10,000   | Inactive |
| CHEMBL210928  | O=C(N([H])c1nc(OC([H])([H])C([H])([H])[H])c([Cl])c(c1[H])N([H])[H])C([H])([H])c2c([H])c(OC([H])([H])[H])c(c([H])c2OC([H])([H])[H])[S](=O)(=O)C([H])([H])[H]                                       | 10,000   | Inactive |

|               |                                                                                                                                                                                                                                                                 |        |          |
|---------------|-----------------------------------------------------------------------------------------------------------------------------------------------------------------------------------------------------------------------------------------------------------------|--------|----------|
| CHEMBL1989708 | <chem>O=C(N([H])c1c([H])c([H])c([H])c(c1[H])C([H])([H])[H]N([H])c5c([H])c([H])c(c4c([H])[s]c3c(c2c([H])nn(c2[H])C([H])([H])[C@]([H])([H])O[H])C([H])([H])[H]c([H])nc(N([H])[H])c34c([H])c5[H]</chem>                                                            | 10,000 | Inactive |
| CHEMBL1975121 | <chem>O=C(N([H])[C@]([H])(c1c([H])c([H])c([H])c(OC([H])([H])[H])c1[H])C([H])([H])[H]c3c([H])c([H])c(c2c([H])c([H])nc([H])c2[H])c([H])c3[H]</chem>                                                                                                               | 10,000 | Inactive |
| CHEMBL1976732 | <chem>[F]c5c([H])c([H])c(c2nc1oc([H])c([H])n1c2c4nn3c(nnc3c([H])c4[H])C([H])([H])C(O[H])(C([H])([H])[H])C([H])([H])[H]c(F)c5[H]</chem>                                                                                                                          | 10,000 | Inactive |
| CHEMBL1967560 | <chem>O=C2N(N(c1nc(nc([H])c1N2C([H])([H])[H]N([H])c4c([H])c([H])c(C=O)N([H])[C@]3([H])C([H])([H])C([H])([H])N(C([H])([H])[H])C([H])([H])C3([H])[H]c([H])c4OC([H])([H])[H])[C@@]5([H])C([H])([H])C([H])([H])C([H])([H])C5([H])[H])C([H])([H])C([H])([H])C</chem> | 10,000 | Inactive |
| CHEMBL2000801 | <chem>O=C(N([H])c3c([H])c([H])c(c2c([H])c([H])c([H])c1[s]nc([H])c12c([H])c3[H])N([H])c4c([H])c([H])c(F)c4[H])C(F)(F)[F]</chem>                                                                                                                                  | 10,000 | Inactive |
| CHEMBL1972142 | <chem>O=C(N([H])C([H])([H])c1c([H])c([H])c([H])c([H])c1[H]c4c([H])c([H])c([H])c(c3c([H])nc2n([H])c([H])c([H])c2c3[H])c4[H]</chem>                                                                                                                               | 10,000 | Inactive |
| CHEMBL1825138 | <chem>[Cl]c1c(c([Cl])c(F)c([H])c1[H])[C@]([H])(Oc4c([H])c(c2c([H])nn(c2[H])[C@@]3([H])C([H])([H])C([H])([H])N([H])C([H])([H])C3([H])[H]c([H])nc4N([H])[H])C([H])([H])[H]</chem>                                                                                 | 10,000 | Inactive |
| CHEMBL1982361 | <chem>O=c3c(N([H])C([H])([H])c1c([H])c([H])c([H])c([H])c1[F])c(N([H])c2c([H])c([H])nc([H])c2[H])c3=O</chem>                                                                                                                                                     | 10,000 | Inactive |
| CHEMBL539474  | <chem>O=C1N(C([H])([H])C([H])([H])C1([H])[H])C([H])([H])c2c([H])c([H])c3c(c2[H])n([H])c(=O)c4c([H])c([H])c([H])n34</chem>                                                                                                                                       | 10,000 | Inactive |
| CHEMBL1624529 | <chem>[F]c1c(nc2c(c1[H])c(=O)c(C(=O)O[H])c([H])n2c3c([H])c([H])c(F)c([H])c3[F])N5C([H])([H])[C@@]4([H])[C@]([H])(N([H])[H])[C@@]4([H])C5([H])[H]</chem>                                                                                                         | 10,000 | Inactive |
| CHEMBL1969879 | <chem>O=C(N3C([H])([H])C([H])([H])[C@@]([H])(C([H])([H])[H])[C@@]([H])(N(c2nc([H])nc1n([H])c([H])c([H])c12)C([H])([H])[H])C3([H])[H])C([H])([H])O[H]</chem>                                                                                                     | 10,000 | Inactive |
| CHEMBL1971021 | <chem>O=C(N([H])c1c([H])c([H])c(c1[H])C([H])([H])[H])C([H])([H])[H]N([H])c4c([H])c([H])c(c2c([H])c([H])c([H])c3c2C([H])([H])N([H])C3=O)c4c4[H])C(F)(F)[F]</chem>                                                                                                | 10,000 | Inactive |
| CHEMBL1984274 | <chem>O=C3/C(=N/N([H])c2c([H])c([H])c([H])c1c(=O)n([H])n([H])c(=O)c12)C(=NN3c4c([H])c([H])c([H])c([H])c4[H])c5c([H])c([H])c([H])c([H])c5[H]</chem>                                                                                                              | 10,000 | Inactive |
| CHEMBL1975233 | <chem>[Cl]c1c(c([H])c(OC([H])([H])[H])c(c1[H])N([H])C(=O)N([H])c2nc([H])c(nc2[H])C#N)C([H])([H])[H]</chem>                                                                                                                                                      | 10,000 | Inactive |
| CHEMBL1990821 | <chem>O=C(O[H])c1c(c3c(n1[H])c(c2c([H])c([H])c([H])c([H])c2C([H])([H])[H])c([H])c([H])c3[H])C([H])([H])C([H])([H])C([H])([H])Oc4c(c(c([H])c4[H])C([H])([H])[H])C([H])([H])[H])C([H])([H])[H]</chem>                                                             | 10,000 | Inactive |
| CHEMBL377383  | <chem>O=C(c1nc(OC([H])([H])C([H])([H])[H])c([Cl])c(c1[H])N([H])[H]N([H])C([H])([H])c2c([H])c([H])c(c([H])c2[H])[S](=O)(=O)C([H])([H])[H]</chem>                                                                                                                 | 10,000 | Inactive |
| CHEMBL1977604 | <chem>O=C(O[H])c2c1[S]C([H])([H])[C@]([H])(n1c4c(c2=O)c([H])c(F)c(N3C([H])([H])C([H])([H])[C@]([H])(N([H])[H])C3([H])[H])c4[F])C([H])([H])[H]</chem>                                                                                                            | 10,000 | Inactive |
| CHEMBL1419458 | <chem>O=C(c2nnn(c1none1N([H])[H])c2c3c([H])c([H])c([H])c([H])c3[H]N([H])N=C([H])c4c([H])c([H])nc([H])c4[H]</chem>                                                                                                                                               | 10,000 | Inactive |
| CHEMBL256835  | <chem>[F]c4c([H])c([H])c(c1nc([H])n(c1c2nc(OC([H])([H])[H])nc([H])c2[H])[C@]3([H])C([H])([H])C([H])([H])[C@]([H])(O[H])C([H])([H])C3([H])[H])c([H])c4[H]</chem>                                                                                                 | 10,000 | Inactive |
| CHEMBL1984039 | <chem>O=C(O[H])c3c(c2c([H])c([H])c([H])c(c1c(nn(c1C([H])([H])[H])C([H])([H])[H])C([H])([H])[H])c2n3[H])C([H])([H])C([H])([H])C([H])([H])Oc5c([H])c([H])c([H])c4c([H])c([H])c([H])c([H])c45</chem>                                                               | 10,000 | Inactive |
| CHEMBL1979318 | <chem>[H]n1nc(c2c1O/C(=C/C#N)[C@]2([H])c3c([H])c([H])c([H])c([H])c3[I])N([H])[H])C([H])([H])[H]</chem>                                                                                                                                                          | 10,000 | Inactive |



|               |                                                                                                                                                                                       |        |          |
|---------------|---------------------------------------------------------------------------------------------------------------------------------------------------------------------------------------|--------|----------|
| CHEMBL127898  | [F]C([F])([F])Oc4c([H])c([H])c(c1c(n(c(=O)c(C#N)c1[H])C([H])([H])[H]C([H])([H])O[C@]([H])(c2n(c([H])nc2[H])C([H])([H])[H])c3c([H])c([H])c(C#N)c([H])c3[H])c([H])c4[H])                | 10,000 | Inactive |
| CHEMBL1984700 | [F]c4c([H])c([H])c(c2nc1c(OC([H])(C([H])([H])[H])C([H])([H])[H])nc([H])c([H])n1c2c3nc(nc([H])c3[H])N([H])C([H])([H])C(O[H])(C([H])([H])[H])C([H])([H])[H])c([F])c4[H])                | 10,000 | Inactive |
| CHEMBL1969126 | [F]c5c([H])c([H])c(c2nc1oc([H])c([H])n1c2c4c([H])c([H])c3nmm(c3c4[H])C([H])(C([H])([H])[H])C([H])([H])[H])c([F])c5[H])                                                                | 10,000 | Inactive |
| CHEMBL2006493 | O=C3c2c(oc1c([H])c(c([H])c([H])c1c2=O)C([F])([F])[F]C([H])([H])C([H])([H])C3([H])[H])                                                                                                 | 10,000 | Inactive |
| CHEMBL1987793 | O=C(O[H])c2c(c1c(c([H])c([H])c([H])c1[H])C([H])([H])[H])c5c(n2C([H])([H])C([H])([H])C([H])([H])Oc4c([H])c([H])c([H])c3c([H])c([H])c([H])c34c([H])c([H])c([H])c5[H])                   | 10,000 | Inactive |
| CHEMBL1988717 | O=C(N([H])c4c([H])c([H])c(c3c(n2nc([H])c(c1c([H])nc1[H])C([H])([H])[H])c2nc3[H])N([H])[H])c([H])c4[H])N([H])c5c([H])c([H])c([H])c(c5[H])C([F])([F])[F])                               | 10,000 | Inactive |
| CHEMBL223367  | N#Cc1nc([H])c3nc1OC([H])([H])C([H])([H])C([H])([H])C([H])([H])C([H])([H])Oc2c([H])c(c([Cl])c([H])c2N([H])C(=O)N3[H])C([H])([H])C([H])([H])C([H])([H])O[H])                            | 10,000 | Inactive |
| CHEMBL2006631 | O=[S](=O)(N(C([H])([H])[H])C([H])([H])[H])c1c([H])c([H])c([H])c1c2c([H])c([H])c4c(c2[H])N([H])c3c([H])c([H])c([H])c([H])c3N([H])C4=O                                                  | 10,000 | Inactive |
| CHEMBL1982466 | O=C(N([H])c1c([H])c([H])c(c([H])c1[H])C([H])([H])[H])N([H])c5c([H])c([H])c(c4c([H])[s]c3c(c2c([H])nn(c2[H])C([H])([H])[H])c([H])nc(N([H])[H])c34c([H])c5[H])                          | 10,000 | Inactive |
| CHEMBL1988075 | O=C(N([H])c4c([H])c([H])c(c3c2c(nc([H])c(c1c([H])c([H])c(nc1[H])C([H])([H])[H])c2[s]c3[H])N([H])[H])c([H])c4[H])N([H])c5c([H])c([H])c([H])c([F])c5[H])                                | 10,000 | Inactive |
| CHEMBL1970203 | O=C(N([H])c1c([H])c(c([H])c(c1[H])C([H])([H])[H])C([H])([H])[H])N([H])c4c([H])c([H])c(N([H])C(=O)c3c([H])[s]c2nc([H])nc(N([H])[H])c23c([H])c4[H])                                     | 10,000 | Inactive |
| CHEMBL1987910 | O=C(N([H])c3c([H])c([H])c(c2c([H])[s]c1c([H])c([H])nc(N([H])[H])c12c([H])c3[H])N([H])c4c([H])c([H])c([H])c4C([F])([F])[F])                                                            | 10,000 | Inactive |
| CHEMBL1992555 | O=C(N([H])N=C([H])c3oc([S]c2nc1c([H])c([H])c([H])c([H])c1n2[H])c([H])c3[H])c4c([H])c([H])c([H])c([N+](=O)[O-])c4[H])                                                                  | 10,000 | Inactive |
| CHEMBL2001224 | O=C(N([H])c2c(OC1([H])C([H])([H])C([H])([H])C([H])([H])C1([H])[H])c([H])c(c([Cl])c2[H])C([H])([H])[H])N([H])c3nc([H])c(n c3[H])C#N                                                    | 10,000 | Inactive |
| CHEMBL1998551 | [F]c5c([H])c([H])c(c1nc4n(c1c3nn2c(nnc2c([H])c3[H])C(O[H])(C([H])([H])[H])C([H])([H])[H])C([H])([H])C([H])([H])C4([H])[H])c([F])c5[H])                                                | 10,000 | Inactive |
| CHEMBL249282  | N#Cc1nc([H])c(c([H])c1[H])c2nn([H])c4c2C([H])([H])c5c([H])c([H])c(OC([H])([H])C([H])([H])N3C([H])([H])C([H])([H])OC([H])([H])C3([H])[H])c([H])c45                                     | 10,000 | Inactive |
| CHEMBL1975357 | O=C(OC(C([H])([H])[H])C([H])([H])[H])C([H])([H])[H])n3c([H])c(c1c([H])nc([H])n1C2([H])C([H])([H])C([H])([H])C([H])([H])C([H])([H])C2([H])[H])c4c([H])c([H])c([H])c34                  | 10,000 | Inactive |
| CHEMBL2000408 | [F]c4c([H])c([H])c(c2nc1n(c([H])c(nc1C([H])([H])[H])C([H])([H])[H])c2c3nc(nc([H])c3[H])N([H])C([H])([H])C(C([H])([H])[H])C([H])([H])[H])C([H])([H])O[H])c([F])c4[H])                  | 10,000 | Inactive |
| CHEMBL2001257 | O=C(N([H])c3c([H])c([H])c(c2c1c(nc([H])c(C#CC([H])([H])N(C([H])([H])C([H])([H])C([H])([H])C([H])([H])[H])c1[s]c2[H])N([H])[H])c([H])c3[H])N([H])c4c([H])c([H])c(c4[H])C([H])([H])[H]) | 10,000 | Inactive |
| CHEMBL2006715 | O=C(N([H])c6c([H])c([H])c(c2nc1[s]c([H])c([H])n1c2c3nc(nc([H])c3[H])N([H])c5c([H])c([H])c([H])c(N4C(=O)C([H])([H])C([H])([H])C4([H])[H])c5[H])c6[H])c7c([F])c([H])c([H])c([H])c7[F])  | 10,000 | Inactive |
| CHEMBL1972183 | [H]C([H])([H])N1C([H])([H])C([H])([H])C([H])([H])[C@@]1([H])C([H])([H])Oc2c([H])nc([H])c(c2[H])C([H])([H])C([H])([H])c3c([H])c([H])c([H])c3[H])                                       | 10,000 | Inactive |

|               |                                                                                                                                                                                                 |        |          |
|---------------|-------------------------------------------------------------------------------------------------------------------------------------------------------------------------------------------------|--------|----------|
| CHEMBL1974254 | <chem>O=C(N([H])c1c([H])c([H])c(OC([H])([H])C([H])([H])[H])c([H])c1[H])N([H])c5c([H])c([H])c(c4c([H])[s]c3c(c2c([H])nn(c2[H])C([H])([H])[H])c([H])nc(N([H])[H])c34)c([H])c5[H]</chem>           | 10,000 | Inactive |
| CHEMBL378627  | <chem>O=[S](=O)(c1c([H])c(OC([H])([H])[H])c(c([H])c1OC([H])([H])[H])C([H])([H])C(=O)N([H])c2nc(OC([H])(C([H])([H])[H])C([H])([H])[H])c(C#N)c(c2[H])N([H])[H])C([H])([H])[H]</chem>              | 10,000 | Inactive |
| CHEMBL2001547 | <chem>[F]c4c([H])c([H])c(c2nc1c(nc([H])c([H])n1c2c3nc(nc([H])c3[H])N([H])C([H])([H])C(O[H])(C([H])([H])[H])C([H])([H])[H])C([H])([H])C([H])([H])[H])c([F])c4[H]</chem>                          | 10,000 | Inactive |
| CHEMBL1989265 | <chem>O=C(O[H])c2c1[S]C([H])([H])[C@]([H])(n1c4c(c2=O)c([H])c([F])c(N3C([H])([H])C([H])([H])[C@]([H])(N([H])[H])C3([H])[H])c4[H])C([H])([H])[H]</chem>                                          | 10,000 | Inactive |
| CHEMBL2004647 | <chem>[H]n3c2nc(N1C([H])([H])C([H])([H])[C@@]([H])(N([H])C([H])([H])[H])C1([H])[H])c([Br])c(c2c(=O)c(c3[H])C(=O)O[H])C([H])([H])[H]</chem>                                                      | 10,000 | Inactive |
| CHEMBL1991434 | <chem>O=C1ON=C(/C1=C(\[H])c2c([H])c([H])c(OC([H])([H])[H])c(OC([H])([H])[H])c2[H])c3c([H])c([H])c([Br])c([H])c3[H]</chem>                                                                       | 10,000 | Inactive |
| CHEMBL1982980 | <chem>[Cl]c3c([H])c([H])c([H])c(OC([H])([H])C([H])([H])C([H])([H])c2c1c([H])c([H])c([H])c(/C=C(\C([H])([H])[H])C([H])([H])[H])C([H])([H])[H])c1n([H])c2C(=O)O[H])c3[Cl]</chem>                  | 10,000 | Inactive |
| CHEMBL1980142 | <chem>O=C(N([H])c1nc(c([H])c([H])c1[H])C([F])([F])[F])N([H])c3c([H])c([H])nc2c(c([H])c([H])c([H])c23)C([F])([F])[F]</chem>                                                                      | 10,000 | Inactive |
| CHEMBL1977148 | <chem>O=C(N([H])c1c([H])c([H])c(OC([H])([H])[H])c([H])c1[H])N([H])c5c([H])c([H])c(c4c([H])[s]c3c(c2c([H])nn(c2[H])C([H])([H])C([H])([H])O[H])c([H])nc(N([H])[H])c34)c([H])c5[H]</chem>          | 10,000 | Inactive |
| CHEMBL2000429 | <chem>[F]c4c([H])c([H])c(c2nc1c(OC([H])(C([H])([H])[H])C([H])([H])[H])nc([H])c([H])n1c2c3nc(nc([H])c3[H])N([H])C([H])([H])C(C([H])([H])[H])C([H])([H])O[H])c([F])c4[H]</chem>                   | 10,000 | Inactive |
| CHEMBL1987982 | <chem>[F]C([F])([F])Oc4c([H])c([H])c(c3c([H])c([H])c2n([H])c([H])c(/C1=C(\[H])C([H])([H])N([H])C([H])([H])C1([H])[H])c2c3[H])c([H])c4[H]</chem>                                                 | 10,000 | Inactive |
| CHEMBL2006276 | <chem>O=C2c4c(N([H])c1c(OC([H])([H])[H])c([H])c([H])c([H])c1N2[H])c([H])c(N([H])c3c([H])c([H])nc([H])c3[H])c([H])c4[H]</chem>                                                                   | 10,000 | Inactive |
| CHEMBL1995740 | <chem>O=[N+](([O-])c4c([H])c([H])c3N([H])c2c(c([H])c([H])c(c1c([H])c(OC([H])([H])[H])c(O[H])c([H])c1[H])c2[H])C(=O)N([H])c3c4[H]</chem>                                                         | 10,000 | Inactive |
| CHEMBL1979516 | <chem>O=C(N([H])C([H])([H])C([H])([H])[H])c4c([H])nc(N([H])[H])c3c(c2c([H])c([H])c(N([H])C(=O)N([H])c1c([H])c([H])c([H])c([F])c1[H])c([H])c2[H])c([H])[s]c34</chem>                             | 10,000 | Inactive |
| CHEMBL1971141 | <chem>O=C(N([H])c1c([H])c([H])c([H])c(c1[H])C([H])([H])[H])N([H])c3c([H])c([H])c(c2c([H])c([H])c([H])c(C(=O)N([H])[H])c2[H])c([H])c3[H]</chem>                                                  | 10,000 | Inactive |
| CHEMBL1998112 | <chem>O=C(c4c(N([H])c2nc(c1c([H])c([H])c(OC([H])([H])[H])c(OC([H])([H])[H])c1[H])c([H])c3nc([H])c([H])n23)c([H])c([H])c([H])c4[H])N([H])[H]</chem>                                              | 10,000 | Inactive |
| CHEMBL424872  | <chem>O=C(c1nc(OC([H])([H])C([H])([H])[H])c(C#N)c(c1[H])N([H])[H])N([H])C([H])([H])c2c([H])c([H])c(c([H])c2[H])[S](=O)(=O)C([H])([H])[H]</chem>                                                 | 10,000 | Inactive |
| CHEMBL2006010 | <chem>O=C(N([H])c1nc(c([H])c([H])c1[H])C([F])([F])[F])N([H])c3c([H])c([H])nc2c([Cl])c([Cl])c([H])c([H])c23</chem>                                                                               | 10,000 | Inactive |
| CHEMBL1971430 | <chem>O=c3c(c1c([H])c([H])c([H])c(c1[H])C([H])([H])[H])c(nc(N([H])C([H])([H])[C@@]([H])(N([H])[H])C([H])([H])c2c([H])c([H])c([H])c([H])c2[H])n3C([H])([H])[H])c4c([H])c([H])nc([H])c4[H]</chem> | 10,000 | Inactive |
| CHEMBL377408  | <chem>O=C(c1nc(OC([H])([H])C([H])([H])[H])c(C#N)c(c1[H])N([H])[H])N([H])C([H])([H])c2c([H])c([H])c([H])c([H])c2[S](=O)(=O)N([H])[H]</chem>                                                      | 10,000 | Inactive |
| CHEMBL1988995 | <chem>[F]c5c([H])c([H])c(c2nc1oc([H])c([H])n1c2c4nn3c(nnc3c([H])c4[H])C([H])(C([H])([H])[H])C([H])([H])[H])c([F])c5[H]</chem>                                                                   | 10,000 | Inactive |

|               |                                                                                                                                                                                                                                                       |        |          |
|---------------|-------------------------------------------------------------------------------------------------------------------------------------------------------------------------------------------------------------------------------------------------------|--------|----------|
| CHEMBL1982383 | [F]c4c([H])c([H])c(c2nc1c(nc([H])c([H])n1c2c3nc(nc([H])c3[H])N([H])C([H])([H])C(C([H])([H])[H])C([H])([H])[H])C([H])([H])O[H])C([H])([H])C([H])([H])N([H])H)c([H])c4[H]                                                                               | 10,000 | Inactive |
| CHEMBL1973348 | [H]n1c([H])c(c2c1c([H])c([H])c([H])c2[H])C([H])([H])[C@@]([H])(N([H])[H])C([H])([H])Oc5c([H])nc([H])c(c3c([H])c([H])c(N([H])[H])c(c3[H])C(=O)c4c([H])c([H])c([H])c([Cl])c4[H])c5[H]                                                                   | 10,000 | Inactive |
| CHEMBL2004513 | O=C(OC([H])([H])[H])c1c([H])c([H])c([H])c([H])c1c2c([H])c([H])c4c(c2[H])N([H])c3c([H])c([H])c([H])c([H])c3N([H])C4=O                                                                                                                                  | 10,000 | Inactive |
| CHEMBL2002373 | [H]OC([H])([H])C([H])([H])C([H])([H])n2c([H])nc(c1c([H])c([H])c([H])c([H])c1[H])c2c3c([H])c([H])nc([H])c3[H]                                                                                                                                          | 10,000 | Inactive |
| CHEMBL1993941 | O=C(N([H])c4c([H])c([H])c(c3c2c(nc([H])c(c1c([H])n(c1[H])C([H])([H])C([H])([H])C([H])([H])[H])c2[s]c3[H])N([H])[H])c([H])c4[H])N([H])c5c([H])c([H])c([H])c([F])c5[H]                                                                                  | 10,000 | Inactive |
| CHEMBL1969735 | [F]c4c([H])c([H])c(c2nc1c([Cl])nc([H])c([H])n1c2c3nc(nc([H])c3[H])N([H])C([H])([H])C(C([H])([H])[H])C([H])([H])[H])C([H])([H])O[H])c([H])c4[H]                                                                                                        | 10,000 | Inactive |
| CHEMBL2002682 | [Cl]c1c([H])c([H])c([H])c(c1c3c([H])c([H])c([H])c2c(c(C(=O)N([H])C([H])([H])C([H])([H])OC([H])([H])C([H])([H])OC([H])([H])C([H])([H])N([H])H)n([H])c23)C([H])([H])C([H])([H])C([H])([H])Oc5c([H])c([H])c4c([H])c([H])c([H])c([H])c45)C([H])([H])c5[H] | 10,000 | Inactive |
| CHEMBL1982563 | [F]c4c([H])c([H])c(c2nc1c(nc([H])c([H])n1c2c3nc(nc([H])c3[H])N([H])C([H])([H])C(C([H])([H])OC([H])([H])[H])C([H])([H])[H])C([H])([H])[H])C([H])([H])c([H])c4[H]                                                                                       | 10,000 | Inactive |
| CHEMBL1999714 | O=C2N([H])c1c(c([H])c([H])c(c1[H])C([H])([H])[H])N([H])c3c2c([H])c([H])c([H])c3[H]                                                                                                                                                                    | 10,000 | Inactive |
| CHEMBL2001957 | [F]c4c([H])c([H])c(c2nc1c(OC([H])([H])C([F])([F])F)nc([H])c([H])n1c2c3nc(nc([H])c3[H])N([H])C([H])([H])C(C([H])([H])[H])(C([H])([H])[H])C([H])([H])O[H])c([H])c4[H]                                                                                   | 10,000 | Inactive |
| CHEMBL1979855 | O=C(N([H])c1c([H])c(mn1c2c([H])c([H])c([H])c(C(=O)N([H])C([H])([H])C#N)c2[H])C(C([H])([H])[H])C([H])([H])[H])C([H])([H])N([H])c4c([H])c([H])c([H])c3c([H])c([H])c([H])c([H])c34                                                                       | 10,000 | Inactive |
| CHEMBL1995927 | [Cl]c2c([H])c1nc(N([H])C([H])([H])C([H])([H])H)c(nc1c([H])c2OC([H])([H])[H])N([H])C([H])([H])C([H])([H])[H]                                                                                                                                           | 10,000 | Inactive |
| CHEMBL2003482 | O=C(N([H])c1n([H])nc2c1C([H])([H])C([H])([H])C2([H])[H]C([H])([H])c3c([H])c([H])c([Cl])c([H])c3[H]                                                                                                                                                    | 10,000 | Inactive |
| CHEMBL1090360 | O=C(N([H])c6c([H])c([H])c([H])c(c2nc1[s]c([H])c([H])n1c2c3nc(nc([H])c3[H])N([H])c5c([H])c([H])c([H])c(N4C([H])([H])C([H])([H])OC([H])([H])C4([H])H)c5[H])c6[H])C([H])([H])c7c([H])c([H])c([H])c([H])c7[H]                                             | 10,000 | Inactive |
| CHEMBL2001485 | O=C(N([H])c1c([H])c([H])c(c([H])c1[H])C([H])([H])[H]N([H])c5c([H])c([H])c(c4c([H])[s]c3c(c2c([H])mn(c2[H])[C@@]([H])(C(=O)N(C([H])([H])[H])C([H])([H])C([H])([H])H)c([H])nc(N([H])[H])c34)c([H])c5[H]                                                 | 10,000 | Inactive |
| CHEMBL1977374 | [F]c5c([H])c([H])c(c1nc4n(c1c3nn2c(nnc2c([H])c3[H])C([H])([H])[H])C([H])([H])[H])C([H])([H])[H])C([H])([H])C4([H])[H])c([F])c5[H]                                                                                                                     | 10,000 | Inactive |
| CHEMBL1981725 | O=C(c6c([H])c([H])c([H])c(c2nc1c([H])c([H])c([H])c([H])n1c2c3nc(nc([H])c3[H])N([H])c5c([H])c([H])c(N4C([H])([H])C([H])([H])N(C([H])([H])C([H])([H])H)c([H])c5[H])c6[H])N([H])c7c([H])c([H])c([H])c([H])c7[H]                                          | 10,000 | Inactive |
| CHEMBL210963  | O=C(N([H])c1nc(OC([H])([H])C([H])([H])H)c(C#N)c(c1[H])N([H])[H]C([H])([H])c2c([H])c(OC([H])([H])[H])c(c([H])c2OC([H])([H])[H])S(=O)(=O)C([H])([H])H)                                                                                                  | 10,000 | Inactive |
| CHEMBL1614705 | O=C(N4C([H])([H])C([H])([H])C([H])(c2n([H])nc(c1c([H])c([H])c([Cl])c([H])c1[F])c2c3nc([H])nc([H])c3[H])C([H])([H])C4([H])[H])C([H])([H])O[H]                                                                                                          | 10,000 | Inactive |
| CHEMBL2006263 | O=[S](=O)N([H])c2c([H])c([H])c1nc(c(nc1c2[H])C([H])([H])[H])C([H])([H])[H])c3c([H])c([H])c(N([H])[H])c([H])c3[H]                                                                                                                                      | 10,000 | Inactive |
| CHEMBL1966703 | [H]n1nc(c3c1N([H])C2=C(C(=O)C([H])([H])C(C2([H])[H])C([H])([H])[H])C([H])([H])[H])C([H])([H])[H])C([H])([H])[H])C([H])([H])[H])C([H])([H])[H])C([H])([H])[H])C([H])([H])[H])C([H])([H])[H])C([H])([H])[H]                                             | 10,000 | Inactive |

|               |                                                                                                                                                                                                                          |        |          |
|---------------|--------------------------------------------------------------------------------------------------------------------------------------------------------------------------------------------------------------------------|--------|----------|
| CHEMBL1975208 | <chem>O=C(N([H])[C@]3([H])C([H])([H])C([H])([H])N(c2nc1n([H])c([H])c(C(=O)O[H])c(=O)c1c(c2[F])C([H])([H])[H])C3([H])[H])C([H])([H])[H]</chem>                                                                            | 10,000 | Inactive |
| CHEMBL210618  | <chem>O=C(N([H])c1nc(OC([H])([H])C([H])([H])[H])c(C#N)c(c1[H])N([H])[H])C([H])([H])c2c([H])c(OC([H])([H])[H])c([H])c([H])c2OC([H])([H])[H]</chem>                                                                        | 10,000 | Inactive |
| CHEMBL183844  | <chem>O=C(N([H])c1c([H])c([H])c([H])c(c1[H])C([H])([H])[H])N([H])c4c([H])c([H])c(c2c([H])c([H])c([H])c3c2C([H])([H])N([H])C3=O)c([H])c4C([H])([H])[H]</chem>                                                             | 10,000 | Inactive |
| CHEMBL1992242 | <chem>O=C(N([H])c1c([H])c([H])c(c1[H])C([H])([H])[H])C([H])([H])[H])N([H])c4c([H])c([H])c(c3c([H])c([H])c([H])c2[s]nc([H])c23)c([H])c4[H]</chem>                                                                         | 10,000 | Inactive |
| CHEMBL1090356 | <chem>O=C(N([H])c6c([H])c([H])c([H])c(c2nc1[s]c([H])c([H])n1c2c3nc(nc([H])c3[H])N([H])c5c([H])c([H])c(N4C([H])([H])C([H])([H])OC([H])([H])C4([H])[H])c([H])c5[H])c6[H])C([H])([H])c7c([H])c([H])c([H])c([H])c7[H]</chem> | 10,000 | Inactive |
| CHEMBL1991138 | <chem>[H]N([H])c4nc([H])c([H])n3c(nc(c2c([H])c([H])c([H])c(OC([H])([H])c1c([H])c([H])c([H])c([H])c1[H])c2[H])c34)[C@@]6([H])C([H])([H])C@([H])C([H])([H])N5C([H])([H])C([H])([H])C([H])([H])C5([H])[H])C6([H])[H]</chem> | 10,000 | Inactive |
| CHEMBL1990288 | <chem>[F]c5c([H])c([H])c(c2nc1oc([H])c([H])n1c2c3nc(nc([H])c3[H])N([H])[C@]([H])(c4c([H])c([H])c([H])c([H])c4[H])C([H])([H])[H])c([H])c5[H]</chem>                                                                       | 10,000 | Inactive |
| CHEMBL1987359 | <chem>O=C3c2c1c(c([H])c([H])c(N([H])C([H])([H])C([H])([H])C([H])([H])C([H])([H])C([H])([H])c1c([H])c([H])c2[H])C(=O)N3C([H])([H])C([H])([H])N([H])C([H])([H])C([H])([H])O[H]</chem>                                      | 10,000 | Inactive |
| CHEMBL2003768 | <chem>O=c2c(c(N([H])C([H])([H])c1c([H])c([H])c(OC([H])([H])[H])c([H])c1OC([H])([H])[H])c2=O)N([H])c3c([H])c([H])nc([H])c3[H]</chem>                                                                                      | 10,000 | Inactive |
| CHEMBL1988387 | <chem>O=C(N([H])c4c([H])c([H])c(c3c2c(nc([H])c(c1c([H])n(c1[H])C([H])([H])[H])c2[s]c3[H])N([H])[H])c([H])c4[H])N([H])c5c([H])c([H])c(OC([F])([F])[H])c([H])c5[H]</chem>                                                  | 10,000 | Inactive |
| CHEMBL1994040 | <chem>[F]c5c([H])c([H])c(c2nc1c(nc([H])c([H])n1c2c3nc(nc([H])c3[H])N([H])C([H])([H])C(O[H])C([H])([H])[H])C([H])([H])[H])C([H])([H])C4([H])C([H])([H])C4([H])[H])c([F])c5[H]</chem>                                      | 10,000 | Inactive |
| CHEMBL1997503 | <chem>O=C(O[H])[C@@]4([H])C([H])([H])C([H])([H])[C@@]([H])N([H])c3c([H])c([H])c(c1onc(n1)c2c([H])c([H])c(OC([H])C([H])([H])[H])C([H])([H])[H])c([C]1)c2[H])c([H])c3[H])C4([H])[H]</chem>                                 | 10,000 | Inactive |
| CHEMBL1970314 | <chem>O=C(N([H])[H])c3c([H])c(c1c([H])c([H])c([H])c(N([H])[H])c1[H])c([H])c2c([H])c([H])c([H])c([H])nc23</chem>                                                                                                          | 10,000 | Inactive |
| CHEMBL1969537 | <chem>[S]=c1n([H])nc3n1c2nn([H])c(=[S])n2c4[s]c5c(c34)C([H])([H])C([H])([H])C5([H])[H]</chem>                                                                                                                            | 10,000 | Inactive |
| CHEMBL2007044 | <chem>[H]n2nc(c1c([H])c([H])c(C#N)nc1[H])c4c2c3c(c([H])c([H])c(C#CC([H])([H])N(C([H])([H])C([H])([H])[H])C([H])([H])C([H])([H])C([H])([H])C4([H])[H]</chem>                                                              | 10,000 | Inactive |
| CHEMBL223460  | <chem>O=[S](=O)N([H])c2c([H])c1OC([H])([H])C([H])([H])C([H])([H])C([H])([H])C([H])([H])C([H])([H])Oc3nc(N([H])C(=O)N([H])c1c([H])c2[C]1)c([H])nc3C#N)C([H])([H])[H]</chem>                                               | 10,000 | Inactive |
| CHEMBL1995832 | <chem>[F]c4c([H])c([H])c(c2nc1c(OC([H])([H])[H])nc([H])c([H])n1c2c3nc(nc([H])c3[H])N([H])C([H])([H])C(C([H])([H])[H])C([H])([H])C([H])([H])C([H])([H])O[H])c([F])c4[H]</chem>                                            | 10,000 | Inactive |
| CHEMBL1375418 | <chem>[H]C([H])([H])c1c([H])c([H])c(c([H])c1[H])C([H])([H])N([H])c4nn2c(nnc2c3c([H])c([H])c([H])c([H])c3[H])c([H])c4[H]</chem>                                                                                           | 10,000 | Inactive |
| CHEMBL259922  | <chem>O=C(c1c([H])c([H])c(c1[H])N([H])c2nc([H])nc3c2c([H])nn3c4c([H])c([H])c([H])c([H])c4[H])C([H])([H])[H])N([H])c5noc([H])c5[H]</chem>                                                                                 | 10,000 | Inactive |
| CHEMBL1983449 | <chem>O=c2c(c(N([H])C([H])([H])c1c([H])c([H])c(c(c1[H])C([H])([H])[H])C([H])([H])[H])c2=O)N([H])c3c([H])c([H])nc([H])c3[H]</chem>                                                                                        | 10,000 | Inactive |
| CHEMBL1994321 | <chem>O=C(N([H])c1c([H])c([H])c([H])c(c1[H])C([H])([H])[H])N([H])c4c([H])c([H])c(c3c([H])[s]c2c(C#CC([H])([H])N([H])[S](=O)(=O)C([H])([H])[H])c([H])nc(N([H])[H])c23)c([H])c4[H]</chem>                                  | 10,000 | Inactive |

|               |                                                                                                                                                                                                                 |        |          |
|---------------|-----------------------------------------------------------------------------------------------------------------------------------------------------------------------------------------------------------------|--------|----------|
| CHEMBL2000508 | [F]c4c([H])c([H])c(c2nc1[s]c([H])c([H])n1c2c3c([H])c([H])nc([H])c3[H])c([H])c4[H]                                                                                                                               | 10,000 | Inactive |
| CHEMBL2004419 | [F]c2c1nc(n(c1c([H])c(c2[H])c4c(nc3[s]c([H])c([H])n34)c5c([H])c([H])c([F])c([H])c5[H])C([H])([H])C([H])C([H])([H])C([H])([H])N([H])H]                                                                           | 10,000 | Inactive |
| CHEMBL2007372 | [F]c4c([H])c([H])c(c2nc1c(nc([H])c([H])n1c2c3nc(nc([H])c3[H])N([H])C([H])([H])C(C([H])([H])C([H])([H])C([H])([H])C([H])([H])O([H])N([H])C([H])([H])H)c([H])c4[H]                                                | 10,000 | Inactive |
| CHEMBL1230122 | O=c2n(c1nc(nc([H])c1c([H])c2Oc3c([H])c([H])c([F])c([H])c3[F])N([H])C4([H])C([H])([H])C([H])([H])OC([H])([H])C4([H])H)C([H])([H])H]                                                                              | 10,000 | Inactive |
| CHEMBL1996234 | [H]C([H])([H])[C@]6(O[H])C([H])([H])[C@]([H])(c5nc(c2c([H])c([H])c1c([H])c([H])c(nc1c2[H])c3c([H])c([H])c([H])c([H])c3[H])c4c(nc([H])c([H])n45)N([H])H)C6([H])H]                                                | 10,000 | Inactive |
| CHEMBL1968127 | [F]c4c([H])c([H])c(c2nc1oc([H])c([H])n1c2c3nc(nc([H])c3[H])N([H])C([H])([H])C(C([H])([H])N(C([H])([H])H)C([H])([H])H)C([H])([H])H)C([H])([H])H)c([H])c4[H]                                                      | 10,000 | Inactive |
| CHEMBL1970735 | O=C(N([H])c1nc(OC([H])([H])C([H])([H])C([H])([H])H)c(C#N)c(c1[H])N([H])H)C([H])([H])H]                                                                                                                          | 10,000 | Inactive |
| CHEMBL246970  | [Cl]c1c(c([H])c([H])c([H])c1[H])C([H])([H])N([H])c3nc(N([H])C([H])([H])[C@@]2([H])C([H])([H])C([H])([H])[C@@]([H])C([H])([H])N([H])H)C([H])([H])C2([H])H)c(c([H])n3)[N+](=O)[O-]                                | 10,000 | Inactive |
| CHEMBL1968791 | [H]C([H])([H])c4c(c2c([H])c([H])c([H])c(OC([H])([H])c1c([H])c([H])c([H])c([H])c1[H])c2[H])c3c(nc([H])nc3n4[C@]6([H])C([H])([H])C@]([H])C([H])([H])N5C([H])([H])C([H])([H])C([H])([H])C5([H])H)C6([H])H)N([H])H] | 10,000 | Inactive |
| CHEMBL1967116 | O=C(N([H])c1c([H])c([H])c(c1[H])C([H])([H])N([H])c5c([H])c([H])c(c4c([H])s]c3c(c2c([H])nn(c2[H])C([H])([H])H)c([H])nc(N([H])H)c34)c([H])c5[H]                                                                   | 10,000 | Inactive |
| CHEMBL2004716 | O=C(N([H])C([H])([H])C([H])([H])N(C([H])([H])C([H])([H])H)C([H])([H])C([H])([H])C([H])=C([H])c4c([H])nc(N([H])H)c3c(c2c([H])c([H])c(N([H])C(=O)N([H])c1c([H])c([H])c(c1[H])C([H])([H])H)c([H])c2[H])c([H])s]c34 | 10,000 | Inactive |
| CHEMBL1999496 | O=C(N([H])c1c([H])c([H])nc([H])c1[H])[C@@]4([H])C(c2c([H])c([H])c([H])c2[H])C([H])([H])H)(c3c([H])c([H])c([H])c3[H])C([H])([H])H)C4([H])H]                                                                      | 10,000 | Inactive |
| CHEMBL2004871 | [F]c3c([H])c([H])c(c1nc([H])n(c1c2c([H])c([H])nc([H])c2[H])C([H])([H])C([H])([H])C([H])([H])O([H])c([H])c3[H]                                                                                                   | 10,000 | Inactive |
| CHEMBL1985153 | O=C(O[H])c3c(N([H])c1nc(nc([H])c1[H])N([H])[C@@]2([H])[C@@]([H])N([H])H)C([H])([H])C([H])([H])C([H])([H])C2([H])H)c([H])c([H])c([H])c3[H]                                                                       | 10,000 | Inactive |
| CHEMBL1999321 | O=c4c(N([H])C([H])([H])C([H])([H])c2c([H])c([H])c(Oc1c([H])c([H])c([H])c([H])c1[H])c([H])c2[H])c(N([H])c3c([H])c([H])nc([H])c3[H])c4=O                                                                          | 10,000 | Inactive |
| CHEMBL2005375 | O=C2N(c1c([H])nc(nc1N([C@@]2([H])C([H])([H])C([H])([H])H)[C@]3([H])C([H])([H])C([H])([H])C3([H])H)N([H])c5c([H])c([H])c(C(=O)N([H])[C@@]4([H])C([H])([H])C([H])([H])C([H])([H])C4([H])H)c([H])c5OC([H])([H])H   | 10,000 | Inactive |
| CHEMBL1998193 | O=C(N([H])C([H])([H])C([H])([H])C([H])([H])C([H])([H])C([H])([H])N([H])C(=O)N([H])c1c([H])c([H])c([H])nc1[H])N([H])c2c([H])c([H])c([H])nc2[H]                                                                   | 10,000 | Inactive |
| CHEMBL1982866 | [Cl]c3c([H])c([H])c(c1nn(c([H])c1c2nc([H])nc([H])c2[H])C([H])([H])C([H])([H])OC([H])([H])H)c([H])c3[H]                                                                                                          | 10,000 | Inactive |
| CHEMBL1972659 | O=C(N([H])N=C2c1c([H])c([H])c(O[H])c(c1C([H])([H])C([H])([H])C2([H])H)C([H])([H])H)C([H])([H])c4c([H])c([H])c([H])c3c([H])c([H])c([H])c([H])c3[H]                                                               | 10,000 | Inactive |
| CHEMBL248757  | N#Cc1nc([H])c4nc1OC([H])([H])C([H])([H])C([H])([H])C([H])([H])Oc3c([H])c(N([H])C([H])([H])c2[s]c([H])nc2[H])c([Cl])c([H])c3N([H])C(=O)N4[H]                                                                     | 10,000 | Inactive |
| CHEMBL363648  | O=C(N([H])c3nc([H])c([H])c(c1[s]c(nc1c2c([H])c([H])c([H])c(c2[H])C([H])([H])H)C([H])([H])C([H])([H])H)c3[H])c4c([H])c([H])c([H])c([H])c4[H]                                                                     | 10,000 | Inactive |

|               |                                                                                                                                                                                                                   |           |          |
|---------------|-------------------------------------------------------------------------------------------------------------------------------------------------------------------------------------------------------------------|-----------|----------|
| CHEMBL1971149 | <chem>O=C(O[H])C(C([H])([H])N([H])c1nc([H])c([H])c(n1)c3n2c([H])c([H])nc(c2nc3c4c([H])c([H])c([F])c([H])c4[F])C([H])([H])[H])(C([H])([H])[H])C([H])([H])[H])</chem>                                               | 10,000    | Inactive |
| CHEMBL1991143 | <chem>O=c3c2c(nm(c1c([H])c([H])c(c([H])c1[H])C([H])([H])[H])c2n(O[H])c4c3c([H])c([Cl])c([H])c4[H])C([H])([H])[H])</chem>                                                                                          | 10,000    | Inactive |
| CHEMBL1999590 | <chem>[H]C([H])([H])c1nn(c(c1[H])c2c([H])c([H])c([H])c([H])c2[H])c3nc([H])nc(c3[H])N([H])N=C([H])c4oc([H])c([H])c4[H]</chem>                                                                                      | 10,000    | Inactive |
| CHEMBL1971186 | <chem>[F]c5c([H])c([H])c(c2nc1oc([H])c([H])n1c2c3nc(nc([H])c3[H])N([H])C4([H])C([H])([H])C([H])([H])N([H])C([H])([H])C4([H])[H])c([H])c5[H]</chem>                                                                | 10,000    | Inactive |
| CHEMBL1991429 | <chem>O=C(N([H])c6c([H])c([H])c([H])c(c2nc1[s]c([H])c([H])n1c2c3nc(nc([H])c3[H])N([H])c5c([H])c([H])c([H])c(N4C(=O)C([H])([H])C([H])([H])C4([H])[H])c5[H])c6[H])C([H])([H])c7c([H])c([H])c([H])c([H])c7[H]</chem> | 10,000    | Inactive |
| CHEMBL1995916 | <chem>O=C(N([H])C([H])([H])[H])c1nn([H])c(c1[H])c2c([H])c([H])c([H])c([H])c2[H]</chem>                                                                                                                            | 12,589.20 | Inactive |
| CHEMBL1969156 | <chem>[H]N([H])c3nc([H])c([H])c2c([H])nc(c1c([H])c([H])c([H])c([H])c1[H])n23</chem>                                                                                                                               | 12,589.20 | Inactive |
| CHEMBL2003545 | <chem>O=C(OC([H])([H])[H])c2c([H])[s]c1c([H])c([H])c(=O)n([H])c12</chem>                                                                                                                                          | 12,589.20 | Inactive |
| CHEMBL1965683 | <chem>[H]n1nc([H])c2c1C([H])([H])C([H])([H])[C@@]2([H])c3c([H])c([H])c([H])c3[H]</chem>                                                                                                                           | 12,589.20 | Inactive |
| CHEMBL2002480 | <chem>[H]N([H])c3nc2nc([H])c(c1c([H])c([H])c([H])c([H])c1[H])c([H])n2n3</chem>                                                                                                                                    | 15,848.90 | Inactive |
| CHEMBL1997119 | <chem>[H]N([H])c3nc([H])c2c([H])c([H])c([H])c(c1c([H])c([H])c([H])c([H])c1[H])n23</chem>                                                                                                                          | 15,848.90 | Inactive |
| CHEMBL1178727 | <chem>[H]N([H])c1nc2c([s]1)C([H])([H])c3c([H])c([H])c([H])c23</chem>                                                                                                                                              | 15,848.90 | Inactive |
| CHEMBL1989423 | <chem>[H]n3nc2c1c([H])c([H])c([H])c([H])c1C([H])([H])c2c3[H]</chem>                                                                                                                                               | 19,952.60 | Inactive |
| CHEMBL1968460 | <chem>[H]C([H])([H])n1c(nc2[s]c([H])c([H])c12)N([H])[H]</chem>                                                                                                                                                    | 19,952.60 | Inactive |
| CHEMBL1992673 | <chem>O=c3n([H])c1c([H])c([H])c([Cl])c([H])c1c2nc([H])nn23</chem>                                                                                                                                                 | 19,952.60 | Inactive |
| CHEMBL1971785 | <chem>[H]n1c(c(c(=O)oc1=O)c2c([H])c([H])c([H])c([H])c2[H])C([H])([H])[H]</chem>                                                                                                                                   | 19,952.60 | Inactive |
| CHEMBL2000879 | <chem>[H]n1nc([H])c3c1C([H])([H])C([H])([H])[C@]([H])(c2c([H])c([H])c([H])c([H])c2[H])C3([H])[H]</chem>                                                                                                           | 25,118.90 | Inactive |
| CHEMBL1992607 | <chem>O=C2c1c(nc([H])nc1N([H])C([H])([H])C([H])([H])N2[H])N([H])[H]</chem>                                                                                                                                        | 25,118.90 | Inactive |
| CHEMBL2002802 | <chem>O=C(c2[s]c1nc(n(c1c2[H])C([H])([H])[H])N([H])[H])N([H])[H]</chem>                                                                                                                                           | 25,118.90 | Inactive |
| CHEMBL1727312 | <chem>O=C2N([H])c1c([H])c([H])c([H])c([H])c1N([H])c3c([H])c([H])c([H])c([H])c23</chem>                                                                                                                            | 25,118.90 | Inactive |
| CHEMBL2001704 | <chem>[H]N([H])c3nnc2[s]c1c([H])c([H])c([H])c([H])c1n23</chem>                                                                                                                                                    | 31,622.80 | Inactive |

|               |                                                                                                  |           |          |
|---------------|--------------------------------------------------------------------------------------------------|-----------|----------|
| CHEMBL1965838 | [H]C([H])([H])c2c([H])[s]c1nc(nn12)N([H])[H]                                                     | 31,622.80 | Inactive |
| CHEMBL2003952 | [H]n1nc(c(c(c1=O)N([H])[H])C(O[H])(C([H])([H])[H])C([H])([H])[H])c2c([H])c([H])c([H])c([H])c2[H] | 31,622.80 | Inactive |
| CHEMBL2001378 | [H]N([H])c2nnc(c1c([H])c([H])c([H])c([H])c1[H])c(n2)N([H])[H]                                    | 39,810.70 | Inactive |
| CHEMBL1975911 | O=c3n([H])c([H])c([H])c2c([H])nc(c1c([H])c([H])c([H])c([H])c1[H])n23                             | 39,810.70 | Inactive |
| CHEMBL1971679 | O=C(O[H])c2c([H])nc1[s]c([H])c([H])n1c2=O                                                        | 39,810.70 | Inactive |
| CHEMBL1980853 | N#Cc1c([H])nc([Cl])nc1N([H])[H]                                                                  | 50,118.70 | Inactive |
| CHEMBL1970873 | O=C2c1c(c([H])c([H])c(c1[H])C([H])([H])[H])N([H])c3c(N2[H])c([H])c([H])c([H])c3[H]               | 50,118.70 | Inactive |
| CHEMBL1998228 | [Cl]c3nc([H])n1c(nnc1c2c([H])c([H])c([H])c([H])c2[H])c3[H]                                       | 63,095.70 | Inactive |
| CHEMBL1967612 | O=C1N([H])[S](=O)(=O)c2c([H])c([H])c([Cl])c([H])c12                                              | 63,095.70 | Inactive |
| CHEMBL1991251 | [H]N([H])c1nonc1n2nnc(c2[H])C([H])([H])O[H]                                                      | 63,095.70 | Inactive |
| CHEMBL1966799 | [Cl]c2c([H])c([H])c([H])c1nnc(N([H])[H])n12                                                      | 63,095.70 | Inactive |
| CHEMBL1991008 | [H]n1nc(N([H])[H])c3c1c(c2c([H])c([H])c([H])c([H])c2[H])c([H])c([H])c3[H]                        | 79,432.80 | Inactive |
| CHEMBL1994808 | N#Cc1nc(nnc1c2c([H])c([H])c([H])c([H])c2[H])C([H])([H])[H]                                       | 79,432.80 | Inactive |
| CHEMBL2004887 | [H]N([H])c3nc([H])c([H])c2nc(c1c([H])c([H])c([H])c([H])c1[H])c([H])n23                           | 79,432.80 | Inactive |
| CHEMBL1980003 | [H]C([H])([H])c1c([H])c([H])c([H])c([H])c1c3c([H])c([H])c([H])c2nc([H])c([H])n23                 | 79,432.80 | Inactive |

**Table S6:** Ordered NCI compounds, their fit values against the GFA-SVR ML-QSAR selected pharmacophores, their ML activity prediction and the percentage of inhibition at 10  $\mu$ M

| Hit       | NCI Code | Structure                                                                           | CHI_2 | Num Rings | LRCFs                               |                                     |                                     | Fit values against |                |                | Prediction IC <sub>50</sub> (nM) | % Inhibition at 10 $\mu$ M (IC <sub>50</sub> nM) |
|-----------|----------|-------------------------------------------------------------------------------------|-------|-----------|-------------------------------------|-------------------------------------|-------------------------------------|--------------------|----------------|----------------|----------------------------------|--------------------------------------------------|
|           |          |                                                                                     |       |           | LEU <sub>244</sub> HN <sup>LD</sup> | ASP <sub>325</sub> HA <sup>LD</sup> | VAL <sub>324</sub> HB <sup>LD</sup> | Hypo (5-R2-08)     | Hypo (6-R2-07) | Hypo (8-R3-08) |                                  |                                                  |
| <b>92</b> | 9334     | 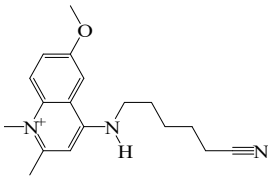   | 8.8   | 2         | 0                                   | 0                                   | 0                                   | 7.3                | 0.0            | 6.9            | 191.0                            | 18                                               |
| <b>93</b> | 9336     |    | 10.8  | 3         | 1                                   | 0                                   | 0                                   | 6.1                | 3.5            | 4.7            | 178.0                            | 65                                               |
| <b>94</b> | 13633    |    | 12.5  | 3         | 0                                   | 0                                   | 0                                   | 7.7                | 6.6            | 0.0            | 145.0                            | 1                                                |
| <b>95</b> | 55230    |   | 16.0  | 4         | 0                                   | 0                                   | 0                                   | 6.5                | 2.4            | 6.9            | 276.0                            | 2                                                |
| <b>96</b> | 57129    |  | 13.8  | 3         | 0                                   | 0                                   | 0                                   | 5.7                | 4.9            | 3.7            | 171.0                            | 99<br>(57.5)                                     |
| <b>97</b> | 127626   |  | 16.9  | 4         | 0                                   | 0                                   | 0                                   | 5.9                | 2.7            | 7.4            | 271.0                            | 64                                               |
| <b>98</b> | 127681   |  | 11.8  | 3         | 0                                   | 0                                   | 0                                   | 5.7                | 3.3            | 7.3            | 216.0                            | 24                                               |
| <b>99</b> | 134169   |  | 14.0  | 2         | 0                                   | 0                                   | 0                                   | 5.6                | 2.9            | 7.24           | 250.0                            | 43                                               |



**Table S6:** Ordered NCI compounds, their fit values against the GFA-SVR ML-QSAR selected pharmacophores, their ML activity prediction and the percentage of inhibition at 10  $\mu$ M

| Hit | NCI Code | Structure                                                                           | CHI_2 | Num Rings | LRCFs                               |                                     |                                     | Fit values against |                |                | Prediction IC <sub>50</sub> (nM) | % Inhibition at 10 $\mu$ M (IC <sub>50</sub> nM) |
|-----|----------|-------------------------------------------------------------------------------------|-------|-----------|-------------------------------------|-------------------------------------|-------------------------------------|--------------------|----------------|----------------|----------------------------------|--------------------------------------------------|
|     |          |                                                                                     |       |           | LEU <sub>244</sub> HN <sup>LD</sup> | ASP <sub>325</sub> HA <sup>LD</sup> | VAL <sub>324</sub> HB <sup>LD</sup> | Hypo (5-R2-08)     | Hypo (6-R2-07) | Hypo (8-R3-08) |                                  |                                                  |
| 100 | 164472   | 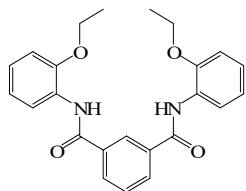   | 12.3  | 3         | 0                                   | 0                                   | 0                                   | 5.69               | 1.82           | 7.24           | 240.0                            | 3                                                |
| 101 | 166726   |    | 12.8  | 2         | 1                                   | 0                                   | 1                                   | 7.74               | 3.14           | 3.35           | 188.0                            | 11                                               |
| 102 | 324572   |    | 16.9  | 3         | 0                                   | 0                                   | 0                                   | 6.45               | 2.78           | 7.61           | 269.0                            | 23                                               |
| 103 | 342048   |   | 13    | 3         | 0                                   | 0                                   | 1                                   | 5.23               | 1.95           | 7.25           | 320.0                            | 3                                                |
| 104 | 367067   |  | 13.3  | 3         | 0                                   | 0                                   | 0                                   | 7.40               | 1.82           | 4.96           | 195.0                            | 52                                               |
| 105 | 371713   |  | 10.8  | 3         | 0                                   | 0                                   | 0                                   | 7.05               | 5.68           | 1.52           | 95.0                             | 2                                                |
| 106 | 409969   |  | 11.9  | 2         | 1                                   | 0                                   | 0                                   | 5.71               | 5.60           | 4.72           | 60.0                             | 4                                                |
| 107 | 645812   |  | 11.4  | 3         | 0                                   | 0                                   | 0                                   | 5.90               | 2.36           | 6.23           | 252.0                            | 76 (1717)                                        |

**Table S6:** Ordered NCI compounds, their fit values against the GFA-SVR ML-QSAR selected pharmacophores, their ML activity prediction and the percentage of inhibition at 10  $\mu$ M.

| Hit | NCI Code | Structure                                                                           | CHI <sub>2</sub> | Num Rings | LRCFs                               |                                     |                                     | Fit values against |                |                | Prediction IC <sub>50</sub> (nM) | % Inhibition at 10 $\mu$ M (IC <sub>50</sub> nM) |
|-----|----------|-------------------------------------------------------------------------------------|------------------|-----------|-------------------------------------|-------------------------------------|-------------------------------------|--------------------|----------------|----------------|----------------------------------|--------------------------------------------------|
|     |          |                                                                                     |                  |           | LEU <sub>244</sub> HN <sup>LD</sup> | ASP <sub>325</sub> HA <sup>LD</sup> | VAL <sub>324</sub> HB <sup>LD</sup> | Hypo (5-R2-08)     | Hypo (6-R2-07) | Hypo (8-R3-08) |                                  |                                                  |
| 108 | 653145   | 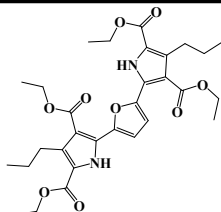   | 16.6             | 0         | 1                                   | 0                                   | 0                                   | 3.14               | 5.10           | 7.23           | 264.0                            | 0                                                |
| 109 | 660824   |    | 15.1             | 4         | 1                                   | 1                                   | 0                                   | 6.70               | 3.89           | 7.72           | 221.0                            | 94 (272.9)                                       |
| 110 | 669887   |    | 14.6             | 4         | 0                                   | 0                                   | 0                                   | 5.29               | 3.58           | 5.15           | 232.0                            | 3                                                |
| 111 | 670676   |   | 11.4             | 3         | 0                                   | 0                                   | 0                                   | 6.48               | 5.37           | 3.21           | 88.0                             | 2                                                |
| 112 | 671988   |  | 16.8             | 2         | 0                                   | 0                                   | 0                                   | 6.58               | 3.16           | 7.60           | 269.0                            | 2                                                |
| 113 | 672085   |  | 16.5             | 2         | 1                                   | 0                                   | 0                                   | 4.15               | 3.75           | 7.57           | 261.0                            | 1                                                |
| 114 | 675782   |  | 10.3             | 3         | 0                                   | 0                                   | 0                                   | 6.57               | 6.87           | 3.25           | 65.0                             | 33                                               |
| 115 | 734059   |  | 17.5             | 4         | 0                                   | 0                                   | 0                                   | 6.49               | 4.34           | 7.87           | 264.0                            | 20                                               |
